# Supplementary material
Source: publisher site journal article supplement (https://www.spandidos-publications.com/7084/downloadSupplementary)
Supplement: Supplementary file 1 [file downloadSupplementary]

## Sheet: P21120201.clusterMacrophages1_d
Table SI. Differential gene expression levels of macrophage clusters.
gene_id	p_val	avg_logFC	pct.1	pct.2	p_val_adj
CCL3L1	1.15e-47	2.35406	0.906	0.443	2.98e-43
CXCL8	6.21e-37	2.17579	0.856	0.443	1.61e-32
CCL4L2	1.95e-32	2.15707	0.842	0.485	5.07e-28
CCL4	4.28e-37	2.10013	0.914	0.612	1.11e-32
IL1B	1.48e-27	1.8711	0.741	0.39	3.86e-23
CCL3	5.56e-44	1.85989	0.964	0.661	1.44e-39
DNAJB1	2.02e-43	1.80896	0.971	0.762	5.25e-39
HSPH1	6.01e-24	1.76647	0.849	0.674	1.56e-19
HSPA1B	1.4e-44	1.74081	0.964	0.696	3.64e-40
HSPA1A	8.03e-46	1.68166	0.978	0.916	2.09e-41
TNF	2.78e-25	1.6025	0.662	0.258	7.22e-21
EGR1	5.06e-40	1.47565	0.942	0.709	1.32e-35
RGS1	1.1e-41	1.43005	0.993	0.833	2.86e-37
HSP90AA1	1.59e-36	1.42073	1	0.989	4.14e-32
IER2	1.29e-37	1.38282	0.942	0.749	3.36e-33
CD83	2.89e-30	1.37384	0.835	0.52	7.5e-26
IER5	1.39e-34	1.35521	0.871	0.557	3.62e-30
PPP1R15A	1.54e-33	1.34769	0.914	0.648	3.99e-29
IER3	2.13e-28	1.33697	0.914	0.685	5.53e-24
EGR2	6.76e-24	1.2865	0.719	0.383	1.76e-19
RGS2	6.33e-22	1.27913	0.871	0.707	1.65e-17
JUN	3.99e-48	1.27803	1	0.985	1.04e-43
P2RY13	3.65e-27	1.25176	0.871	0.559	9.49e-23
KLF6	9.82e-39	1.23892	1	0.921	2.55e-34
BAG3	1.01e-11	1.23733	0.446	0.22	2.63e-07
CLDN1	3.4e-29	1.2058	0.763	0.319	8.83e-25
NFKBIZ	3.92e-24	1.1874	0.698	0.35	1.02e-19
TNFAIP3	4.3e-20	1.16697	0.813	0.557	1.12e-15
TRA2B	3.61e-28	1.1634	0.871	0.665	9.39e-24
ATF3	9.38e-27	1.14481	0.842	0.493	2.44e-22
SGK1	3.23e-35	1.13193	0.986	0.877	8.4e-31
ZFAND2A	3.31e-08	1.10313	0.432	0.256	0.000859688
PTGS2	1.33e-23	1.10093	0.46	0.108	3.45e-19
FOSB	4.31e-20	1.07959	0.777	0.546	1.12e-15
NR4A2	8.42e-21	1.0751	0.547	0.198	2.19e-16
NFKBIA	2.55e-22	1.02536	0.986	0.965	6.64e-18
FOS	1.41e-35	1.02282	1	0.976	3.65e-31
HSP90AB1	1.52e-29	1.00612	0.993	0.991	3.96e-25
CXCL2	1.47e-05	0.991978	0.468	0.337	0.381042
HSPB1	7.41e-08	0.959209	0.863	0.888	0.00192583
HSPA6	0.000374427	0.953742	0.367	0.264	1
SRSF7	2.2e-18	0.932921	0.914	0.833	5.72e-14
HSPD1	4.68e-13	0.922868	0.856	0.824	1.22e-08
TWISTNB	0.00464951	0.911424	0.417	0.374	1
NR4A1	2.75e-17	0.90605	0.64	0.363	7.14e-13
GPR183	6.88e-09	0.897475	0.77	0.736	0.000178801
HCAR3	1.15e-06	0.894475	0.259	0.108	0.029829
DUSP1	6.57e-29	0.890299	0.986	0.954	1.71e-24
C3	1.99e-30	0.883274	0.914	0.513	5.16e-26
KLF4	1.05e-15	0.868225	0.784	0.601	2.72e-11
KLF2	1.57e-18	0.866435	0.59	0.269	4.07e-14
PLK2	3.87e-16	0.844993	0.482	0.181	1.01e-11
OTUD1	1.97e-12	0.838571	0.525	0.284	5.12e-08
NAPSB	8.86e-26	0.836454	0.842	0.485	2.3e-21
GADD45B	1.55e-15	0.823356	0.906	0.804	4.04e-11
UBC	9.03e-26	0.813153	1	0.987	2.35e-21
CCNL1	5.46e-19	0.800139	0.885	0.74	1.42e-14
HLA-DRB6	7.74e-13	0.799268	0.54	0.253	2.01e-08
TRIB1	1.23e-17	0.784066	0.683	0.423	3.19e-13
RHOB	4.59e-21	0.772787	0.849	0.604	1.19e-16
CLK1	3.51e-21	0.77253	0.799	0.544	9.13e-17
ZFP36	2.2e-17	0.769381	0.978	0.921	5.71e-13
CLEC5A	1.48e-19	0.754434	0.763	0.467	3.84e-15
PTGER4	3.3e-09	0.752159	0.583	0.445	8.57e-05
PHACTR1	5.43e-13	0.7402	0.626	0.403	1.41e-08
HSPE1	7.23e-15	0.735872	0.878	0.822	1.88e-10
BCL2A1	2.64e-10	0.734641	0.784	0.573	6.86e-06
HERPUD1	4.35e-19	0.728179	0.921	0.826	1.13e-14
OGFRL1	1.66e-25	0.716677	0.906	0.705	4.33e-21
FCGBP	1.52e-12	0.690595	0.46	0.198	3.96e-08
USP53	5.25e-19	0.689271	0.583	0.238	1.36e-14
HSPA8	3.9e-20	0.682839	0.971	0.963	1.01e-15
CD69	9.32e-07	0.677662	0.525	0.385	0.0242294
PHLDA1	4.65e-07	0.676021	0.482	0.333	0.0120979
HCAR2	8.19e-12	0.671371	0.353	0.117	2.13e-07
DNAJA1	2.56e-09	0.653787	0.885	0.817	6.65e-05
RGS16	0.000178334	0.653178	0.288	0.174	1
PNRC1	2.42e-21	0.651876	0.978	0.881	6.28e-17
KLF10	1.45e-09	0.645718	0.576	0.374	3.77e-05
CDKN1A	4.71e-13	0.644136	0.763	0.581	1.22e-08
DUSP2	1.41e-05	0.642026	0.403	0.26	0.366264
FCER1A	4.23e-10	0.641346	0.309	0.106	1.1e-05
CX3CR1	3.27e-20	0.634412	0.698	0.291	8.5e-16
CXCR4	1.08e-10	0.631983	0.813	0.678	2.81e-06
G0S2	0.147441	0.625237	0.201	0.163	1
JUNB	4.06e-13	0.624943	0.95	0.914	1.06e-08
DNAJB4	3.55e-09	0.619052	0.504	0.3	9.23e-05
BTG2	2e-12	0.618218	0.77	0.57	5.19e-08
TAGAP	3.03e-10	0.605854	0.576	0.366	7.88e-06
ATP2B1-AS1	3.5e-11	0.595877	0.504	0.256	9.09e-07
PLEK	6.65e-05	0.594978	0.791	0.833	1
PMAIP1	1.78e-12	0.594826	0.475	0.211	4.64e-08
IFRD1	3.08e-11	0.59206	0.468	0.242	8.01e-07
SRSF3	9.05e-16	0.591649	0.885	0.771	2.35e-11
ID2	1.41e-07	0.586198	0.892	0.87	0.00367023
NR4A3	3.76e-16	0.576802	0.381	0.106	9.78e-12
STK17B	8.91e-18	0.569379	0.755	0.458	2.32e-13
PDK4	2.56e-06	0.56899	0.676	0.573	0.0666175
PLIN2	2.08e-06	0.565456	0.863	0.826	0.0541776
YWHAH	8.08e-20	0.558346	0.964	0.797	2.1e-15
FILIP1L	4.35e-10	0.551487	0.604	0.368	1.13e-05
WSB1	1.42e-13	0.551234	0.906	0.8	3.7e-09
BHLHE41	2.39e-12	0.550115	0.698	0.476	6.22e-08
DDX5	3.26e-26	0.546498	1	0.996	8.48e-22
DNAJA4	2.84e-09	0.541306	0.324	0.132	7.39e-05
MEF2A	5.35e-14	0.536365	0.813	0.727	1.39e-09
B3GNT5	1.39e-06	0.533688	0.683	0.588	0.0360025
HLA-DQA2	2.37e-12	0.529956	0.489	0.214	6.15e-08
AC023157.3	1.62e-08	0.507828	0.288	0.106	0.000420537
UBB	3.11e-09	0.505484	0.986	0.996	8.07e-05
JMJD1C	9.51e-08	0.505202	0.734	0.687	0.00247195
SAP30	9.52e-11	0.503469	0.525	0.293	2.47e-06
PLD4	9.26e-16	0.500038	0.719	0.348	2.41e-11
CYTIP	1.46e-05	0.49983	0.54	0.452	0.378305
C1orf162	1.88e-16	0.499655	0.964	0.874	4.89e-12
HTRA1	1.48e-07	0.499004	0.403	0.205	0.0038378
GBP2	2.51e-07	0.498904	0.518	0.355	0.00653133
MYADM	1.04e-06	0.498756	0.662	0.548	0.0269534
EIF4A2	1.27e-12	0.496682	0.935	0.901	3.31e-08
EIF4A3	0.000856641	0.495823	0.612	0.599	1
FCGR3A	1.98e-11	0.486604	0.921	0.751	5.15e-07
NAMPT	3.64e-06	0.483145	0.612	0.542	0.0947039
CKLF	9.51e-11	0.47975	0.806	0.643	2.47e-06
MCL1	1.85e-09	0.477928	0.856	0.826	4.8e-05
TUBA1A	5.93e-05	0.473762	0.705	0.7	1
STK38L	2.64e-09	0.473601	0.554	0.363	6.86e-05
CITED2	4.37e-05	0.472261	0.719	0.685	1
TSC22D3	2.56e-09	0.461063	0.906	0.857	6.64e-05
BRD2	1.49e-07	0.45966	0.77	0.711	0.00388067
RIPK2	0.000513648	0.458801	0.518	0.447	1
CLEC9A	1.01e-17	0.457565	0.223	0.018	2.61e-13
BTG1	1.58e-09	0.455146	0.942	0.899	4.11e-05
HLA-DPB1	1.72e-17	0.455013	1	0.989	4.46e-13
KBTBD8	1.11e-10	0.454039	0.388	0.167	2.89e-06
BCL2	8.17e-14	0.449895	0.482	0.205	2.12e-09
ZFP36L2	2.69e-10	0.449221	0.95	0.903	7e-06
HBEGF	0.0154337	0.44783	0.41	0.35	1
NLRP3	4.28e-06	0.438441	0.446	0.311	0.111111
ZFP36L1	6.33e-09	0.432156	0.885	0.85	0.000164609
SOX4	0.0131788	0.430565	0.252	0.183	1
CEBPD	1.54e-05	0.429094	0.921	0.861	0.400642
MEF2C	1.49e-14	0.427609	0.842	0.606	3.87e-10
NEDD9	2.58e-08	0.42686	0.338	0.152	0.00067037
CXorf21	5.35e-06	0.425049	0.482	0.339	0.139149
GAPT	1.45e-08	0.42387	0.576	0.361	0.000376884
PPP1R15B	0.000409316	0.418351	0.504	0.438	1
CKS2	0.0940129	0.412033	0.295	0.282	1
FCGR2C	1.02e-11	0.410828	0.554	0.289	2.66e-07
CSRNP1	1.37e-09	0.407962	0.41	0.189	3.55e-05
AC103591.3	6.67e-05	0.405668	0.273	0.152	1
MT-RNR2	2.66e-16	0.403692	1	1	6.91e-12
RBM39	8.7e-10	0.403301	0.928	0.885	2.26e-05
P3H2	3.07e-11	0.400143	0.374	0.137	7.99e-07
HLA-DOA	9.24e-11	0.399118	0.813	0.634	2.4e-06
ZBTB10	4.34e-05	0.394661	0.259	0.128	1
CORO1A	6.13e-08	0.389505	0.64	0.476	0.0015939
LPAR6	1.22e-07	0.388735	0.906	0.773	0.0031745
HIST1H2BG	0.00414182	0.387631	0.252	0.163	1
SERPINB9	1.75e-06	0.38634	0.439	0.286	0.045449
MRPL18	0.000164029	0.383357	0.604	0.568	1
ADRB2	6.96e-09	0.382179	0.374	0.174	0.000180919
SNHG8	0.000115794	0.381569	0.655	0.615	1
DDIT3	0.000152805	0.381301	0.468	0.348	1
LPGAT1	1.74e-06	0.380765	0.504	0.359	0.0451767
EGR3	4.76e-12	0.379581	0.245	0.051	1.24e-07
RBBP6	0.848822	0.368047	0.381	0.441	1
ALOX5AP	1.59e-09	0.366808	0.964	0.841	4.13e-05
MYLIP	0.000449809	0.365932	0.338	0.231	1
OLR1	6.77e-07	0.365866	0.849	0.705	0.0175939
H3F3B	2.42e-11	0.363174	1	0.993	6.3e-07
FZD1	5.89e-07	0.363107	0.367	0.198	0.0152995
GPR34	1.76e-10	0.362954	0.827	0.617	4.58e-06
DOCK4	2.79e-08	0.361224	0.547	0.372	0.000723893
C3AR1	1.42e-08	0.358936	0.885	0.731	0.000367902
OFD1	0.00019862	0.355357	0.345	0.233	1
MID1IP1	0.254845	0.354679	0.317	0.322	1
INPP5D	2.06e-06	0.351439	0.583	0.449	0.0535685
JUND	9.5e-05	0.351173	0.576	0.48	1
PRDM1	0.641372	0.350741	0.288	0.319	1
SH3KBP1	1.95e-07	0.350595	0.669	0.551	0.00506614
FOXN2	1.85e-05	0.345918	0.619	0.535	0.480046
P2RY12	4.9e-10	0.345512	0.424	0.196	1.27e-05
BCAS2	0.852268	0.344823	0.367	0.445	1
TIPARP	0.00133347	0.342102	0.482	0.425	1
MGAT4A	2.09e-06	0.34152	0.748	0.654	0.0543154
DUSP5	5.83e-06	0.3413	0.302	0.152	0.151405
PLAC8	0.00484262	0.339383	0.273	0.176	1
LTC4S	3.3e-08	0.339047	0.532	0.284	0.000856657
CLEC2B	0.000340144	0.336337	0.77	0.753	1
IFNGR1	1.1e-10	0.335175	0.95	0.936	2.86e-06
ANKRD36B	1.53e-11	0.335037	0.324	0.099	3.99e-07
DDX3X	0.000885182	0.333267	0.82	0.846	1
AL136987.1	1.23e-10	0.331098	0.209	0.042	3.2e-06
LPCAT2	1.77e-07	0.33047	0.799	0.722	0.00459653
IL1A	9.6e-06	0.328714	0.108	0.022	0.249565
PELI1	4.72e-05	0.326951	0.381	0.253	1
TAF7	0.000116868	0.326807	0.64	0.566	1
SRSF2	7.91e-07	0.326102	0.82	0.795	0.0205445
HPGDS	8.58e-09	0.325346	0.547	0.3	0.000222892
EEF1B2	1.28e-09	0.323846	0.971	0.938	3.33e-05
SORL1	6.98e-05	0.323482	0.647	0.546	1
PAK1	4.9e-08	0.318877	0.755	0.604	0.00127257
AC007032.1	4.65e-09	0.318426	0.209	0.053	0.000120875
PCED1B-AS1	0.00100306	0.31811	0.525	0.471	1
HIST1H4C	0.000309784	0.314625	0.41	0.306	1
KCTD12	1.11e-08	0.313959	0.921	0.901	0.00028894
ARL4A	0.0242098	0.312606	0.475	0.43	1
DSE	6.85e-05	0.31207	0.662	0.623	1
HLA-DRA	7.53e-13	0.31207	1	1	1.96e-08
FGL2	3.1e-07	0.311703	0.928	0.824	0.00804437
RTN1	3.31e-07	0.311424	0.475	0.286	0.0085991
RGS10	1.34e-08	0.311337	0.906	0.881	0.000347359
FCGR2A	5.61e-10	0.310323	0.95	0.89	1.46e-05
RNF149	0.000144225	0.310056	0.676	0.656	1
CNTRL	7.43e-05	0.309732	0.547	0.454	1
RPL22L1	0.000428727	0.309401	0.576	0.518	1
MNDA	7.26e-09	0.308106	0.978	0.881	0.000188733
EPB41L2	0.00153924	0.307808	0.511	0.458	1
S100A4	3.43e-08	0.305843	0.986	0.899	0.000892536
STK17A	0.000220884	0.3045	0.446	0.344	1
RUNX1	0.0011844	0.301948	0.59	0.568	1
MAFB	0.0282796	0.301824	0.878	0.877	1
PLCB2	0.000153154	0.301477	0.489	0.381	1
HDAC9	4.51e-05	0.301048	0.331	0.194	1
PTGS1	5.11e-05	0.297623	0.568	0.447	1
LAT2	4.69e-07	0.296933	0.705	0.531	0.0121959
CHORDC1	0.150896	0.295886	0.396	0.405	1
SATB1-AS1	1.38e-10	0.294995	0.201	0.04	3.58e-06
IL13RA1	4.55e-07	0.294837	0.827	0.802	0.0118169
SKIL	2.55e-06	0.294462	0.734	0.634	0.0663844
EIF5	0.00370661	0.293694	0.755	0.786	1
HNRNPD	1.62e-06	0.292546	0.849	0.835	0.042009
POU2F2	0.0047832	0.292319	0.345	0.262	1
VSIR	2.67e-06	0.291919	0.748	0.608	0.069279
TLR1	3.34e-05	0.291139	0.568	0.452	0.86778
AC109326.1	2.16e-09	0.29097	0.331	0.123	5.62e-05
GPRIN3	0.000113177	0.290075	0.777	0.729	1
SUSD3	5.72e-05	0.289596	0.345	0.203	1
CCDC50	0.000229796	0.287219	0.496	0.419	1
HNRNPDL	7.65e-09	0.285235	0.871	0.855	0.000198848
HNRNPU	0.0143488	0.285162	0.827	0.91	1
ELMO1	0.000251268	0.284217	0.403	0.289	1
FOXN3	0.000120548	0.283835	0.547	0.454	1
ZNF812P	4.81e-06	0.282124	0.187	0.062	0.125041
PCF11	0.00914884	0.281745	0.46	0.423	1
ITGA4	2.86e-07	0.279192	0.647	0.463	0.00743223
CD300A	0.00139355	0.278445	0.547	0.489	1
AMZ2P1	0.00217598	0.277612	0.288	0.196	1
EIF4E	0.0722333	0.276314	0.381	0.374	1
BLNK	0.000800254	0.27595	0.496	0.407	1
NFIL3	0.0693602	0.27486	0.266	0.227	1
SNAI1	4.3e-07	0.274036	0.201	0.064	0.0111873
BIRC3	0.776454	0.272492	0.216	0.229	1
SFPQ	5.37e-06	0.272461	0.813	0.802	0.139449
TM6SF1	0.000617046	0.27221	0.619	0.566	1
CH25H	0.172212	0.270822	0.245	0.205	1
OLFML3	4.49e-08	0.270654	0.468	0.225	0.00116752
SVBP	0.0148714	0.270588	0.453	0.425	1
HMGB2	0.0341562	0.270418	0.619	0.648	1
REL	0.000827294	0.270353	0.583	0.537	1
PRMT2	0.00192221	0.267888	0.626	0.606	1
RPS6KA3	0.00379968	0.265428	0.489	0.441	1
PIK3R1	0.000160893	0.26515	0.612	0.54	1
CLU	0.00819969	0.264321	0.806	0.806	1
DUSP6	0.0590516	0.262963	0.532	0.551	1
TRA2A	0.0267515	0.262696	0.41	0.39	1
CAMK2D	0.00369523	0.262689	0.367	0.282	1
PDE4B	0.105165	0.260699	0.259	0.225	1
AC079305.1	4.04e-07	0.26068	0.173	0.046	0.0104961
SKAP2	0.000112468	0.259893	0.719	0.681	1
MYC	0.600367	0.259353	0.353	0.443	1
PPP1R10	0.00960997	0.258972	0.424	0.363	1
CCL2	0.00157175	0.258873	0.482	0.377	1
RASSF4	0.000129055	0.25855	0.791	0.749	1
ARRDC3	0.00539247	0.257966	0.64	0.632	1
AMD1	0.00036656	0.256381	0.59	0.518	1
PREX1	0.00773731	0.256301	0.511	0.469	1
MT-RNR1	4.16e-08	0.256113	1	1	0.00108063
SLC2A3	0.322532	0.25577	0.331	0.335	1
HIST1H2BD	0.016173	0.255417	0.201	0.132	1
TLR2	0.000265299	0.254939	0.712	0.617	1
DNAJB6	0.0025972	0.254727	0.554	0.526	1
ETV5	0.000616782	0.253759	0.374	0.262	1
SESN1	0.00272647	0.253698	0.468	0.396	1
SOCS6	0.000771045	0.253094	0.396	0.306	1
PDP1	0.000360317	0.253047	0.353	0.24	1
GLS	0.000362384	0.252986	0.511	0.416	1
TNFSF18	7.72e-08	0.252447	0.115	0.015	0.00200679
HLA-DPA1	1.13e-07	0.251999	1	1	0.00294304
RHOC	3.64e-05	0.251906	0.719	0.612	0.944808
ANKRD22	4.07e-05	0.250526	0.403	0.244	1
TLR3	9.67e-05	0.250088	0.309	0.185	1
MR1	2.16e-09	-0.2505	0.151	0.465	5.61e-05
FGR	0.000815735	-0.250687	0.345	0.533	1
SGTB	3.44e-09	-0.250693	0.05	0.302	8.94e-05
PCBD1	1.92e-06	-0.250732	0.338	0.604	0.0499661
SLC43A3	1.21e-07	-0.251702	0.18	0.46	0.00315002
UQCRC1	9.86e-08	-0.251822	0.367	0.714	0.00256323
GLB1	8.74e-07	-0.252296	0.46	0.756	0.0227212
IFNAR1	2.3e-06	-0.252488	0.46	0.725	0.0597657
PSMA3	5.94e-07	-0.252778	0.468	0.742	0.0154273
C1QA	0.0783632	-0.253087	0.942	0.885	1
MCFD2	2.86e-09	-0.253577	0.194	0.513	7.44e-05
COX5B	3.16e-06	-0.253699	0.791	0.921	0.0820031
UQCRFS1	4.79e-07	-0.254035	0.345	0.632	0.0124424
CYFIP1	2.58e-05	-0.254169	0.482	0.718	0.67081
MTATP6P1	3.38e-06	-0.254326	0.885	0.958	0.0879685
ITGAX	5.48e-06	-0.254335	0.324	0.586	0.142435
CAPNS1	7.2e-06	-0.255026	0.59	0.808	0.187174
POLR2L	4.95e-07	-0.255031	0.453	0.729	0.0128621
COPA	2.39e-08	-0.25505	0.259	0.579	0.000620169
CLEC12A	0.000466321	-0.255158	0.237	0.416	1
TMEM251	7.42e-09	-0.255212	0.158	0.458	0.000192883
PDXK	3.38e-07	-0.255317	0.331	0.637	0.00879054
OAZ1	2.51e-10	-0.256714	0.978	0.996	6.53e-06
RNF181	1.14e-06	-0.257557	0.482	0.749	0.029596
ENPP2	6.28e-06	-0.257696	0.18	0.405	0.163182
TMEM37	6.26e-09	-0.258036	0.022	0.244	0.000162754
SCCPDH	9.45e-08	-0.258431	0.187	0.452	0.00245702
ATP6V0D2	4.02e-07	-0.258575	0	0.163	0.0104417
TMEM205	7.91e-08	-0.259258	0.259	0.573	0.00205532
C2	1.41e-05	-0.259427	0.101	0.284	0.367172
ERBIN	1.78e-08	-0.259472	0.23	0.542	0.000462626
ANXA6	4.81e-09	-0.259484	0.115	0.396	0.000125016
CMKLR1	9.16e-07	-0.260708	0.129	0.359	0.0238138
ABCG1	2.74e-10	-0.261712	0.079	0.385	7.11e-06
RPN2	2.42e-06	-0.263614	0.683	0.879	0.0628079
SRP14	6.28e-09	-0.265946	0.871	0.978	0.000163255
DNPH1	1.18e-08	-0.265957	0.209	0.533	0.000307596
ARF1	2.06e-07	-0.267246	0.763	0.93	0.00536371
COX6A1	7.03e-07	-0.267334	0.662	0.87	0.0182829
DDX60	5.78e-06	-0.267743	0.252	0.476	0.150175
DCAF7	2.54e-07	-0.268829	0.302	0.588	0.00661383
PRNP	1.67e-06	-0.269282	0.374	0.648	0.043317
UQCRB	8.99e-07	-0.270178	0.777	0.89	0.0233594
NUCB1	1.52e-06	-0.27035	0.468	0.729	0.0396185
SQOR	2.73e-05	-0.270464	0.518	0.736	0.710283
TNS3	1.29e-08	-0.271589	0.194	0.518	0.000334875
BLVRA	1.43e-07	-0.271614	0.273	0.57	0.00371693
SDC4	4.33e-08	-0.272196	0.101	0.357	0.00112638
THBD	8.8e-06	-0.272814	0.137	0.35	0.22883
NDUFA1	6.08e-07	-0.272908	0.669	0.861	0.0158059
CD14	0.000643466	-0.272946	0.863	0.912	1
PLPP3	1.19e-05	-0.273472	0.245	0.46	0.30816
ZEB2	4.6e-06	-0.27349	0.597	0.833	0.11953
ATP6V1H	1.63e-10	-0.274102	0.129	0.449	4.23e-06
TMEM50A	3.01e-07	-0.274215	0.626	0.883	0.00781024
MT-TP	7.35e-10	-0.274611	0.05	0.317	1.91e-05
RBMS1	7.97e-08	-0.275071	0.345	0.648	0.00207013
TPST2	7.96e-10	-0.27604	0.165	0.493	2.07e-05
MDH1	7.34e-07	-0.276455	0.626	0.826	0.0190858
POR	1.92e-07	-0.276779	0.201	0.482	0.00499361
MYO9B	1.68e-08	-0.277183	0.317	0.652	0.000437167
MGST1	3.83e-06	-0.277382	0.245	0.482	0.0996649
CD84	0.00089976	-0.277439	0.59	0.751	1
B3GNT2	6.81e-08	-0.277474	0.129	0.383	0.00177075
CANX	1.73e-07	-0.277919	0.914	0.952	0.00450347
FCGRT	1.51e-07	-0.278645	0.871	0.945	0.00392444
GYPC	1.05e-07	-0.278913	0.094	0.333	0.00273279
HK3	1.93e-09	-0.279186	0.065	0.33	5.02e-05
EIF4EBP1	2.47e-07	-0.279553	0.295	0.586	0.00640947
NINJ1	0.0002645	-0.280939	0.518	0.718	1
PLBD2	5.6e-09	-0.281021	0.122	0.41	0.000145557
SDHB	1.49e-07	-0.282424	0.403	0.692	0.00387042
HSD17B4	1.56e-08	-0.283278	0.331	0.623	0.00040446
TAPBP	2.53e-08	-0.28368	0.496	0.786	0.00065756
AP2S1	8.02e-08	-0.28398	0.784	0.883	0.00208512
PSMA7	8.97e-06	-0.284228	0.914	0.976	0.233231
MBD4	6.41e-08	-0.284307	0.281	0.586	0.00166503
TMEM138	2.59e-08	-0.28479	0.122	0.388	0.000673031
CYB561A3	3.87e-06	-0.285884	0.158	0.381	0.100487
CCR1	9.21e-07	-0.286075	0.331	0.615	0.0239422
PIK3AP1	9.66e-08	-0.286715	0.317	0.608	0.00251045
TTYH3	5.65e-08	-0.287704	0.187	0.471	0.00146967
KCNAB2	1.02e-10	-0.288687	0.144	0.482	2.66e-06
SLC7A8	1.44e-09	-0.288954	0.036	0.286	3.74e-05
CORO1C	4.23e-07	-0.289228	0.453	0.716	0.010993
ACOT13	1.03e-08	-0.290293	0.18	0.469	0.000266854
RAB13	4.38e-09	-0.290812	0.23	0.54	0.000113926
TM9SF2	4.51e-08	-0.291274	0.561	0.826	0.0011731
IGKC	4.06e-06	-0.291653	0.331	0.621	0.105614
THBS1	0.00178143	-0.292907	0.036	0.128	1
TNFRSF14	5.51e-08	-0.292989	0.252	0.533	0.00143303
BEX3	5.71e-05	-0.293862	0.245	0.445	1
MMP14	4.44e-07	-0.294245	0.338	0.593	0.0115491
CYBB	3.21e-05	-0.294461	0.921	0.958	0.835247
RGL1	1.81e-10	-0.294571	0.058	0.344	4.71e-06
UQCR10	2.68e-07	-0.294714	0.719	0.923	0.00697358
UGP2	1.89e-06	-0.295089	0.489	0.74	0.0491894
ARPC5	1.87e-08	-0.295501	0.878	0.971	0.000486964
APMAP	1.44e-08	-0.296674	0.295	0.608	0.000375178
RAB20	1.1e-10	-0.296698	0.129	0.452	2.86e-06
MGAT1	3.18e-06	-0.298519	0.612	0.833	0.0826677
ACE	7.08e-11	-0.299343	0.029	0.302	1.84e-06
SLC31A2	1.11e-08	-0.299847	0.388	0.683	0.000289646
ADAM10	1.18e-06	-0.300141	0.496	0.725	0.0307776
GUSB	5.95e-09	-0.300608	0.281	0.595	0.000154566
OAS3	2.25e-06	-0.301944	0.187	0.414	0.0584904
DMXL2	1.11e-10	-0.303075	0.151	0.502	2.89e-06
HTRA4	3.96e-09	-0.303326	0	0.211	0.000102882
OAS1	4.24e-06	-0.303814	0.374	0.608	0.110067
RALA	1.48e-07	-0.304975	0.309	0.586	0.00384454
PDIA6	9.48e-06	-0.305202	0.705	0.839	0.246374
ANXA11	1.58e-06	-0.305558	0.525	0.758	0.0410531
SEPHS2	1.28e-08	-0.306228	0.194	0.502	0.000333003
FERMT3	2.99e-09	-0.306391	0.374	0.707	7.78e-05
ATP5MC3	4.86e-08	-0.30706	0.77	0.896	0.00126399
HERC5	2.46e-08	-0.311038	0.086	0.337	0.000639664
PRDX4	1.86e-09	-0.312032	0.245	0.577	4.84e-05
RTN3	9.14e-08	-0.312909	0.597	0.806	0.00237543
BSG	1.36e-08	-0.313307	0.576	0.846	0.000353684
SYNGR2	7.65e-08	-0.313932	0.705	0.91	0.00198891
TMBIM6	4.39e-11	-0.314862	0.921	0.985	1.14e-06
RMDN3	9.54e-08	-0.315165	0.129	0.381	0.00248027
CYB5A	3.47e-11	-0.315473	0.122	0.467	9.01e-07
ENO1	7.96e-08	-0.317058	0.878	0.952	0.00206989
SERF2	2.07e-12	-0.319143	0.964	1	5.39e-08
HLA-DRB5	0.000173406	-0.3192	0.518	0.769	1
TMEM208	4.35e-11	-0.319612	0.201	0.564	1.13e-06
CCL8	0.0113416	-0.320249	0.036	0.106	1
SH3BGRL3	8.53e-08	-0.321394	0.957	0.993	0.00221642
TSPAN3	1.58e-09	-0.321499	0.317	0.65	4.1e-05
PLBD1	4.45e-07	-0.322028	0.496	0.747	0.011565
AGTRAP	8.53e-10	-0.322187	0.209	0.542	2.22e-05
GLIPR2	3.91e-08	-0.322419	0.237	0.54	0.0010156
CHCHD2	9.3e-08	-0.322534	0.806	0.932	0.0024161
UBE2D1	8.88e-09	-0.32269	0.324	0.623	0.000230767
COL4A3BP	3.45e-11	-0.322941	0.158	0.504	8.98e-07
ELOB	4.53e-07	-0.324772	0.763	0.868	0.0117651
FNIP2	3.96e-10	-0.325346	0.101	0.403	1.03e-05
ABHD12	7.28e-09	-0.325547	0.353	0.663	0.000189072
GNS	6.47e-09	-0.325592	0.468	0.784	0.000168073
EIF2AK2	9.41e-07	-0.326102	0.403	0.665	0.0244668
SCPEP1	2.45e-07	-0.328933	0.64	0.883	0.00637773
GNPTAB	1.18e-08	-0.330101	0.424	0.709	0.000306025
ATP6V1G1	1.47e-08	-0.330396	0.655	0.863	0.000383228
RRAGD	5.34e-15	-0.333382	0.036	0.399	1.39e-10
NPC1	1.63e-12	-0.335182	0.043	0.363	4.23e-08
UQCRQ	3.72e-09	-0.335517	0.547	0.835	9.66e-05
M6PR	2.44e-09	-0.335525	0.504	0.786	6.34e-05
VCP	5.34e-11	-0.33553	0.281	0.652	1.39e-06
CD164	6.71e-10	-0.335981	0.748	0.936	1.74e-05
ARRDC4	1.11e-09	-0.336181	0.094	0.377	2.89e-05
SMPDL3A	1.63e-11	-0.338456	0.007	0.278	4.23e-07
MT-ND4	7.45e-06	-0.3389	1	1	0.193737
LAPTM4A	2.9e-09	-0.339257	0.712	0.896	7.53e-05
CNBP	4.48e-10	-0.339516	0.777	0.914	1.16e-05
GNPTG	7.95e-11	-0.33974	0.403	0.74	2.07e-06
RNF130	1.4e-09	-0.340965	0.806	0.927	3.65e-05
AQP9	1.06e-09	-0.342901	0	0.225	2.76e-05
ENG	7.46e-09	-0.344023	0.353	0.652	0.000193759
LGALS2	6.36e-07	-0.344671	0.101	0.319	0.0165242
TPP1	4.22e-08	-0.344865	0.64	0.85	0.00109721
PKM	2.17e-09	-0.346093	0.899	0.945	5.63e-05
CLTA	5.17e-11	-0.349267	0.568	0.868	1.34e-06
ADAM9	1.18e-08	-0.349294	0.324	0.63	0.000306571
ANXA5	1.23e-10	-0.349589	0.906	0.971	3.19e-06
GAA	2.86e-11	-0.350274	0.317	0.689	7.43e-07
NRP2	1.08e-11	-0.350592	0.144	0.5	2.81e-07
B2M	4.17e-15	-0.351313	1	1	1.08e-10
STAB1	1.56e-05	-0.352434	0.237	0.445	0.405638
RNF13	4.62e-08	-0.353949	0.561	0.8	0.00120009
HM13	3.67e-09	-0.35572	0.547	0.828	9.53e-05
DBI	5.07e-09	-0.355848	0.799	0.923	0.000131801
IGF2R	3.38e-13	-0.356498	0.108	0.482	8.78e-09
GNPDA1	7.18e-10	-0.356667	0.324	0.65	1.87e-05
RAB42	1.36e-09	-0.356836	0.036	0.28	3.54e-05
ATP1B3	1.28e-10	-0.358619	0.482	0.808	3.33e-06
CALU	1e-12	-0.358908	0.223	0.623	2.61e-08
FPR3	1.74e-07	-0.3593	0.504	0.758	0.00453107
NR1H3	3.6e-12	-0.360213	0.022	0.317	9.36e-08
HSP90B1	7.2e-10	-0.361605	0.878	0.976	1.87e-05
NRP1	1.32e-07	-0.362471	0.281	0.559	0.00342879
RNH1	1.69e-10	-0.363323	0.626	0.866	4.39e-06
ATP6AP2	2.06e-09	-0.363408	0.763	0.943	5.36e-05
C1QC	0.00715228	-0.365873	0.928	0.863	1
DYNLT1	4.64e-10	-0.365991	0.353	0.689	1.21e-05
FABP5	0.000244278	-0.366871	0.432	0.606	1
RSAD2	0.000139896	-0.366907	0.115	0.282	1
LMNA	4.99e-09	-0.36806	0.165	0.449	0.000129798
OSCAR	8.07e-11	-0.369631	0.266	0.608	2.1e-06
CSTA	1.7e-06	-0.37043	0.482	0.709	0.0440725
CISH	3.74e-12	-0.375792	0.137	0.489	9.72e-08
TMED10	5.78e-11	-0.377871	0.604	0.868	1.5e-06
S100A11	5.1e-11	-0.378557	0.993	0.998	1.32e-06
ZNF706	3.46e-10	-0.381265	0.518	0.806	9.01e-06
TGM2	2.92e-10	-0.381378	0.007	0.251	7.6e-06
IFIH1	1.89e-08	-0.381525	0.23	0.507	0.000489954
ADAMDEC1	1.18e-07	-0.381604	0.007	0.189	0.00307319
VIM	3.1e-08	-0.382082	0.993	0.996	0.000806576
MGLL	3.92e-11	-0.382356	0.029	0.308	1.02e-06
IGSF6	3.92e-06	-0.382906	0.914	0.936	0.101956
DCXR	1.6e-06	-0.383778	0.302	0.548	0.0416085
LACTB	1.59e-10	-0.386926	0.36	0.689	4.12e-06
SLC38A6	5.63e-14	-0.390027	0.086	0.445	1.46e-09
ATP6V1D	2.08e-12	-0.39047	0.281	0.648	5.4e-08
IL4I1	8.17e-10	-0.391124	0.094	0.379	2.12e-05
FTLP3	8.34e-13	-0.396902	0.158	0.504	2.17e-08
TDP2	3e-09	-0.398906	0.187	0.487	7.79e-05
TCN2	4.01e-10	-0.401321	0.065	0.337	1.04e-05
NCEH1	1.65e-14	-0.401334	0.129	0.531	4.29e-10
SDCBP	9.1e-11	-0.404978	0.777	0.945	2.37e-06
TIMP1	3.76e-07	-0.406661	0.597	0.826	0.0097603
SCD	3.57e-08	-0.408744	0.151	0.41	0.000928714
CTSK	1.72e-05	-0.409507	0.007	0.137	0.446528
LAP3	6.35e-11	-0.412682	0.576	0.857	1.65e-06
MT-ND5	7.44e-14	-0.413875	0.993	0.998	1.93e-09
MYDGF	1.67e-12	-0.413965	0.439	0.784	4.35e-08
ADA2	6.62e-10	-0.414907	0.504	0.742	1.72e-05
ANPEP	3.93e-14	-0.419555	0.029	0.374	1.02e-09
ID3	2.06e-06	-0.419602	0.331	0.579	0.0536088
HEXA	3.23e-13	-0.420402	0.374	0.742	8.41e-09
PTAFR	2.11e-09	-0.420468	0.691	0.863	5.49e-05
SIGLEC1	2.21e-12	-0.42172	0.144	0.496	5.73e-08
TXNRD1	1.27e-09	-0.421783	0.295	0.61	3.3e-05
CYSTM1	2.94e-13	-0.423503	0.18	0.559	7.63e-09
SQSTM1	3.36e-06	-0.424922	0.698	0.866	0.0874388
ATP6AP1	2.48e-13	-0.425151	0.655	0.872	6.44e-09
NDUFB9	4.25e-09	-0.425497	0.54	0.786	0.00011051
MGST3	4.18e-10	-0.425615	0.554	0.804	1.09e-05
NOP10	2.27e-09	-0.427174	0.705	0.861	5.89e-05
TKT	2.77e-09	-0.431596	0.647	0.861	7.21e-05
DNASE2	5.36e-09	-0.432405	0.432	0.714	0.000139352
TNFAIP2	1.31e-12	-0.433276	0.187	0.566	3.4e-08
S100A10	6.92e-07	-0.434748	0.871	0.956	0.0179879
OAS2	1.85e-12	-0.437156	0.245	0.606	4.8e-08
MPP1	6.02e-11	-0.437203	0.374	0.694	1.56e-06
PGD	4.94e-11	-0.437597	0.353	0.694	1.28e-06
SLAMF7	0.000120778	-0.439909	0.086	0.236	1
IFITM3	0.000448511	-0.440572	0.914	0.947	1
CALR	2.27e-10	-0.45089	0.791	0.941	5.9e-06
IGHG4	0.00486563	-0.453325	0.137	0.271	1
SPARC	1.29e-09	-0.45684	0.158	0.454	3.35e-05
LY96	4.91e-12	-0.458314	0.424	0.751	1.27e-07
C1QB	0.00235081	-0.45851	0.899	0.872	1
CHIT1	6.55e-06	-0.463165	0	0.132	0.170128
LGALS1	2.66e-09	-0.463175	0.878	0.969	6.92e-05
PPARG	1.51e-11	-0.463283	0.058	0.355	3.91e-07
SLAMF8	4.69e-12	-0.466397	0.36	0.72	1.22e-07
GSTP1	9.41e-13	-0.467129	0.914	0.958	2.44e-08
IQGAP2	2.9e-13	-0.47017	0.288	0.685	7.53e-09
TBC1D2	4.87e-15	-0.470455	0.065	0.43	1.26e-10
IGLC2	0.32566	-0.47351	0.122	0.165	1
COLEC12	2.91e-14	-0.473564	0.029	0.37	7.55e-10
PLAUR	2.9e-07	-0.474077	0.46	0.729	0.00754107
ATP6V1A	1.88e-16	-0.474418	0.317	0.729	4.87e-12
CD81	1.08e-11	-0.479791	0.705	0.885	2.8e-07
ABCA1	2.57e-16	-0.481554	0.115	0.546	6.68e-12
SOAT1	4.05e-09	-0.481676	0.482	0.764	0.00010533
CAPG	1.91e-11	-0.482286	0.921	0.954	4.97e-07
CD163	1.66e-06	-0.482862	0.712	0.841	0.0431417
ATP6V0D1	1.06e-12	-0.487851	0.46	0.793	2.75e-08
MT-CO2	2.23e-13	-0.489286	0.993	0.998	5.79e-09
GLMP	6.23e-15	-0.490155	0.173	0.568	1.62e-10
CD44	2.13e-12	-0.490956	0.683	0.941	5.53e-08
IFIT1	1.69e-06	-0.491756	0.187	0.421	0.0438603
ALDH1A1	3.13e-10	-0.493222	0.115	0.403	8.13e-06
ATP6V0B	4.13e-16	-0.499802	0.777	0.938	1.07e-11
LAMP2	1.29e-16	-0.502435	0.612	0.896	3.37e-12
BCAP31	7.79e-14	-0.503245	0.554	0.85	2.03e-09
ATOX1	2.3e-13	-0.507556	0.468	0.795	5.97e-09
SCARB2	2.9e-15	-0.507997	0.367	0.744	7.54e-11
EPHX1	9.73e-12	-0.510315	0.094	0.414	2.53e-07
GDF15	9.01e-05	-0.511198	0.072	0.218	1
LAMP1	6.91e-13	-0.512224	0.439	0.76	1.8e-08
CALM3	9.16e-13	-0.51327	0.345	0.694	2.38e-08
P4HB	1.24e-15	-0.514989	0.453	0.791	3.21e-11
RAP2B	7e-15	-0.517979	0.317	0.696	1.82e-10
CD36	1.22e-10	-0.51805	0.065	0.35	3.17e-06
HLA-A	3.39e-17	-0.520449	0.921	0.996	8.82e-13
FLNA	1.65e-12	-0.527034	0.331	0.681	4.29e-08
MX1	3.3e-09	-0.530044	0.432	0.705	8.58e-05
MCEMP1	3.99e-06	-0.530564	0.043	0.211	0.10376
LRPAP1	7.84e-15	-0.538164	0.475	0.817	2.04e-10
TFRC	2.75e-09	-0.538311	0.129	0.405	7.15e-05
NCF2	1.11e-14	-0.539004	0.432	0.802	2.87e-10
GPX4	1.15e-15	-0.544568	0.827	0.967	2.99e-11
CD59	7.59e-14	-0.549571	0.302	0.639	1.97e-09
CCL17	0.00151571	-0.551052	0.086	0.211	1
BLVRB	4.96e-13	-0.552336	0.345	0.707	1.29e-08
APLP2	2.74e-19	-0.563633	0.799	0.976	7.11e-15
ANXA2	4.96e-16	-0.569608	0.942	0.987	1.29e-11
DAB2	1.6e-14	-0.569741	0.576	0.863	4.16e-10
VAT1	1.32e-16	-0.574724	0.187	0.599	3.42e-12
IFIT3	6.78e-13	-0.586308	0.216	0.59	1.76e-08
GRINA	1.52e-17	-0.586947	0.453	0.813	3.96e-13
TALDO1	4.72e-15	-0.589037	0.59	0.888	1.23e-10
IL7R	2.01e-10	-0.592782	0.043	0.315	5.23e-06
PLTP	6.32e-11	-0.597041	0.144	0.456	1.64e-06
LPL	3.32e-07	-0.600129	0.072	0.28	0.00862102
IGHG3	0.165235	-0.60132	0.129	0.189	1
TIMP2	3.61e-17	-0.601537	0.317	0.725	9.39e-13
CPM	5.09e-14	-0.61198	0.309	0.687	1.32e-09
CD68	2.16e-21	-0.615647	0.302	0.756	5.61e-17
CFD	9.01e-12	-0.618691	0.201	0.546	2.34e-07
SERPING1	7.53e-11	-0.619104	0.345	0.65	1.96e-06
EMP1	3.22e-12	-0.623083	0.115	0.445	8.37e-08
GSTO1	4.02e-19	-0.628043	0.662	0.901	1.04e-14
PRDX1	1.98e-19	-0.641454	0.899	0.976	5.13e-15
MT-TE	5.21e-18	-0.649767	0.122	0.546	1.35e-13
MS4A4A	1.62e-14	-0.658463	0.345	0.727	4.21e-10
IDH1	6.45e-18	-0.6629	0.23	0.648	1.67e-13
GCHFR	1.01e-11	-0.667714	0.129	0.452	2.61e-07
ATP6V1F	3.48e-23	-0.667852	0.727	0.947	9.04e-19
PMP22	1.09e-14	-0.669701	0.252	0.617	2.83e-10
TSPAN4	5.81e-24	-0.678131	0.058	0.573	1.51e-19
HEXB	2.28e-21	-0.689143	0.712	0.919	5.94e-17
GLUL	2.26e-16	-0.691531	0.835	0.969	5.86e-12
LY6E	7.43e-15	-0.708916	0.561	0.835	1.93e-10
C15orf48	9.68e-08	-0.712488	0.187	0.436	0.00251477
GRN	1.73e-27	-0.717879	0.95	0.998	4.51e-23
CTSC	4.04e-16	-0.72025	0.856	0.969	1.05e-11
BRI3	1.93e-13	-0.722614	0.755	0.91	5.02e-09
PPDPF	1.63e-20	-0.723492	0.612	0.894	4.24e-16
FUCA1	2.68e-12	-0.742963	0.288	0.637	6.97e-08
FOLR2	7.42e-10	-0.744117	0.173	0.467	1.93e-05
FTH1	1.28e-11	-0.762463	1	1	3.32e-07
NPL	1.64e-20	-0.777766	0.137	0.588	4.27e-16
RNASE1	1.24e-05	-0.779801	0.043	0.196	0.321299
MARCO	5.59e-10	-0.784328	0.022	0.269	1.45e-05
IGHG1	9.74e-06	-0.790327	0.237	0.48	0.253047
CTSS	2.96e-25	-0.795478	0.993	0.996	7.7e-21
SMIM25	6.24e-23	-0.807253	0.043	0.529	1.62e-18
LTA4H	4.87e-15	-0.820418	0.374	0.727	1.27e-10
CD63	3.72e-34	-0.82291	0.957	0.991	9.67e-30
CTSZ	1.09e-21	-0.825318	0.842	0.965	2.83e-17
SPP1	0.829925	-0.829387	0.475	0.52	1
ISG15	2.17e-12	-0.834714	0.36	0.722	5.64e-08
CTSA	1.02e-27	-0.842193	0.432	0.872	2.65e-23
SLC40A1	2.83e-05	-0.84285	0.245	0.43	0.735062
TMEM176A	5.12e-20	-0.862853	0.381	0.771	1.33e-15
GM2A	1.74e-18	-0.895158	0.36	0.727	4.53e-14
FBP1	3.44e-13	-0.899059	0.36	0.687	8.93e-09
TMEM176B	1.16e-21	-0.921214	0.518	0.85	3e-17
VCAN	7.01e-08	-0.931193	0.086	0.306	0.00182273
MMP9	9.57e-07	-0.944779	0.065	0.26	0.0248827
ASAH1	2.44e-30	-0.961017	0.669	0.949	6.35e-26
LIPA	1.3e-14	-0.969788	0.532	0.795	3.39e-10
HMOX1	0.00870004	-0.971742	0.604	0.751	1
CREG1	1.62e-26	-0.985178	0.604	0.874	4.22e-22
CHI3L1	5.45e-10	-1.00308	0.014	0.256	1.42e-05
PLA2G7	1.45e-19	-1.03868	0.079	0.507	3.78e-15
CD52	1.27e-08	-1.04512	0.518	0.749	0.000329126
NUPR1	8.71e-15	-1.05247	0.173	0.535	2.26e-10
FCN1	4.42e-10	-1.08766	0.043	0.302	1.15e-05
CYP27A1	8.89e-23	-1.09186	0.05	0.535	2.31e-18
PLD3	1.44e-20	-1.09366	0.475	0.811	3.73e-16
CTSB	6.76e-36	-1.11076	0.978	0.996	1.76e-31
IFI27	6.47e-06	-1.11218	0.23	0.425	0.168277
S100A8	6.23e-14	-1.13851	0.065	0.407	1.62e-09
IFI6	7.54e-21	-1.1513	0.647	0.91	1.96e-16
PSAP	1.5e-45	-1.16026	1	1	3.89e-41
FTL	4.04e-32	-1.24837	1	1	1.05e-27
TXN	4.49e-26	-1.27835	0.576	0.89	1.17e-21
LYZ	8.39e-20	-1.29533	0.957	0.993	2.18e-15
SELENOP	2.52e-06	-1.31428	0.122	0.324	0.0654082
CCL13	3.78e-09	-1.35803	0.058	0.297	9.81e-05
APOE	1.28e-13	-1.38055	0.655	0.819	3.32e-09
MRC1	2.55e-26	-1.38938	0.417	0.835	6.64e-22
LGMN	3.66e-20	-1.39596	0.18	0.634	9.51e-16
CXCL10	0.218532	-1.44409	0.094	0.134	1
S100A9	2.84e-21	-1.48472	0.129	0.59	7.37e-17
LGALS3	7.94e-34	-1.49235	0.64	0.925	2.06e-29
CSTB	1.16e-32	-1.52615	0.835	0.974	3e-28
ACP5	1.85e-30	-1.67308	0.201	0.742	4.81e-26
APOC1	5.19e-24	-1.69219	0.525	0.846	1.35e-19
CTSL	2.29e-25	-1.73237	0.374	0.804	5.95e-21
CTSD	1.73e-36	-1.85696	0.755	0.947	4.5e-32
CCL18	2.12e-12	-2.11495	0.079	0.394	5.51e-08
GPNMB	1.53e-36	-2.27184	0.317	0.822	3.97e-32

## Sheet: P21120201.clusterMacrophages2_d
gene_id	p_val	avg_logFC	pct.1	pct.2	p_val_adj
CHI3L1	1.81133e-33	1.46447	0.549	0.098	4.70746e-29
CSTB	1.1991e-46	1.35822	1	0.924	3.11635e-42
IGHG1	0.444766	1.34848	0.414	0.426	1
APOC1	1.0374e-32	1.34651	0.985	0.709	2.6961e-28
MARCO	8.59768e-33	1.3382	0.564	0.109	2.23445e-28
FBP1	4.6264e-35	1.29564	0.91	0.524	1.20236e-30
IGHG3	0.758569	1.27198	0.173	0.176	1
CD52	8.98409e-19	1.19701	0.895	0.637	2.33488e-14
CYP27A1	1.96997e-50	1.19358	0.917	0.278	5.11977e-46
LTA4H	2.35356e-35	1.14376	0.925	0.563	6.11666e-31
MMP9	3.04802e-06	1.09355	0.353	0.174	0.0792149
MCEMP1	8.29599e-32	1.03993	0.504	0.076	2.15604e-27
IGLC2	0.606654	1.0212	0.173	0.15	1
NUPR1	1.51845e-24	1.00768	0.782	0.354	3.9463e-20
TFRC	8.06031e-28	1.00543	0.684	0.241	2.09479e-23
FTH1	7.85886e-40	0.982206	1	1	2.04244e-35
LPL	9.09668e-27	0.968057	0.564	0.135	2.36414e-22
IGHG4	0.457558	0.959096	0.271	0.23	1
GCHFR	1.39422e-24	0.933483	0.699	0.283	3.62345e-20
LGALS3	6.68506e-28	0.925436	1	0.817	1.73738e-23
ACP5	1.72534e-22	0.911156	0.895	0.535	4.48399e-18
SMIM25	7.47933e-42	0.87831	0.872	0.283	1.9438e-37
LIPA	5.06629e-16	0.862425	0.865	0.696	1.31668e-11
S100A9	2.72457e-21	0.840322	0.789	0.393	7.08089e-17
GPNMB	1.8458e-25	0.817117	0.985	0.622	4.79705e-21
TXN	4.07218e-24	0.810854	0.985	0.767	1.05832e-19
SPARC	5.15755e-21	0.801516	0.662	0.304	1.3404e-16
PPARG	6.56118e-41	0.795558	0.722	0.159	1.70518e-36
RGCC	1.23211e-11	0.752099	0.662	0.387	3.20214e-07
GDF15	5.61645e-18	0.73757	0.436	0.111	1.45966e-13
FGR	3.32363e-26	0.733149	0.835	0.389	8.63777e-22
CTSD	4.2168e-23	0.713125	0.992	0.876	1.09591e-18
APOE	5.72329e-14	0.69093	0.94	0.735	1.48743e-09
GM2A	5.66739e-15	0.679717	0.887	0.57	1.4729e-10
S100A8	3.57503e-14	0.675354	0.586	0.252	9.29114e-10
FTL	7.84017e-24	0.648448	1	1	2.03758e-19
SLC11A1	7.59512e-15	0.640425	0.759	0.424	1.9739e-10
BRI3	5.67886e-15	0.636028	0.955	0.85	1.47588e-10
CTSS	7.10388e-18	0.634737	1	0.993	1.84623e-13
SLAMF7	8.80897e-10	0.63408	0.383	0.148	2.28936e-05
PLAUR	5.58085e-17	0.626104	0.895	0.6	1.45041e-12
AQP9	4.70623e-33	0.622348	0.511	0.074	1.2231e-28
SCD	5.24944e-19	0.620678	0.647	0.263	1.36428e-14
MT1G	0.00270482	0.617032	0.398	0.257	1
IL1RN	3.56492e-05	0.606907	0.436	0.267	0.926488
CHIT1	5.83907e-18	0.599936	0.301	0.043	1.51752e-13
PPDPF	1.5759e-17	0.592742	0.97	0.787	4.0956e-13
HEXB	2.36036e-17	0.579864	0.947	0.848	6.13434e-13
CD44	3.70117e-18	0.578669	0.985	0.85	9.61897e-14
HSD11B1	2.09878e-20	0.577635	0.256	0.02	5.45453e-16
EMP1	9.1048e-12	0.565285	0.609	0.298	2.36625e-07
VIM	1.20703e-18	0.554427	1	0.993	3.13694e-14
TIMP3	0.00654756	0.548563	0.195	0.104	1
FLNA	1.7122e-15	0.54743	0.842	0.528	4.44984e-11
FABP5	8.18479e-11	0.539929	0.782	0.502	2.12715e-06
ASAH1	2.96653e-19	0.532595	0.992	0.852	7.70971e-15
MT-ND4	2.04689e-16	0.523446	1	1	5.31968e-12
GPX4	2.49135e-19	0.521441	0.985	0.92	6.47478e-15
INHBA	2.99395e-08	0.514194	0.18	0.041	0.000778098
VSIG4	0.00014113	0.506379	0.767	0.713	1
C15orf48	1.26091e-12	0.502784	0.624	0.307	3.27697e-08
NDUFB9	1.06351e-11	0.50167	0.895	0.68	2.76395e-07
S100A6	1.46725e-14	0.499833	0.985	0.989	3.81324e-10
MT-CO2	1.31226e-16	0.496688	0.992	0.998	3.41044e-12
TBC1D2	1.86396e-20	0.483962	0.669	0.25	4.84424e-16
PIM1	5.71419e-11	0.483609	0.526	0.246	1.48506e-06
CTSK	6.66297e-11	0.482417	0.256	0.063	1.73164e-06
S100A10	6.91335e-07	0.480995	0.992	0.92	0.0179671
ELOB	3.17812e-15	0.479861	0.94	0.815	8.25961e-11
GSTO1	2.69955e-16	0.47655	0.962	0.811	7.01586e-12
BCAP31	1.44965e-14	0.475171	0.947	0.733	3.76751e-10
CYSTM1	1.12076e-17	0.472634	0.759	0.387	2.91274e-13
CCL20	0.146037	0.469195	0.12	0.083	1
SDC2	3.69428e-08	0.466026	0.617	0.363	0.000960105
NCF2	1.31781e-11	0.464757	0.865	0.672	3.42486e-07
CCRL2	2.66986e-13	0.464596	0.594	0.274	6.9387e-09
CD63	3.64176e-17	0.462698	1	0.978	9.46458e-13
MT-ND2	5.00079e-08	0.461185	1	1	0.00129966
ALDH1A1	5.31318e-13	0.459999	0.586	0.263	1.38084e-08
RMDN3	7.0847e-17	0.453864	0.609	0.239	1.84124e-12
NR1H3	7.60805e-17	0.44992	0.519	0.17	1.97726e-12
VAT1	4.383e-16	0.449768	0.789	0.42	1.1391e-11
NOP10	6.6949e-15	0.44904	0.932	0.793	1.73994e-10
CFD	7.3373e-07	0.4482	0.639	0.415	0.0190689
EMP3	0.0551894	0.447156	0.932	0.904	1
PGD	1.69222e-10	0.446428	0.805	0.559	4.39791e-06
APLP2	3.37367e-14	0.44091	0.992	0.917	8.76783e-10
CXCL16	2.52524e-11	0.439233	0.955	0.863	6.56284e-07
TALDO1	4.92862e-12	0.436886	0.955	0.778	1.2809e-07
ANXA2	6.46797e-11	0.432478	1	0.97	1.68096e-06
LYZ	2.25112e-08	0.431126	0.992	0.983	0.000585044
TIMP1	0.0266535	0.429563	0.835	0.754	1
SPP1	0.594676	0.428737	0.526	0.504	1
TAGLN2	1.34736e-07	0.428292	0.94	0.826	0.00350165
GLIPR2	2.68782e-11	0.427572	0.684	0.407	6.98538e-07
ACSL1	9.15863e-13	0.426395	0.692	0.385	2.38024e-08
HTRA4	1.67852e-18	0.425481	0.406	0.091	4.36231e-14
ARL4A	3.39973e-10	0.423066	0.654	0.378	8.83555e-06
TKT	7.69173e-07	0.422525	0.842	0.802	0.01999
LAMP1	3.15789e-13	0.421137	0.902	0.622	8.20704e-09
TMBIM1	3.31085e-13	0.420616	0.887	0.613	8.60456e-09
ATP6V1F	2.59049e-11	0.413757	0.985	0.87	6.73243e-07
GPCPD1	4.40458e-10	0.413706	0.789	0.563	1.14471e-05
RETN	0.00963298	0.413252	0.316	0.217	1
MGST3	4.28803e-10	0.410857	0.872	0.709	1.11442e-05
CPM	5.81471e-08	0.410751	0.774	0.548	0.00151119
ADAM10	4.99776e-08	0.406936	0.797	0.635	0.00129887
SNX10	5.80768e-07	0.404022	0.887	0.761	0.0150936
PLIN2	6.51963e-09	0.401219	0.947	0.802	0.000169439
SPN	3.70113e-08	0.397424	0.632	0.387	0.000961885
MGST1	3.00413e-07	0.395007	0.594	0.378	0.00780743
LRRC75A-AS1	1.38002e-06	0.392451	0.895	0.785	0.0358653
ITGAX	2.35891e-11	0.39101	0.767	0.454	6.13057e-07
DCXR	2.41773e-07	0.387267	0.669	0.439	0.00628344
ARRDC4	1.59457e-07	0.385142	0.474	0.263	0.00414413
SH3BP5	2.56899e-13	0.385069	0.556	0.224	6.67655e-09
FCMR	1.44768e-11	0.375356	0.278	0.07	3.76237e-07
BSG	6.03443e-12	0.373268	0.955	0.733	1.56829e-07
CAPG	8.55442e-09	0.372142	0.962	0.941	0.000222321
IL3RA	7.62754e-14	0.372038	0.331	0.08	1.98232e-09
C6orf48	0.00030639	0.37073	0.767	0.646	1
NCEH1	9.2387e-11	0.36872	0.677	0.367	2.40105e-06
CD55	9.45607e-10	0.367513	0.677	0.402	2.45754e-05
CLEC12A	6.66755e-09	0.366626	0.571	0.317	0.000173283
S100A11	2.57714e-13	0.365336	1	0.996	6.69774e-09
DBI	6.69228e-06	0.365057	0.955	0.876	0.173926
LAMP2	5.68293e-12	0.359728	0.955	0.793	1.47694e-07
CTSL	2.33584e-11	0.359622	0.925	0.639	6.07061e-07
MITF	2.60173e-13	0.359326	0.624	0.298	6.76163e-09
UPP1	5.93759e-08	0.35913	0.865	0.615	0.00154312
CA2	4.07225e-07	0.358478	0.406	0.204	0.0105834
PSMA7	2.40947e-09	0.355943	0.992	0.952	6.26197e-05
BLOC1S2	8.12067e-09	0.354053	0.744	0.452	0.000211048
CD68	7.36504e-13	0.353013	0.88	0.583	1.9141e-08
PLPP3	4.85241e-08	0.349294	0.609	0.352	0.00126109
GRINA	8.46813e-10	0.34922	0.895	0.68	2.20078e-05
SDCBP	1.15169e-11	0.348951	0.977	0.885	2.99313e-07
PHLDA3	1.83549e-21	0.347701	0.383	0.065	4.77025e-17
SERPING1	0.0301462	0.347177	0.677	0.55	1
RASGEF1B	3.36727e-06	0.346745	0.519	0.322	0.0875121
MT-ND4L	2.22266e-07	0.344976	0.97	0.935	0.00577648
TXNRD1	9.71637e-09	0.344493	0.729	0.48	0.000252519
CALM3	4.25672e-05	0.344025	0.767	0.567	1
ATOX1	3.03095e-08	0.34343	0.887	0.67	0.000787714
DCSTAMP	2.52878e-18	0.342357	0.331	0.057	6.57205e-14
ARID5B	7.71675e-07	0.341813	0.496	0.274	0.0200551
SDC4	1.50735e-10	0.341691	0.511	0.235	3.91745e-06
ZFAS1	1.51974e-05	0.341393	0.82	0.678	0.394965
ATP6V0B	6.68033e-10	0.33937	0.985	0.876	1.73615e-05
PSAP	2.24321e-15	0.337451	1	1	5.82988e-11
ANPEP	8.42684e-07	0.336009	0.459	0.246	0.0219005
CD9	0.00197115	0.335877	0.917	0.887	1
CDA	5.67143e-18	0.335076	0.338	0.059	1.47395e-13
SOD2	1.91089e-09	0.33372	0.797	0.52	4.96621e-05
CYB5A	5.36673e-09	0.333353	0.579	0.33	0.000139476
HLA-A	1.28127e-07	0.331469	1	0.972	0.00332989
HK3	1.49997e-12	0.331406	0.504	0.2	3.89827e-08
LINC00847	7.22223e-13	0.330691	0.489	0.183	1.87699e-08
BCL2A1	1.30626e-11	0.328792	0.872	0.55	3.39484e-07
C1orf122	4.05484e-08	0.327478	0.571	0.335	0.00105381
MT-CO1	7.16168e-11	0.325166	1	1	1.86125e-06
SEMA3C	4.60493e-21	0.322529	0.398	0.07	1.19677e-16
LRPAP1	7.94391e-06	0.322088	0.857	0.702	0.206454
OSCAR	1.05054e-07	0.321884	0.699	0.478	0.00273026
ANXA1	0.0668942	0.321861	0.947	0.943	1
ABHD5	4.47556e-14	0.320193	0.444	0.141	1.16315e-09
CCL23	1.59284e-06	0.319491	0.165	0.046	0.0413963
DENND4C	1.07971e-09	0.318033	0.564	0.287	2.80605e-05
GADD45A	0.065487	0.317541	0.316	0.243	1
PRDX1	1.12555e-09	0.314275	1	0.946	2.92519e-05
NCF1C	0.00139393	0.313975	0.489	0.346	1
FTLP3	1.26812e-12	0.312398	0.692	0.346	3.29571e-08
SOAT1	2.03223e-05	0.312395	0.82	0.663	0.528156
KYNU	9.50058e-07	0.310371	0.662	0.45	0.0246911
AGTRAP	3.1786e-08	0.3096	0.669	0.404	0.000826086
CLEC4E	4.42982e-11	0.309469	0.496	0.204	1.15127e-06
ATP6V1E1	2.18961e-08	0.309101	0.827	0.559	0.000569058
SLC29A3	1.35539e-08	0.309053	0.474	0.237	0.000352252
GRN	0.000630975	0.308875	1	0.983	1
ANXA5	7.77586e-10	0.307239	0.992	0.946	2.02087e-05
C5AR1	0.000147709	0.307221	0.752	0.513	1
RPL14	2.92374e-05	0.306136	1	0.993	0.75985
FADS1	8.82388e-07	0.303258	0.444	0.233	0.0229324
FNIP2	4.16893e-08	0.302963	0.534	0.274	0.00108346
CLIP4	2.0151e-12	0.302695	0.444	0.167	5.23703e-08
WARS	9.66507e-09	0.300946	0.759	0.493	0.000251185
DNASE2	0.00360063	0.299705	0.737	0.622	1
RPS8	2.27309e-05	0.298957	0.992	0.98	0.590753
SNHG6	5.7512e-05	0.29768	0.812	0.62	1
SERPINE1	2.7089e-09	0.29703	0.233	0.061	7.04017e-05
SLC3A2	9.24647e-07	0.296795	0.835	0.633	0.0240307
TCF7L2	6.69409e-12	0.296573	0.331	0.093	1.73973e-07
CD36	0.000841657	0.296157	0.398	0.25	1
OPTN	8.39436e-12	0.29601	0.406	0.139	2.18161e-07
PCOLCE2	1.47733e-12	0.29471	0.195	0.026	3.83942e-08
MCRIP2	6.158e-10	0.293741	0.474	0.213	1.6004e-05
YBX1	7.44707e-09	0.29278	0.977	0.933	0.000193542
TMEM38B	3.11291e-12	0.292144	0.398	0.137	8.09013e-08
CHCHD10	4.05523e-07	0.292096	0.887	0.693	0.0105391
NAP1L1	2.85637e-06	0.29071	0.91	0.789	0.0742342
OSBPL8	0.00752782	0.290087	0.812	0.657	1
PABPC4	1.12264e-05	0.287233	0.677	0.47	0.291763
RAB13	4.80853e-08	0.28679	0.662	0.411	0.00124969
SH3BGRL3	2.99413e-06	0.286685	0.992	0.983	0.0778143
CXXC5	5.29253e-10	0.286242	0.511	0.23	1.37548e-05
TNFSF14	7.94643e-12	0.285921	0.195	0.028	2.0652e-07
RPS27L	2.48352e-06	0.285339	0.947	0.8	0.0645442
TMED5	1.12449e-08	0.284263	0.857	0.572	0.000292245
MAP1LC3B	8.51567e-05	0.283493	0.895	0.763	1
ATP13A3	6.04362e-07	0.28271	0.526	0.3	0.0157068
ATP6V0D2	1.60863e-11	0.282461	0.293	0.076	4.18068e-07
MDH1	4.82504e-07	0.281675	0.88	0.75	0.0125398
SQOR	3.89519e-06	0.281189	0.827	0.643	0.101232
IGF2R	1.24101e-07	0.28068	0.602	0.335	0.00322527
ANXA11	5.90212e-05	0.279513	0.827	0.667	1
ADGRE5	0.000772205	0.279062	0.624	0.493	1
ALAS1	5.85782e-08	0.277759	0.617	0.354	0.00152239
CD164	1.16511e-07	0.277177	0.977	0.867	0.00302799
SIRPB1	6.46984e-06	0.273993	0.526	0.317	0.168145
MRAS	3.38271e-08	0.27239	0.436	0.211	0.000879133
SLC31A2	2.93893e-07	0.271833	0.797	0.561	0.007638
GLRX	0.0339312	0.270581	0.805	0.804	1
ZNF706	1.25436e-06	0.270576	0.865	0.702	0.0325996
ENPP4	6.78029e-07	0.268217	0.459	0.257	0.0176213
SLC44A2	1.87532e-15	0.26821	0.361	0.087	4.87376e-11
CTSB	3.5947e-13	0.267925	0.992	0.991	9.34226e-09
MIR3945HG	1.42346e-12	0.267428	0.218	0.035	3.69943e-08
MGLL	6.40805e-10	0.267176	0.451	0.183	1.66539e-05
SMPDL3A	1.87821e-07	0.267166	0.376	0.167	0.00488128
SEPHS2	0.000420244	0.266752	0.564	0.391	1
RTN3	6.29389e-07	0.266741	0.917	0.711	0.0163572
ATP6AP1	3.76227e-06	0.264857	0.902	0.798	0.0977776
HSD17B4	5.76432e-06	0.261489	0.692	0.515	0.149809
CEBPB	9.59813e-05	0.261054	0.932	0.807	1
TIMM8B	2.63723e-05	0.260621	0.669	0.463	0.68539
ATP6V0D1	0.000118371	0.260221	0.827	0.683	1
TSPAN4	1.79938e-06	0.259585	0.647	0.396	0.0467641
FAIM	2.9573e-05	0.258998	0.203	0.078	0.768573
ANXA4	2.27015e-05	0.258513	0.699	0.507	0.589989
IL2RG	4.68945e-05	0.25803	0.594	0.389	1
ALDH2	0.423674	0.257382	0.737	0.765	1
ARHGAP10	2.90198e-06	0.257198	0.526	0.3	0.0754195
UGCG	0.000587509	0.256552	0.504	0.357	1
RAC2	0.000140711	0.25637	0.759	0.565	1
TMEM30A	1.471e-05	0.255572	0.752	0.561	0.382297
NDUFB6	1.66102e-05	0.254389	0.767	0.58	0.431682
MT-CYB	0.0032869	0.253758	1	1	1
CSF1	7.38795e-09	0.251632	0.271	0.083	0.000192006
UQCRB	1.75148e-06	0.251599	0.955	0.837	0.0455193
SCPEP1	1.99707e-05	0.251325	0.925	0.798	0.519019
AC015912.3	1.10846e-08	0.250959	0.248	0.072	0.000288079
SERPINA1	0.0595335	0.25092	0.925	0.935	1
MT-ND1	0.000196595	0.250401	1	0.998	1
S100A4	5.39349e-05	-0.250033	0.827	0.946	1
HMGB2	0.0093869	-0.250149	0.602	0.652	1
GIT2	0.000338963	-0.251568	0.414	0.533	1
GNAQ	0.000646255	-0.251705	0.444	0.552	1
THBD	0.0876606	-0.251746	0.256	0.313	1
BCL2	0.000144155	-0.251954	0.15	0.304	1
HNRNPA3	6.34527e-05	-0.252645	0.82	0.833	1
FOXN3	0.00173803	-0.253147	0.398	0.498	1
NFKBIA	0.0654721	-0.253415	0.955	0.974	1
TET2	0.00449676	-0.25429	0.414	0.485	1
PRDM1	0.130029	-0.254982	0.278	0.322	1
ELF1	8.00488e-05	-0.255356	0.752	0.791	1
PSMB9	0.00119868	-0.255358	0.692	0.704	1
SWAP70	0.00014494	-0.255983	0.541	0.646	1
PIK3C2A	0.000248482	-0.256197	0.271	0.404	1
GIMAP8	8.76113e-05	-0.256818	0.165	0.328	1
SP100	0.00062225	-0.256854	0.744	0.757	1
IFI35	0.00165375	-0.257274	0.368	0.47	1
ELMO1	1.27987e-05	-0.257634	0.173	0.357	0.332626
NAGK	0.000292591	-0.257668	0.632	0.698	1
KMT2E	0.00294315	-0.257692	0.692	0.711	1
MYCBP2	0.000495777	-0.257958	0.466	0.578	1
KBTBD8	0.000219746	-0.25812	0.113	0.25	1
TNRC6B	5.22863e-05	-0.258168	0.248	0.417	1
ARHGAP15	4.8105e-05	-0.258204	0.301	0.461	1
ABI3	0.000446894	-0.258372	0.361	0.496	1
OLFML2B	2.00526e-05	-0.258649	0.105	0.274	0.521147
C1QA	2.71948e-07	-0.258771	0.789	0.93	0.00706764
NME3	0.00272804	-0.263563	0.414	0.487	1
AP1S2	0.00384558	-0.263909	0.677	0.698	1
FAM129A	0.00110156	-0.264071	0.429	0.526	1
CAMK1D	0.00119337	-0.265189	0.368	0.461	1
SUCNR1	0.00455183	-0.265291	0.188	0.287	1
HOOK3	0.00189337	-0.265385	0.541	0.589	1
SNX6	0.00102078	-0.265408	0.752	0.752	1
WIPF1	2.18649e-05	-0.265741	0.729	0.783	0.568247
APPL1	0.000563658	-0.267031	0.489	0.576	1
WAPL	0.00126605	-0.268623	0.556	0.633	1
RAC1	3.56453e-05	-0.269254	0.91	0.926	0.926386
PLCB2	0.00177882	-0.269686	0.331	0.428	1
METTL7A	6.69036e-05	-0.269812	0.534	0.624	1
FPR1	1.99646e-05	-0.271293	0.586	0.707	0.518859
P2RY14	4.8724e-06	-0.273018	0.03	0.189	0.126629
MCL1	0.000175287	-0.273843	0.812	0.839	1
HNRNPD	1.82296e-05	-0.273916	0.782	0.854	0.47377
PLA2G16	0.0020939	-0.275453	0.316	0.426	1
NFKBIZ	0.522944	-0.276045	0.436	0.43	1
CLEC7A	7.0475e-06	-0.27657	0.722	0.83	0.183158
TUBA1A	0.0346203	-0.276839	0.699	0.702	1
GPR65	0.00641447	-0.277625	0.436	0.509	1
AP1B1	2.57052e-05	-0.277983	0.353	0.513	0.668052
JAK2	0.000478239	-0.278007	0.338	0.457	1
CXCR4	0.0352266	-0.27807	0.684	0.717	1
NUCKS1	4.342e-05	-0.278571	0.857	0.88	1
CTTNBP2NL	2.80454e-05	-0.279343	0.331	0.487	0.728872
RAB31	1.24025e-05	-0.279755	0.88	0.863	0.322328
TRIB1	0.213415	-0.279764	0.481	0.485	1
JAML	0.00350271	-0.2798	0.579	0.665	1
LRRC8C	2.87348e-05	-0.279839	0.248	0.415	0.746788
SUSD3	1.64266e-06	-0.280581	0.083	0.28	0.042691
HLA-DMB	2.9977e-08	-0.28072	0.887	0.967	0.000779071
LMO2	0.000265039	-0.281179	0.293	0.426	1
SPECC1	0.000115684	-0.281938	0.203	0.357	1
ANKRD22	1.08261e-05	-0.282254	0.135	0.324	0.28136
SESN1	0.00542957	-0.282791	0.346	0.433	1
ENTPD1	2.92289e-06	-0.283718	0.195	0.404	0.075963
PIK3R1	0.000718651	-0.285411	0.496	0.574	1
GIMAP6	7.59871e-07	-0.285722	0.113	0.313	0.0197483
BTG1	0.000385226	-0.286325	0.887	0.915	1
ARHGAP4	6.91634e-06	-0.287454	0.241	0.422	0.179749
OFD1	0.0034985	-0.287573	0.188	0.28	1
APBB1IP	1.52303e-05	-0.288659	0.692	0.776	0.39582
CPED1	6.50629e-05	-0.288693	0.211	0.363	1
FAM105A	1.12538e-05	-0.289368	0.406	0.583	0.292475
PPIB	1.54507e-05	-0.289591	0.94	0.933	0.401548
SAMD9	0.00121677	-0.29128	0.391	0.491	1
PMP22	0.0709235	-0.294073	0.526	0.533	1
FUCA1	0.422613	-0.295143	0.639	0.53	1
CAPZB	2.84462e-08	-0.29515	0.932	0.941	0.000739289
DOCK4	7.83099e-08	-0.295493	0.226	0.467	0.0020352
LGMN	0.150275	-0.296262	0.617	0.502	1
AC023157.3	0.00416532	-0.296608	0.075	0.17	1
NUDT16	0.000185296	-0.297152	0.376	0.511	1
NUDT3	2.37502e-05	-0.297983	0.271	0.433	0.617245
TYMP	3.79392e-05	-0.298089	0.812	0.837	0.986002
PLSCR1	8.26326e-06	-0.298685	0.684	0.802	0.214754
TGFBR1	0.00115015	-0.299216	0.466	0.572	1
NR4A1	0.0633699	-0.300213	0.391	0.439	1
NR4A2	0.0205976	-0.300299	0.203	0.302	1
CD4	6.09822e-07	-0.301367	0.639	0.763	0.0158487
JAZF1	0.000122402	-0.302943	0.293	0.42	1
HLA-DRB6	0.980906	-0.303469	0.368	0.307	1
QKI	6.33204e-05	-0.303785	0.571	0.641	1
GNAI2	2.55381e-09	-0.303918	0.962	0.963	6.6371e-05
OTUD1	0.627362	-0.304102	0.346	0.339	1
TNFSF10	0.00144943	-0.304519	0.361	0.485	1
TMEM176A	0.00852255	-0.305744	0.662	0.685	1
RARRES3	0.00421556	-0.30585	0.338	0.424	1
SLC8A1	1.39039e-05	-0.305941	0.414	0.587	0.361349
DNMT1	0.000107304	-0.306134	0.639	0.728	1
NASP	1.99095e-05	-0.306798	0.271	0.43	0.517427
CCND2	8.98318e-05	-0.307922	0.203	0.348	1
EIF2AK2	0.000308738	-0.30884	0.541	0.622	1
CD1C	0.00108964	-0.308883	0.083	0.198	1
KLF6	0.177857	-0.310715	0.94	0.939	1
SRSF3	9.25302e-05	-0.310926	0.729	0.817	1
AOAH	7.02678e-05	-0.31191	0.248	0.413	1
GAS6	7.98855e-07	-0.311947	0.195	0.407	0.0207615
IL18	1.21099e-06	-0.31199	0.624	0.774	0.0314725
GPRIN3	2.56606e-06	-0.312243	0.662	0.763	0.0666893
DOCK10	4.86406e-05	-0.312414	0.496	0.607	1
PLEK2	0.000111652	-0.312593	0.113	0.263	1
LPAR5	2.44026e-09	-0.313019	0.053	0.298	6.342e-05
RGS19	1.22197e-05	-0.313097	0.511	0.624	0.317577
FYB1	1.01624e-07	-0.313785	0.767	0.909	0.0026411
GBP2	0.000459435	-0.31505	0.293	0.422	1
UBC	8.36582e-05	-0.317019	1	0.987	1
TNFAIP3	0.182577	-0.317427	0.586	0.626	1
KLF10	0.0167783	-0.318479	0.353	0.441	1
MBNL1	7.72492e-07	-0.319204	0.812	0.88	0.0200763
POU2F2	2.06122e-06	-0.320256	0.128	0.326	0.0535691
ARL6IP5	7.76899e-09	-0.320873	0.91	0.93	0.000201908
VPS13C	4.65352e-06	-0.321798	0.684	0.776	0.12094
TBXAS1	1.66885e-05	-0.322171	0.549	0.678	0.433717
A2M	1.31208e-05	-0.32228	0.812	0.867	0.340997
TLR1	3.4763e-08	-0.322566	0.286	0.535	0.000903457
TWISTNB	0.603483	-0.322785	0.444	0.367	1
VASH1	4.75563e-07	-0.32336	0.173	0.38	0.0123594
ACTB	1.28512e-08	-0.323575	0.992	1	0.000333989
DCK	9.81941e-08	-0.3236	0.218	0.437	0.00255197
P3H2	1.2661e-07	-0.323768	0.038	0.237	0.00329047
CD83	0.126924	-0.323859	0.729	0.554	1
SESN3	3.68966e-06	-0.324474	0.165	0.35	0.0958905
TRPS1	3.42602e-08	-0.325491	0.113	0.343	0.000890388
PRPF38B	0.000117999	-0.327095	0.602	0.683	1
PRMT2	6.712e-06	-0.327245	0.504	0.641	0.174438
RAB32	7.00715e-06	-0.327277	0.714	0.77	0.182109
SVBP	1.67889e-05	-0.330006	0.301	0.47	0.436327
TMIGD3	4.53097e-06	-0.331149	0.075	0.252	0.117755
RTN1	2.47004e-07	-0.332703	0.158	0.38	0.00641938
ID2	0.00505964	-0.332726	0.865	0.878	1
IFIT1	0.00025974	-0.333548	0.233	0.404	1
ATRX	1.73101e-06	-0.334169	0.526	0.683	0.0449871
IFIT3	0.0319274	-0.334494	0.466	0.513	1
SPRED1	1.46449e-05	-0.335643	0.451	0.613	0.380607
ADAM28	2.41487e-06	-0.336734	0.218	0.411	0.06276
TNFSF13B	8.16843e-06	-0.337276	0.564	0.715	0.212289
RHOG	5.97138e-07	-0.338174	0.789	0.841	0.015519
OSM	4.40012e-05	-0.340361	0.023	0.152	1
B3GNT5	0.0002573	-0.341671	0.541	0.63	1
LPCAT2	1.20806e-05	-0.342433	0.662	0.763	0.313962
ARHGAP9	1.97808e-07	-0.342604	0.203	0.411	0.00514083
FPR3	2.00067e-05	-0.342636	0.617	0.722	0.519953
ETV5	8.85387e-09	-0.343338	0.098	0.343	0.000230103
MX2	4.26922e-05	-0.343652	0.286	0.45	1
JMJD1C	0.00028733	-0.345239	0.654	0.711	1
BST2	1.30669e-05	-0.345458	0.767	0.787	0.339594
CD14	0.00497317	-0.345565	0.887	0.904	1
TAGAP	3.39593e-05	-0.345649	0.286	0.452	0.882567
DDX5	3.19898e-09	-0.347654	0.992	0.998	8.31383e-05
CPVL	1.32467e-07	-0.348871	0.827	0.902	0.00344269
PARP9	1.6163e-06	-0.349358	0.466	0.602	0.0420059
SRGN	1.96195e-09	-0.349515	0.977	0.991	5.0989e-05
SLC4A7	4.50415e-06	-0.350058	0.195	0.378	0.117058
BMP2K	1.3499e-05	-0.350803	0.519	0.65	0.350826
HSPA6	0.332229	-0.353396	0.263	0.296	1
SLCO2B1	4.04433e-06	-0.354164	0.564	0.702	0.105108
LPGAT1	7.07375e-06	-0.354993	0.263	0.43	0.18384
CIITA	2.38178e-07	-0.355159	0.241	0.454	0.00619
FCN1	0.0695784	-0.358132	0.323	0.217	1
MPEG1	1.69247e-06	-0.359442	0.436	0.617	0.0439857
HACD4	7.86488e-07	-0.3597	0.383	0.609	0.02044
TCF4	2.7053e-08	-0.360708	0.256	0.489	0.000703082
COTL1	1.45805e-06	-0.364537	0.872	0.915	0.0378932
PICALM	2.46209e-08	-0.364837	0.805	0.883	0.000639873
PYCARD	2.6571e-07	-0.364961	0.692	0.839	0.00690553
SPINT2	1.44063e-08	-0.365061	0.722	0.817	0.000374405
FCGR3A	1.53709e-07	-0.365078	0.594	0.848	0.00399475
TM6SF1	7.8942e-07	-0.365955	0.444	0.617	0.0205162
SRSF7	0.00906307	-0.36721	0.872	0.846	1
LAT2	8.03244e-07	-0.367602	0.436	0.611	0.0208755
LY86	4.44847e-07	-0.368159	0.699	0.824	0.0115611
PARP14	8.11911e-06	-0.370338	0.624	0.711	0.211008
HSP90AB1	0.00194733	-0.373234	0.992	0.991	1
PEA15	1.47798e-06	-0.375147	0.722	0.783	0.0384112
NCF4	6.56575e-09	-0.375332	0.414	0.63	0.000170637
CD163	8.9613e-06	-0.377947	0.722	0.837	0.232895
CD302	1.22143e-07	-0.378973	0.489	0.687	0.00317436
SERPINB9	1.30147e-07	-0.379164	0.15	0.372	0.00338238
P2RY12	8.06705e-11	-0.379966	0.038	0.311	2.09655e-06
AXL	9.40886e-10	-0.382313	0.188	0.457	2.44527e-05
RNF213	3.32e-05	-0.384391	0.669	0.713	0.862834
EPB41L2	3.7594e-07	-0.385124	0.308	0.517	0.00977031
RNASET2	6.17175e-13	-0.385607	0.797	0.926	1.60398e-08
TMEM176B	0.000763412	-0.386174	0.752	0.778	1
FCGR2C	2.0054e-07	-0.386385	0.18	0.4	0.00521182
NLRP3	1.88072e-07	-0.388292	0.173	0.391	0.00488781
RGS18	7.05922e-09	-0.388459	0.128	0.376	0.000183462
FAM49B	1.26205e-09	-0.388682	0.744	0.839	3.27994e-05
IFIT2	0.00607851	-0.389471	0.361	0.485	1
PPA1	2.8147e-05	-0.390323	0.414	0.557	0.731513
GBP1	0.00754521	-0.390325	0.429	0.526	1
ST6GAL1	3.20316e-09	-0.39439	0.263	0.517	8.32469e-05
BLNK	5.17179e-07	-0.394475	0.278	0.472	0.013441
MAF	2.99651e-05	-0.395233	0.338	0.483	0.778762
GAL3ST4	1.65482e-08	-0.396901	0.075	0.32	0.000430071
GLIPR1	2.60281e-08	-0.397082	0.722	0.872	0.000676444
CCL17	0.455243	-0.398513	0.165	0.187	1
XIST	1.63166e-06	-0.399687	0.541	0.711	0.0424051
ZFAND2A	0.824598	-0.400035	0.323	0.289	1
PCED1B-AS1	8.84038e-08	-0.40098	0.331	0.528	0.00229753
FRMD4B	7.39788e-08	-0.401832	0.391	0.587	0.00192263
SH3KBP1	2.20391e-09	-0.404017	0.383	0.635	5.72773e-05
GGTA1P	3.17648e-08	-0.404191	0.406	0.637	0.000825536
KIAA1551	3.01969e-08	-0.40443	0.474	0.643	0.000784787
IFI16	6.14332e-11	-0.405695	0.797	0.893	1.59659e-06
OAS2	8.77994e-06	-0.406447	0.421	0.55	0.228182
IFI27	0.323279	-0.411251	0.368	0.383	1
DDIT4	8.15486e-05	-0.422076	0.398	0.515	1
ALOX5AP	9.31523e-07	-0.423627	0.744	0.907	0.0242094
HLA-DMA	8.53821e-15	-0.423746	0.97	0.987	2.219e-10
TLR2	2.24846e-09	-0.423896	0.481	0.685	5.84351e-05
PLAU	1.9319e-05	-0.424504	0.571	0.663	0.502081
FKBP5	3.26637e-09	-0.425975	0.571	0.754	8.48898e-05
BAZ2B	5.07633e-07	-0.42925	0.489	0.637	0.0131929
GBP4	2.29501e-05	-0.42993	0.293	0.446	0.596451
MAFB	8.07518e-07	-0.430231	0.85	0.885	0.0209866
SKIL	1.88979e-08	-0.434341	0.526	0.696	0.000491136
SAMSN1	1.58987e-07	-0.434673	0.331	0.541	0.00413191
EMB	4.04373e-10	-0.434843	0.248	0.533	1.05092e-05
P2RY6	1.98079e-11	-0.435767	0.105	0.396	5.14788e-07
ACTR2	3.66802e-15	-0.438519	0.902	0.954	9.53282e-11
SAMD9L	1.98846e-08	-0.439191	0.496	0.704	0.000516781
CTSC	2.28864e-07	-0.439967	0.955	0.939	0.00594795
CD69	0.00103025	-0.440532	0.331	0.443	1
STK38L	5.31553e-10	-0.441911	0.211	0.465	1.38145e-05
S100B	0.00980013	-0.442265	0.128	0.215	1
STAT1	2.68758e-06	-0.44258	0.662	0.722	0.0698475
JUN	0.00843525	-0.442617	0.985	0.989	1
DSE	3.69488e-09	-0.444655	0.489	0.674	9.60262e-05
ARHGDIB	2.01244e-13	-0.447806	0.925	0.961	5.23014e-09
INPP5D	2.32593e-11	-0.44847	0.256	0.546	6.04487e-07
HSP90AA1	0.13888	-0.449852	1	0.989	1
2022-03-01	8.88733e-12	-0.455451	0.556	0.798	2.30973e-07
ISG15	0.00157767	-0.457945	0.586	0.652	1
STMN1	6.91728e-08	-0.459581	0.308	0.539	0.00179773
NDRG2	8.74714e-12	-0.462602	0.09	0.391	2.2733e-07
HCLS1	8.28466e-12	-0.465669	0.707	0.835	2.1531e-07
HIF1A	3.76479e-09	-0.471362	0.624	0.77	9.78431e-05
CXorf21	5.2038e-08	-0.472303	0.195	0.424	0.00135241
HTRA1	1.68163e-06	-0.473829	0.098	0.296	0.043704
PTGS1	1.76065e-11	-0.473922	0.263	0.537	4.57576e-07
SAP30	8.9826e-10	-0.474964	0.143	0.407	2.33449e-05
CSF2RA	6.31757e-12	-0.477013	0.414	0.663	1.64187e-07
BAG3	0.589745	-0.480544	0.271	0.274	1
MX1	2.033e-06	-0.481686	0.541	0.67	0.0528357
JUNB	7.52376e-07	-0.482365	0.895	0.93	0.0195535
PNRC1	6.23125e-12	-0.48714	0.842	0.922	1.61944e-07
IER5	0.0134718	-0.4876	0.602	0.639	1
CCR2	2.63361e-08	-0.488782	0.113	0.341	0.000684448
ADAP2	2.00418e-11	-0.490921	0.474	0.709	5.20867e-07
ETS2	1.1861e-11	-0.494653	0.617	0.841	3.08255e-07
IFI44	6.39827e-11	-0.499811	0.406	0.637	1.66285e-06
STK17B	2.8773e-10	-0.50144	0.331	0.585	7.47782e-06
PTPRC	7.21497e-16	-0.502912	0.865	0.952	1.8751e-11
LST1	2.23951e-12	-0.503428	0.737	0.883	5.82027e-08
USP53	6.41644e-08	-0.504986	0.143	0.37	0.00166757
ITPR2	1.15404e-10	-0.507312	0.421	0.654	2.99924e-06
KCTD12	4.2551e-16	-0.508891	0.812	0.933	1.10586e-11
BTG2	1.44959e-06	-0.518463	0.519	0.646	0.0376734
ZFP36L1	2.70597e-11	-0.519799	0.744	0.891	7.03255e-07
TLR7	5.32934e-11	-0.525263	0.218	0.498	1.38504e-06
FOS	1.41647e-08	-0.52652	0.977	0.983	0.000368126
SORL1	3.38722e-08	-0.526922	0.451	0.604	0.000880304
MGAT4A	8.42932e-13	-0.527081	0.489	0.73	2.1907e-08
SGK1	0.00742749	-0.528862	0.925	0.896	1
ENPP2	6.56713e-13	-0.529619	0.098	0.426	1.70673e-08
LTC4S	1.26836e-14	-0.532802	0.06	0.424	3.29635e-10
FILIP1L	1.92198e-10	-0.538215	0.203	0.487	4.99503e-06
CKLF	7.26117e-08	-0.542155	0.617	0.7	0.00188711
IFNGR1	3.05872e-14	-0.545289	0.91	0.948	7.94931e-10
CD86	9.46059e-17	-0.545427	0.707	0.876	2.45871e-12
OLFML3	3.51765e-13	-0.545724	0.03	0.354	9.14202e-09
PTGS2	0.00186557	-0.548298	0.105	0.215	1
SERPINF1	9.47757e-14	-0.551537	0.233	0.578	2.46313e-09
VSIR	1.39682e-09	-0.552621	0.489	0.685	3.63019e-05
ITM2B	1.05641e-19	-0.552722	1	0.996	2.74552e-15
IL13RA1	5.21767e-14	-0.553732	0.707	0.837	1.35602e-09
HSPA1A	0.184776	-0.556952	0.955	0.924	1
PPP1R15A	0.129417	-0.559018	0.767	0.693	1
TRA2B	0.000140517	-0.562755	0.632	0.737	1
RASSF4	1.1813e-17	-0.565127	0.586	0.809	3.07008e-13
ADORA3	7.62201e-14	-0.565372	0.083	0.422	1.98088e-09
RB1	1.20728e-13	-0.565776	0.481	0.691	3.13759e-09
DNAJB1	0.311724	-0.566946	0.82	0.809	1
GIMAP7	1.11417e-11	-0.567657	0.211	0.513	2.89561e-07
EPSTI1	7.01926e-13	-0.580432	0.383	0.683	1.82423e-08
ITGA4	2.50809e-14	-0.581967	0.241	0.583	6.51829e-10
HPGDS	3.93554e-13	-0.589269	0.09	0.435	1.02281e-08
FCER1A	0.000121909	-0.594083	0.053	0.183	1
GAPT	2.23392e-14	-0.594606	0.135	0.491	5.80574e-10
ZFP36L2	5.39918e-15	-0.597073	0.842	0.935	1.40319e-10
HMOX1	0.789617	-0.597304	0.767	0.702	1
CORO1A	1.66778e-16	-0.612589	0.233	0.596	4.3344e-12
PAK1	4.38322e-17	-0.61421	0.391	0.711	1.13915e-12
HLA-DOA	9.2137e-17	-0.618445	0.414	0.752	2.39455e-12
CLEC5A	1.2075e-08	-0.620488	0.376	0.583	0.000313818
GIMAP4	5.59791e-14	-0.625111	0.496	0.759	1.45484e-09
MEF2A	5.67464e-17	-0.628724	0.549	0.804	1.47478e-12
CEBPD	1.06297e-10	-0.630945	0.812	0.893	2.76256e-06
HSPH1	0.248822	-0.64989	0.722	0.713	1
PKIB	5.44707e-15	-0.668297	0.098	0.459	1.41564e-10
C3AR1	1.89891e-18	-0.671196	0.511	0.841	4.93509e-14
C1orf162	1.73379e-18	-0.674053	0.767	0.933	4.50595e-14
RGS10	8.79842e-22	-0.675884	0.774	0.92	2.28662e-17
EGR2	0.0030127	-0.679862	0.406	0.478	1
FCGR2A	8.23736e-20	-0.683502	0.782	0.939	2.14081e-15
XAF1	5.52143e-13	-0.6839	0.511	0.748	1.43496e-08
AIF1	6.90286e-24	-0.686791	0.895	0.989	1.79398e-19
MNDA	2.50151e-19	-0.68783	0.744	0.95	6.50119e-15
ZFP36	1.81445e-12	-0.69877	0.88	0.95	4.71558e-08
CD93	3.0423e-16	-0.704526	0.15	0.53	7.90665e-12
STAB1	7.41932e-17	-0.707908	0.09	0.485	1.92821e-12
HERPUD1	6.74056e-13	-0.708179	0.767	0.872	1.7518e-08
CLEC10A	1.81532e-12	-0.710034	0.165	0.474	4.71783e-08
IFI44L	1.47903e-13	-0.720289	0.271	0.602	3.84386e-09
CCL3	0.111923	-0.729908	0.752	0.726	1
IFITM2	1.02397e-15	-0.734177	0.602	0.843	2.66119e-11
CSF1R	2.22075e-23	-0.736101	0.654	0.874	5.77151e-19
IL1B	0.002728	-0.761248	0.391	0.496	1
IFITM3	1.32748e-16	-0.763902	0.902	0.95	3.44998e-12
CST3	2.12469e-25	-0.770002	1	1	5.52185e-21
FOLR2	5.87108e-07	-0.77347	0.241	0.443	0.0152583
FCGBP	8.08951e-08	-0.774314	0.09	0.309	0.00210238
HLA-DQB1	1.23456e-33	-0.775368	0.985	0.998	3.2085e-29
PDK4	3.64941e-09	-0.777885	0.421	0.648	9.48445e-05
OGFRL1	1.65587e-17	-0.784603	0.579	0.802	4.30343e-13
HSPA1B	0.154556	-0.788724	0.782	0.752	1
TGFBI	1.6546e-24	-0.803666	0.767	0.965	4.30014e-20
IER3	4.12853e-09	-0.807294	0.579	0.785	0.000107296
GPR34	2.41672e-15	-0.821391	0.459	0.726	6.28082e-11
C1QC	3.97881e-19	-0.839125	0.699	0.93	1.03405e-14
EGR1	6.70084e-06	-0.842502	0.729	0.774	0.174148
MARCKS	9.89803e-27	-0.862719	0.632	0.924	2.5724e-22
HLA-DRB1	2.28982e-40	-0.870018	1	1	5.95101e-36
CD74	4.95873e-45	-0.88242	1	1	1.28873e-40
NAPSB	6.35548e-19	-0.905707	0.256	0.659	1.65173e-14
TNF	0.00301945	-0.912611	0.271	0.376	1
PLD4	5.09077e-20	-0.916261	0.098	0.533	1.32304e-15
RNASE6	6.18881e-25	-0.92372	0.338	0.757	1.60841e-20
MEF2C	4.48455e-28	-0.940369	0.293	0.767	1.16549e-23
HLA-DRA	2.4522e-42	-0.945118	1	1	6.37302e-38
SLC40A1	6.37732e-07	-0.981947	0.233	0.43	0.016574
IER2	5.90666e-11	-0.986988	0.692	0.824	1.53508e-06
HLA-DRB5	3.67602e-13	-1.01081	0.662	0.724	9.55362e-09
CX3CR1	1.50516e-20	-1.01887	0.038	0.487	3.91176e-16
CCL13	0.00014896	-1.0239	0.128	0.274	1
CXCL8	0.600596	-1.03963	0.594	0.524	1
YWHAH	1.44728e-24	-1.05624	0.669	0.885	3.76133e-20
FGL2	9.18947e-30	-1.05842	0.639	0.909	2.38825e-25
P2RY13	2.06518e-17	-1.09292	0.346	0.715	5.3672e-13
HLA-DPA1	1.09744e-41	-1.09687	1	1	2.85213e-37
HLA-DQA1	3.85324e-30	-1.09769	0.955	0.996	1.00142e-25
CLDN1	1.76041e-15	-1.1468	0.143	0.504	4.57514e-11
SELENOP	0.0473465	-1.16893	0.233	0.289	1
RGS2	3.57284e-15	-1.18772	0.579	0.793	9.28546e-11
HLA-DPB1	5.54286e-46	-1.18918	0.962	1	1.44053e-41
LPAR6	2.65986e-38	-1.19093	0.466	0.902	6.9127e-34
GPR183	4.02494e-20	-1.20393	0.526	0.807	1.04604e-15
CCL2	2.20334e-08	-1.26645	0.203	0.459	0.000572625
MS4A6A	1.33794e-39	-1.30027	0.549	0.967	3.47717e-35
CCL4	2.14163e-05	-1.35433	0.594	0.709	0.556587
C3	6.30817e-28	-1.48849	0.233	0.715	1.63943e-23
CCL4L2	0.00242063	-1.51262	0.519	0.583	1
CXCL10	0.00976915	-1.5939	0.06	0.143	1
F13A1	2.31129e-36	-1.65516	0.12	0.739	6.00682e-32
CCL3L1	6.17128e-08	-1.82655	0.406	0.593	0.00160386
RGS1	5.47955e-33	-1.85147	0.669	0.928	1.42408e-28

## Sheet: P21120201.clusterMacrophages3_d
gene_id	p_val	avg_logFC	pct.1	pct.2	p_val_adj
CCL18	2.48737e-19	2.24862	0.667	0.258	6.46443e-15
HMOX1	3.84974e-19	1.80643	0.956	0.674	1.00051e-14
LGMN	7.2439e-36	1.7209	0.967	0.449	1.88262e-31
CTSL	5.38237e-37	1.60958	0.989	0.652	1.39883e-32
CCL13	3.60075e-25	1.51012	0.644	0.169	9.35799e-21
IFI27	1.34246e-13	1.39123	0.678	0.326	3.48893e-09
GPNMB	4.77355e-35	1.37129	1	0.65	1.2406e-30
PLA2G7	1.39058e-38	1.35134	0.9	0.318	3.61398e-34
CTSD	7.44742e-34	1.23845	1	0.885	1.93551e-29
FUCA1	8.51766e-15	1.22219	0.822	0.507	2.21366e-10
CCL2	7.51873e-06	1.17285	0.611	0.364	0.195404
SPP1	0.000460973	1.12388	0.667	0.481	1
CREG1	1.15916e-35	1.11493	1	0.777	3.01253e-31
SLC40A1	6.46286e-07	1.08018	0.589	0.35	0.0167963
FTL	7.48813e-35	1.07372	1	1	1.94609e-30
CTSZ	2.23821e-29	1.06981	0.989	0.926	5.81688e-25
NPL	1.08778e-32	1.05669	0.922	0.404	2.82702e-28
CTSB	1.56778e-33	1.05554	1	0.99	4.0745e-29
GLUL	3.60328e-33	1.0368	1	0.926	9.36456e-29
PLD3	1.37119e-17	0.977017	0.911	0.7	3.5636e-13
TXN	1.99869e-25	0.967803	0.989	0.785	5.19439e-21
ACP5	1.06515e-16	0.928514	0.889	0.567	2.76821e-12
PSAP	1.77713e-28	0.928345	1	1	4.61858e-24
EPHX1	5.88968e-20	0.92831	0.7	0.274	1.53067e-15
IFI6	2.93878e-20	0.922341	0.989	0.823	7.6376e-16
ISG15	6.85972e-14	0.913131	0.911	0.588	1.78277e-09
IFIT1	1.43248e-14	0.81257	0.722	0.302	3.72287e-10
APOE	1.58415e-13	0.811912	0.989	0.744	4.11705e-09
FOLR2	6.86953e-11	0.806374	0.667	0.35	1.78532e-06
LGALS3	2.68475e-20	0.794737	1	0.833	6.97739e-16
CCL8	1.54644e-06	0.791082	0.222	0.066	0.0401904
SQSTM1	6.55155e-17	0.789002	0.989	0.797	1.70268e-12
RAB42	8.1947e-32	0.783483	0.667	0.143	2.12972e-27
CD163	5.93302e-16	0.781389	0.956	0.785	1.54193e-11
IFIT3	3.53142e-17	0.780801	0.867	0.437	9.1778e-13
TCN2	3.99942e-20	0.77936	0.622	0.211	1.03941e-15
NUPR1	1.78672e-17	0.768746	0.844	0.38	4.64351e-13
IDH1	1.0725e-17	0.764006	0.856	0.495	2.78733e-13
CTSA	1.35441e-25	0.75666	0.967	0.734	3.51996e-21
GM2A	2.59142e-21	0.74578	0.922	0.59	6.73485e-17
SDS	4.52869e-14	0.72916	0.611	0.229	1.17696e-09
PMP22	2.52567e-17	0.707331	0.856	0.473	6.56397e-13
GLMP	4.48008e-29	0.691522	0.956	0.39	1.16433e-24
MS4A4A	6.30654e-11	0.691202	0.833	0.602	1.63901e-06
ASAH1	4.25127e-23	0.67655	0.989	0.865	1.10486e-18
BLVRB	2.05017e-18	0.668326	0.9	0.573	5.32818e-14
SELENOP	1.58197e-07	0.658895	0.5	0.237	0.00411139
SOAT1	9.97367e-18	0.653802	0.967	0.65	2.59206e-13
RSAD2	1.54826e-14	0.645998	0.567	0.185	4.02378e-10
CD59	5.64675e-19	0.632129	0.9	0.499	1.46753e-14
CD68	1.04916e-23	0.63084	0.967	0.592	2.72667e-19
TSPAN4	6.15812e-23	0.627698	0.867	0.378	1.60043e-18
ADM	2.95653e-12	0.616606	0.633	0.252	7.68373e-08
LAMP1	2.38846e-19	0.611779	0.967	0.634	6.20738e-15
TGM2	1.66679e-16	0.609482	0.511	0.137	4.33181e-12
LIPA	1.70447e-16	0.608358	0.978	0.69	4.42974e-12
TIMP2	1.70895e-18	0.605173	0.956	0.571	4.44138e-14
SLC48A1	1.17237e-29	0.602696	0.6	0.115	3.04688e-25
TXNRD1	2.57825e-13	0.600347	0.844	0.481	6.7006e-09
ADAMDEC1	5.15159e-09	0.592641	0.344	0.111	0.000133885
NPC1	4.21165e-24	0.59241	0.711	0.213	1.09456e-19
PRDX1	1.06625e-18	0.58604	1	0.95	2.77109e-14
LHFPL2	2.0704e-12	0.584825	0.911	0.584	5.38076e-08
CYP27A1	1.74125e-16	0.583287	0.844	0.346	4.52533e-12
TTYH3	9.554e-18	0.581836	0.789	0.336	2.48299e-13
RNASE1	0.00329	0.577515	0.267	0.141	1
RAP2B	4.12934e-19	0.575698	0.956	0.545	1.07317e-14
DAB2	1.66999e-15	0.571405	0.967	0.765	4.34012e-11
MPP1	2.35613e-15	0.571313	0.9	0.569	6.12335e-11
B3GNT2	3.32093e-24	0.566656	0.756	0.247	8.63077e-20
TDP2	3.83459e-13	0.561391	0.733	0.36	9.96571e-09
ABHD12	4.69113e-16	0.560647	0.911	0.533	1.21918e-11
CSTB	1.00846e-14	0.557248	1	0.93	2.6209e-10
MRC1	5.56348e-09	0.552849	0.933	0.702	0.000144589
ATOX1	4.88068e-16	0.551303	0.989	0.67	1.26844e-11
MX1	4.23403e-10	0.536879	0.878	0.598	1.10038e-05
COLEC12	1.18172e-16	0.531329	0.644	0.227	3.07118e-12
ALDH1A1	1.38825e-09	0.531226	0.589	0.29	3.60792e-05
CCR1	8.24908e-15	0.523189	0.856	0.493	2.14385e-10
MGLL	4.70341e-17	0.521829	0.589	0.181	1.22237e-12
BRI3	2.46717e-11	0.520968	0.989	0.853	6.41193e-07
ACE	5.60317e-25	0.518208	0.667	0.161	1.45621e-20
SIGLEC1	4.1917e-17	0.516284	0.811	0.342	1.08938e-12
CD63	1.84072e-20	0.514519	1	0.98	4.78385e-16
TPP1	5.67477e-15	0.510168	0.956	0.773	1.47482e-10
ABCA1	5.25401e-13	0.510059	0.756	0.39	1.36546e-08
GDF15	6.1122e-08	0.507546	0.389	0.147	0.0015885
APOC1	1.50246e-13	0.501502	0.989	0.732	3.90475e-09
SLC15A3	1.41198e-14	0.500818	0.889	0.495	3.6696e-10
FABP5	4.97258e-06	0.488947	0.756	0.531	0.129232
FTLP3	2.84824e-17	0.486648	0.789	0.358	7.40228e-13
GNPDA1	9.94347e-14	0.486026	0.867	0.521	2.58421e-09
POR	1.48122e-11	0.484504	0.733	0.36	3.84955e-07
HS3ST2	1.51059e-14	0.478558	0.278	0.044	3.92588e-10
CHIT1	0.000162305	0.477937	0.211	0.082	1
IQGAP2	1.72604e-11	0.476481	0.889	0.539	4.4858e-07
FNIP2	5.39704e-19	0.476385	0.722	0.262	1.40264e-14
GCLM	2.93562e-13	0.475805	0.456	0.133	7.6294e-09
CAPG	3.27296e-10	0.474613	1	0.936	8.50608e-06
C2	2.90674e-13	0.467664	0.544	0.187	7.55432e-09
CSF1	1.12316e-05	0.466914	0.267	0.099	0.291899
CTSC	1.66987e-11	0.464825	0.989	0.934	4.33981e-07
EMP1	2.50885e-11	0.46058	0.689	0.31	6.52024e-07
SDCBP	1.73153e-14	0.455428	1	0.889	4.50007e-10
TBC1D2	4.57819e-16	0.45385	0.722	0.276	1.18983e-11
VAT1	7.44777e-12	0.452525	0.8	0.449	1.9356e-07
PLAU	2.08246e-08	0.448616	0.878	0.6	0.00054121
PLBD2	4.3111e-15	0.446963	0.689	0.28	1.12041e-10
CMKLR1	1.53445e-13	0.446343	0.622	0.249	3.98787e-09
SMIM25	4.60493e-16	0.435804	0.856	0.336	1.19678e-11
SDC3	2.23018e-14	0.434905	0.467	0.139	5.79602e-10
CALM3	1.62928e-08	0.433458	0.822	0.575	0.000423433
DCXR	1.6417e-06	0.433318	0.711	0.451	0.042666
TUBA1C	1.13552e-09	0.433104	0.911	0.636	2.95111e-05
ADAM9	2.92916e-10	0.430641	0.822	0.511	7.6126e-06
SLC7A8	5.23817e-17	0.427843	0.578	0.165	1.36135e-12
SLC38A6	1.3364e-19	0.426865	0.8	0.282	3.47316e-15
OAS2	1.22312e-12	0.425949	0.844	0.463	3.17876e-08
CYFIP1	2.60814e-09	0.424239	0.878	0.624	6.7783e-05
RBP1	6.48132e-13	0.424202	0.3	0.062	1.68443e-08
ARL4C	3.15055e-16	0.421862	0.578	0.167	8.18796e-12
ACOT13	1.53153e-15	0.42132	0.767	0.336	3.98029e-11
ATP6V1A	4.88563e-15	0.421027	0.944	0.577	1.26973e-10
PPDPF	4.01674e-08	0.417264	0.978	0.801	0.00104391
HERC5	7.09387e-10	0.416376	0.544	0.231	1.84363e-05
CFD	0.000460312	0.415003	0.6	0.441	1
KCNMA1	1.44144e-12	0.414395	0.556	0.201	3.74616e-08
ATP6V0D2	7.85404e-15	0.411944	0.378	0.08	2.04119e-10
LY6E	4.00925e-09	0.411699	0.933	0.742	0.000104196
GSTO1	7.66541e-11	0.410525	0.978	0.821	1.99216e-06
CPM	1.69942e-08	0.408621	0.844	0.555	0.000441661
RAB20	8.66409e-16	0.408376	0.744	0.31	2.25171e-11
MYO5A	3.3528e-08	0.408284	0.789	0.449	0.000871358
STAT1	1.32039e-08	0.408105	0.922	0.67	0.000343156
LRPAP1	5.17629e-10	0.405346	0.956	0.698	1.34527e-05
ID3	3.93718e-06	0.400588	0.744	0.481	0.102323
PLAUR	0.00198181	0.400138	0.811	0.64	1
NQO1	6.03532e-22	0.399627	0.444	0.074	1.56852e-17
IGF2R	1.91055e-13	0.398145	0.744	0.332	4.96533e-09
LILRB5	1.03057e-15	0.397059	0.4	0.087	2.67835e-11
IFIT2	7.66014e-06	0.396598	0.711	0.412	0.199079
C1QC	1.01002e-07	0.395303	0.989	0.859	0.00262495
LGALS1	2.78954e-07	0.394138	1	0.938	0.00724973
HEXB	2.20197e-13	0.3935	0.989	0.849	5.72269e-09
HEXA	2.79137e-13	0.393395	0.944	0.604	7.2545e-09
TALDO1	1.69898e-08	0.39335	0.956	0.793	0.000441549
CD84	1.50024e-05	0.384241	0.856	0.688	0.389897
RGL1	3.36916e-13	0.381217	0.589	0.221	8.7561e-09
UCP2	5.67988e-05	0.378895	0.933	0.75	1
PLTP	4.36337e-08	0.377478	0.667	0.332	0.001134
IFIH1	5.83412e-08	0.37141	0.689	0.398	0.00151623
HSP90B1	1.68524e-09	0.371229	1	0.944	4.37978e-05
SCARB2	1.40791e-11	0.369706	0.922	0.608	3.65901e-07
MMP14	4.02253e-08	0.369334	0.8	0.485	0.00104542
NOP10	4.30627e-07	0.368054	0.911	0.809	0.0111916
IVNS1ABP	1.46602e-10	0.367945	0.889	0.549	3.81004e-06
P4HB	1.46571e-09	0.367432	0.956	0.668	3.80924e-05
GNS	2.60402e-08	0.366062	0.889	0.678	0.000676759
BEX3	8.39098e-09	0.365701	0.656	0.352	0.000218073
SMPDL3A	1.85433e-14	0.365329	0.522	0.159	4.81922e-10
IL2RA	4.70143e-07	0.363387	0.322	0.119	0.0122186
SUCNR1	2.20527e-13	0.362328	0.589	0.207	5.73127e-09
IGSF6	2.97128e-07	0.360526	0.956	0.926	0.00772205
DPP4	3.4407e-16	0.360498	0.3	0.044	8.94204e-12
RRAGD	1.77945e-16	0.359538	0.689	0.247	4.62461e-12
TMEM138	8.86707e-11	0.359016	0.611	0.274	2.30446e-06
MGAT1	1.71229e-09	0.357982	0.978	0.746	4.45008e-05
FABP3	8.6966e-11	0.355737	0.4	0.127	2.26016e-06
ATP6V1B2	2.00058e-08	0.353772	0.944	0.7	0.000519931
IFITM3	2.00373e-05	0.353437	0.978	0.932	0.520749
PLPP3	5.65643e-11	0.352909	0.711	0.356	1.47005e-06
HEBP1	2.51352e-11	0.352201	0.789	0.408	6.53238e-07
SLC29A1	5.39223e-13	0.350113	0.744	0.338	1.40139e-08
MT-TE	1.2201e-08	0.349859	0.722	0.398	0.000317092
CYB561A3	6.60203e-08	0.349659	0.567	0.286	0.0017158
ZFYVE16	1.69236e-06	0.349169	0.7	0.412	0.0439827
CD52	0.00591245	0.347039	0.822	0.672	1
RBMS1	9.95694e-09	0.346845	0.822	0.533	0.000258771
LY96	2.7132e-07	0.346695	0.867	0.64	0.00705134
KIAA0930	9.24973e-11	0.345418	0.711	0.334	2.40391e-06
LGALS3BP	6.44865e-09	0.345275	0.9	0.668	0.000167594
DNASE2	1.09417e-06	0.345127	0.856	0.61	0.0284363
RCAN1	8.18589e-11	0.34492	0.478	0.165	2.12743e-06
MT2A	0.10652	0.344534	0.844	0.73	1
FTH1	5.31934e-09	0.343355	1	1	0.000138244
KCNJ5	2.48819e-18	0.341063	0.5	0.113	6.46656e-14
ATP6V0D1	3.63235e-05	0.340168	0.844	0.692	0.944012
APLP2	5.13608e-09	0.34002	1	0.922	0.000133481
ELL2	3.25186e-10	0.339837	0.544	0.227	8.45125e-06
HLA-A	1.54141e-09	0.33923	1	0.974	4.00597e-05
CORO1C	6.83916e-09	0.339055	0.9	0.61	0.000177743
CST7	4.17566e-14	0.336671	0.356	0.074	1.08521e-09
ATP6V1F	7.22717e-10	0.333901	1	0.877	1.87827e-05
SGTB	4.55557e-14	0.331536	0.567	0.185	1.18395e-09
SEPHS2	8.28122e-10	0.328867	0.744	0.374	2.15221e-05
HAMP	1.16427e-07	0.327458	0.278	0.085	0.00302582
IL7R	3.94477e-08	0.327426	0.5	0.207	0.00102521
HTRA4	8.02085e-13	0.326317	0.422	0.115	2.08454e-08
RMDN3	6.01154e-07	0.326201	0.567	0.278	0.0156234
LGALS9	1.22657e-06	0.32527	0.911	0.753	0.0318772
COL4A3BP	3.26069e-11	0.324665	0.767	0.362	8.47422e-07
SRGN	4.74777e-06	0.324075	0.989	0.988	0.12339
NAGK	2.31609e-08	0.322673	0.889	0.646	0.000601928
DNPH1	4.76221e-08	0.32236	0.722	0.41	0.00123765
DCAF7	1.16894e-07	0.321885	0.767	0.477	0.00303796
MARCKS	0.000273458	0.321216	0.956	0.841	1
C5AR1	1.42016e-06	0.321085	0.789	0.527	0.0369085
PLIN2	0.0196833	0.320311	0.911	0.821	1
AMDHD2	2.51977e-11	0.32018	0.489	0.173	6.54864e-07
OSM	9.22612e-05	0.31969	0.244	0.101	1
SLCO2B1	4.32967e-08	0.317928	0.9	0.63	0.00112524
LAP3	5.93525e-07	0.316871	0.944	0.763	0.0154251
ATP6V0B	1.79317e-09	0.316432	0.956	0.891	4.66028e-05
SCD	3.01852e-09	0.315923	0.644	0.296	7.84484e-05
ANKRD12	3.69908e-05	0.314288	0.822	0.616	0.961353
ANXA6	6.05615e-14	0.313285	0.678	0.268	1.57393e-09
ACP2	3.86466e-13	0.312541	0.756	0.328	1.00439e-08
CD81	2.18914e-07	0.312	0.989	0.817	0.00568935
MAF	4.48416e-06	0.31163	0.667	0.412	0.116539
CXCL1	5.87977e-05	0.31147	0.133	0.034	1
OAS1	1.96768e-05	0.310899	0.756	0.517	0.51138
ZFAND5	1.13166e-07	0.309275	0.956	0.807	0.00294107
TMEM176B	0.000173015	0.307999	0.889	0.751	1
MFSD1	2.58259e-06	0.307564	0.933	0.819	0.0671189
ERRFI1	4.92681e-05	0.307348	0.389	0.195	1
THBD	0.00320408	0.306787	0.444	0.274	1
TMEM176A	5.04231e-05	0.30678	0.8	0.658	1
TCEAL9	1.35447e-10	0.302861	0.678	0.288	3.52013e-06
MX2	1.17194e-07	0.302475	0.678	0.366	0.00304576
MCOLN1	4.12313e-17	0.302125	0.633	0.185	1.07156e-12
CXCL3	2.31361e-05	0.301527	0.411	0.197	0.601284
SNX1	1.03237e-06	0.301256	0.878	0.614	0.0268302
AP2A2	1.15214e-10	0.300512	0.611	0.262	2.99428e-06
NCEH1	3.55549e-11	0.298958	0.778	0.376	9.24037e-07
GRINA	1.34523e-08	0.298682	0.967	0.686	0.000349613
TGFBI	0.0882153	0.297602	0.956	0.915	1
CLIC2	4.81597e-09	0.296449	0.589	0.256	0.000125162
C1S	6.13944e-17	0.295022	0.311	0.044	1.59558e-12
DUSP3	7.72412e-08	0.293106	0.733	0.398	0.00200742
SCCPDH	2.94571e-11	0.29265	0.711	0.332	7.6556e-07
LAMP2	1.21091e-06	0.292251	0.967	0.805	0.0314704
OLFML2B	6.3218e-10	0.291918	0.5	0.189	1.64297e-05
SCPEP1	3.39085e-06	0.290918	0.978	0.799	0.0881249
H2AFJ	4.6988e-07	0.290244	0.822	0.509	0.0122117
NLN	2.69482e-09	0.290007	0.544	0.231	7.00357e-05
SLC18B1	3.16518e-12	0.289958	0.444	0.139	8.22598e-08
SLC31A1	1.83632e-09	0.289823	0.744	0.368	4.77242e-05
CDS2	6.95646e-13	0.288711	0.556	0.191	1.80791e-08
SAT1	3.27177e-08	0.288643	1	0.986	0.000850301
RIT1	9.05009e-10	0.288188	0.756	0.376	2.35203e-05
CMPK2	2.53332e-10	0.287177	0.489	0.179	6.58385e-06
M6PR	4.28321e-07	0.287008	0.922	0.684	0.0111316
RNF213	1.9071e-05	0.286971	0.9	0.668	0.495636
GRN	8.40914e-09	0.28689	1	0.984	0.000218545
TMEM140	7.77302e-10	0.286886	0.6	0.254	2.02013e-05
HSD17B14	4.704e-11	0.286601	0.511	0.183	1.22252e-06
SLC35F6	1.13638e-11	0.2852	0.611	0.235	2.95334e-07
HAVCR2	5.58901e-06	0.284533	0.9	0.648	0.145253
PSMA3	1.51865e-07	0.282311	0.9	0.638	0.00394682
TNS3	6.77348e-10	0.281686	0.767	0.384	1.76036e-05
EPAS1	3.62099e-12	0.281282	0.611	0.231	9.41058e-08
SLC36A1	7.36804e-17	0.280193	0.411	0.083	1.91488e-12
WBP2	1.96656e-08	0.280125	0.844	0.513	0.000511089
CHST11	5.07676e-06	0.280104	0.733	0.455	0.13194
RAB1A	1.31322e-06	0.280017	0.911	0.686	0.0341293
OASL	1.69661e-09	0.279876	0.422	0.147	4.40931e-05
NRP2	4.73229e-10	0.279819	0.756	0.356	1.22987e-05
ATP6AP1	6.05619e-08	0.279763	0.922	0.803	0.00157394
ATP6V1C1	6.07751e-07	0.2788	0.722	0.427	0.0157948
TNFAIP2	2.38671e-09	0.278395	0.8	0.419	6.20281e-05
NINJ1	2.18635e-05	0.277656	0.822	0.644	0.56821
CALU	8.76248e-07	0.277625	0.778	0.485	0.0227728
CALR	9.89248e-05	0.277448	0.978	0.893	1
SMS	4.5145e-08	0.276986	0.811	0.487	0.00117327
PI4K2A	9.38926e-12	0.275906	0.533	0.185	2.44018e-07
PLXND1	3.56047e-08	0.275887	0.733	0.416	0.00092533
FCHO2	7.26408e-06	0.274852	0.833	0.555	0.188786
SNX2	6.1924e-05	0.274706	0.9	0.767	1
MMD	1.04793e-12	0.274317	0.533	0.173	2.72347e-08
STOM	1.2942e-06	0.274112	0.822	0.557	0.033635
IFI35	6.54056e-06	0.273541	0.656	0.41	0.169982
CTSS	1.03117e-06	0.271267	1	0.994	0.0267991
MSR1	0.000290559	0.271139	0.922	0.753	1
GCHFR	8.29088e-06	0.271129	0.611	0.334	0.215472
SLC6A6	3.96671e-07	0.270926	0.511	0.237	0.0103091
TNS1	3.42312e-13	0.269935	0.444	0.121	8.89635e-09
SLC38A7	4.11779e-16	0.269818	0.489	0.121	1.07017e-11
PITHD1	1.9285e-12	0.26902	0.567	0.193	5.01199e-08
EDNRB	9.62264e-10	0.2679	0.189	0.03	2.50083e-05
VWA5A	3.19057e-09	0.267795	0.489	0.181	8.29198e-05
METRNL	5.70133e-09	0.267337	0.578	0.254	0.000148172
HAGHL	8.23128e-13	0.26603	0.433	0.127	2.13923e-08
A2M	0.000152192	0.26593	0.944	0.839	1
ENPP2	1.21336e-06	0.264433	0.611	0.306	0.0315341
RNF13	7.58626e-06	0.263304	0.889	0.718	0.197159
ATP2A2	1.00438e-07	0.262447	0.756	0.408	0.00261027
CBR1	1.11567e-05	0.262428	0.8	0.537	0.289951
PLEKHM2	2.79237e-10	0.262108	0.533	0.199	7.2571e-06
NTAN1	6.98541e-08	0.261209	0.622	0.316	0.00181544
MAPK13	1.18989e-11	0.261145	0.478	0.157	3.0924e-07
ME1	1.09088e-07	0.260575	0.4	0.155	0.00283509
SAMD9L	0.000191215	0.259363	0.844	0.624	1
MYO9B	2.31365e-05	0.258771	0.789	0.535	0.601295
SGPL1	2.82536e-09	0.258183	0.5	0.209	7.34283e-05
CTSK	1.74247e-06	0.25714	0.256	0.08	0.0452851
SLC22A18	2.79716e-09	0.257101	0.478	0.189	7.26955e-05
CYSTM1	3.80345e-05	0.255964	0.7	0.429	0.988479
ITGAX	4.15807e-05	0.255553	0.767	0.481	1
ASAP1	3.91353e-06	0.255163	0.756	0.481	0.101709
CR1	2.88457e-13	0.254666	0.411	0.105	7.4967e-09
KCNAB2	1.12548e-09	0.254593	0.733	0.344	2.92502e-05
TMEM37	4.22453e-15	0.254207	0.511	0.135	1.09791e-10
MMP2	2.06267e-08	0.253732	0.622	0.292	0.000536066
GNPTAB	1.29077e-06	0.253228	0.878	0.6	0.0335458
SMIM3	1.75944e-10	0.252986	0.578	0.227	4.5726e-06
CLTC	1.36302e-06	0.251487	0.922	0.722	0.0354235
DENND2D	3.76916e-13	0.250338	0.544	0.179	9.79566e-09
CEBPA	0.000190296	0.250123	0.567	0.352	1
RSL1D1	0.00310747	-0.250004	0.844	0.803	1
IFNGR2	0.00993326	-0.250242	0.811	0.736	1
RPL22	0.00016022	-0.250665	0.844	0.837	1
CDKN1A	0.137827	-0.250891	0.644	0.62	1
ZFP36L2	0.0114189	-0.250915	0.933	0.911	1
LPGAT1	0.0304992	-0.251237	0.333	0.404	1
PSMB8-AS1	0.00479289	-0.251806	0.233	0.336	1
RPL24	0.000184047	-0.251959	0.967	0.976	1
LILRA2	0.000258835	-0.252184	0.133	0.298	1
CXCL10	0.000588889	-0.252426	0.244	0.103	1
KLF9	0.0132171	-0.252527	0.478	0.525	1
LILRB1	0.00137079	-0.252664	0.256	0.398	1
CREB5	0.00327925	-0.252742	0.178	0.3	1
TMEM134	0.0205789	-0.253753	0.289	0.358	1
CAMK1D	0.0132333	-0.254357	0.378	0.451	1
LYST	0.0113072	-0.254816	0.422	0.509	1
EIF3K	0.00172841	-0.254824	0.9	0.899	1
CD1D	0.000937218	-0.255294	0.111	0.252	1
HTRA1	0.411738	-0.256325	0.233	0.254	1
B3GNT5	0.207685	-0.256581	0.622	0.608	1
TXNIP	0.00844626	-0.257229	0.989	0.984	1
PTMA	1.99437e-06	-0.257365	1	0.998	0.0518317
NUDT3	0.0307504	-0.257998	0.367	0.402	1
CLEC7A	0.00519208	-0.258158	0.822	0.803	1
RPL26	8.11253e-05	-0.25883	0.933	0.917	1
EMB	0.0162017	-0.259817	0.411	0.479	1
LCP2	0.0305188	-0.260053	0.744	0.69	1
PLCB2	0.00883827	-0.26037	0.333	0.419	1
VASH1	0.00776015	-0.261153	0.256	0.348	1
DSE	0.0480046	-0.26125	0.678	0.624	1
RPS28	3.0263e-05	-0.261302	0.978	0.994	0.786505
CST3	0.0017901	-0.261434	1	1	1
IL17RA	0.0147797	-0.26218	0.544	0.565	1
MIF4GD	0.0312039	-0.262239	0.422	0.443	1
ARHGAP15	0.00232977	-0.263433	0.344	0.439	1
CXorf21	0.0905114	-0.265125	0.333	0.38	1
P3H2	0.000579498	-0.265304	0.067	0.215	1
HLA-DRB1	0.000176632	-0.265652	1	1	1
SLC25A6	8.33225e-05	-0.266199	0.922	0.95	1
TAF7	0.0478099	-0.268539	0.589	0.583	1
RGS18	0.0244711	-0.268696	0.256	0.332	1
ANKRD44	0.00358808	-0.268986	0.222	0.332	1
HCST	0.0111169	-0.269009	0.722	0.753	1
RPSA	1.72597e-05	-0.269827	0.978	0.944	0.448563
OTUD1	0.705967	-0.270081	0.422	0.326	1
JMJD1C	0.02967	-0.270782	0.711	0.696	1
FXYD5	0.000248492	-0.271387	0.911	0.93	1
SLC8A1	0.00863368	-0.271421	0.511	0.555	1
RPS12	7.2532e-06	-0.27146	0.978	0.99	0.188503
SDCCAG8	0.0133939	-0.272362	0.556	0.596	1
TLR2	0.0113335	-0.273182	0.6	0.646	1
PRPF38B	0.012575	-0.273315	0.667	0.664	1
FBP1	0.648949	-0.273831	0.656	0.602	1
IGHG4	0.00224414	-0.274416	0.389	0.213	1
RPL10A	4.01239e-05	-0.274698	0.911	0.92	1
MT-RNR2	0.000167676	-0.275187	1	1	1
GBP4	0.0484798	-0.27522	0.367	0.419	1
HCLS1	0.00145384	-0.275785	0.811	0.805	1
CD74	2.14119e-05	-0.276144	1	1	0.556473
RPS29	7.18093e-07	-0.276344	0.978	0.998	0.0186625
APBB1IP	0.00382044	-0.276458	0.767	0.755	1
HSPE1	0.530865	-0.276477	0.944	0.815	1
RPS15	3.37209e-07	-0.276508	1	0.992	0.00876372
EEF1D	0.000422302	-0.276538	0.878	0.839	1
POLR1D	0.00104355	-0.276986	0.6	0.628	1
PLXDC2	0.00156107	-0.277085	0.922	0.863	1
SESN1	0.224122	-0.277953	0.422	0.412	1
LYZ	0.759893	-0.278116	0.989	0.984	1
SVBP	0.0336372	-0.279138	0.4	0.437	1
HNRNPA2B1	1.96902e-07	-0.279713	1	0.994	0.0051173
ARHGAP9	0.00302268	-0.27982	0.278	0.38	1
APEX1	0.000786294	-0.280017	0.522	0.59	1
PTPRE	0.216544	-0.280266	0.633	0.555	1
TMSB4X	1.15711e-08	-0.280546	1	1	0.000300721
SLA	0.000887336	-0.283107	0.678	0.726	1
SMAP2	0.00160737	-0.283337	0.711	0.736	1
PCED1B-AS1	0.0434526	-0.283569	0.467	0.487	1
SERPINB9	0.0181679	-0.283689	0.256	0.334	1
SOX4	0.326267	-0.283711	0.178	0.203	1
REL	0.0151615	-0.285139	0.533	0.551	1
TMEM173	0.00699648	-0.285584	0.244	0.332	1
KLF10	0.147948	-0.28598	0.4	0.425	1
ATP5MC2	3.94074e-05	-0.286279	0.956	0.95	1
FMNL3	0.00670433	-0.286431	0.256	0.354	1
HLA-DOA	0.0123794	-0.286665	0.678	0.676	1
RUNX1	0.0187377	-0.287311	0.556	0.577	1
CLNS1A	0.00118449	-0.289025	0.489	0.533	1
NCF1C	0.0203098	-0.289067	0.311	0.39	1
CD69	0.857134	-0.289131	0.456	0.412	1
RPS8	4.59106e-06	-0.289926	0.989	0.982	0.119317
BRK1	6.42791e-05	-0.292315	0.844	0.835	1
CYTIP	0.0910209	-0.292346	0.478	0.471	1
RPL39	3.28418e-06	-0.2927	0.944	0.972	0.0853525
CD1C	0.137592	-0.292966	0.133	0.179	1
INPP5D	0.015103	-0.293018	0.456	0.485	1
EVL	0.00209842	-0.293797	0.356	0.453	1
HLA-DQA2	0.155281	-0.294375	0.244	0.284	1
GPX3	0.000138446	-0.294518	0.944	0.901	1
ARPC2	8.17927e-07	-0.295321	0.967	0.982	0.0212571
TLR7	0.0242132	-0.29619	0.378	0.445	1
RPL7A	1.75538e-06	-0.296397	0.978	0.986	0.0456207
NUP214	0.00538403	-0.296796	0.4	0.483	1
HMGB2	0.0373476	-0.297221	0.678	0.634	1
HCAR2	0.017271	-0.298554	0.089	0.187	1
RPS15A	6.41405e-06	-0.299339	0.944	0.942	0.166695
RACK1	1.06838e-06	-0.299405	0.978	0.978	0.0277662
RETN	0.044178	-0.299756	0.167	0.252	1
HLA-DRB5	0.0268784	-0.299995	0.733	0.706	1
MEF2A	0.00441048	-0.300922	0.778	0.742	1
GAS5	0.00688211	-0.301236	0.478	0.509	1
VASP	0.00184016	-0.301778	0.7	0.686	1
FCGR1B	0.00478259	-0.301982	0.3	0.404	1
ZYX	2.35555e-05	-0.302228	0.878	0.869	0.612183
UBC	0.0759628	-0.303869	1	0.988	1
S100A10	0.11978	-0.303869	0.978	0.928	1
DNAJB4	0.1498	-0.304379	0.311	0.354	1
TMEM14C	0.000920415	-0.305043	0.778	0.805	1
ZFAS1	0.0107382	-0.305682	0.711	0.71	1
TMEM109	0.00449613	-0.30635	0.6	0.577	1
PICALM	0.00084422	-0.307554	0.878	0.863	1
MBNL1	0.000202316	-0.308024	0.867	0.865	1
IGLC2	0.452527	-0.308323	0.189	0.149	1
C6orf48	0.0117171	-0.308888	0.711	0.666	1
LRRC75A-AS1	0.00021363	-0.309143	0.811	0.809	1
RPS20	2.80887e-08	-0.309231	0.989	0.998	0.000729997
EIF3H	0.000102993	-0.310069	0.844	0.825	1
RGS19	0.0013671	-0.311001	0.522	0.612	1
RPS6KA3	0.00182331	-0.31153	0.389	0.463	1
SNHG6	0.00542359	-0.311827	0.656	0.664	1
RPL4	2.21228e-06	-0.312257	0.978	0.972	0.0574949
HCK	0.000157771	-0.312528	0.722	0.757	1
RPL18	4.63502e-08	-0.313646	1	0.994	0.0012046
STK38L	0.00131205	-0.313836	0.3	0.427	1
C3AR1	0.0105377	-0.314413	0.8	0.761	1
NOP53	0.000206732	-0.316092	0.644	0.688	1
EIF3F	0.000844594	-0.316927	0.567	0.6	1
RTN1	0.000525564	-0.317116	0.211	0.352	1
UBA52	4.55688e-08	-0.317125	0.967	0.988	0.00118429
LSP1	0.000369202	-0.317588	0.556	0.702	1
PLEK2	0.0292347	-0.318081	0.167	0.241	1
TLR1	0.0187005	-0.318119	0.478	0.479	1
CITED2	0.0365615	-0.318189	0.678	0.696	1
BROX	0.00170353	-0.318747	0.6	0.61	1
DUSP6	0.00643898	-0.318773	0.489	0.557	1
CYBB	1.01358e-05	-0.319627	0.933	0.952	0.26342
PTGS1	0.000618698	-0.320338	0.378	0.493	1
GPSM3	8.35964e-05	-0.321312	0.667	0.722	1
RPL41	1.0906e-06	-0.321652	0.944	0.934	0.0283435
RHOG	1.34952e-05	-0.322335	0.867	0.823	0.350726
FOXN2	0.00422746	-0.322374	0.544	0.557	1
CPED1	0.000191975	-0.322465	0.189	0.354	1
ARL4A	0.196913	-0.323395	0.456	0.437	1
RPS9	1.78974e-07	-0.323601	0.989	0.986	0.00465136
RPL37A	7.23333e-08	-0.323855	1	0.996	0.00187987
SKIL	0.000181863	-0.326933	0.589	0.67	1
P2RY12	1.44348e-05	-0.327362	0.078	0.28	0.375145
JUNB	0.0166769	-0.328549	0.956	0.917	1
EIF4A2	0.0007423	-0.330005	0.922	0.907	1
RPS25	9.82892e-08	-0.330486	0.956	0.982	0.00255444
PPA1	0.0152003	-0.330518	0.5	0.529	1
EVI2B	0.000266971	-0.331012	0.833	0.829	1
MIS18BP1	0.00308554	-0.332791	0.567	0.573	1
CD58	0.00512682	-0.333337	0.689	0.642	1
RNF166	0.000204095	-0.334148	0.356	0.481	1
RNASE6	0.00611472	-0.33504	0.6	0.674	1
HSPD1	0.131723	-0.335722	0.878	0.823	1
CSF1R	0.000205998	-0.335759	0.744	0.839	1
DOCK10	0.000654393	-0.336227	0.511	0.594	1
RPL23	1.28115e-08	-0.336234	0.978	0.996	0.000332958
HLA-DQA1	0.00578702	-0.338862	0.989	0.986	1
FKBP5	0.00080686	-0.340478	0.711	0.714	1
MS4A6A	0.000529164	-0.340579	0.867	0.875	1
RPLP1	1.88525e-11	-0.340909	1	1	4.89958e-07
RPS11	1.0126e-09	-0.341404	1	0.998	2.63166e-05
GIMAP4	0.000682827	-0.341569	0.633	0.712	1
OLFML3	6.50318e-05	-0.341855	0.111	0.312	1
RPS6	1.00837e-09	-0.342179	1	1	2.62067e-05
HLA-DMA	8.90859e-07	-0.342376	0.967	0.986	0.0231525
RPS21	5.01535e-08	-0.343417	0.956	0.984	0.00130344
TM6SF1	0.000353219	-0.348379	0.511	0.59	1
LCP1	1.39539e-07	-0.349003	0.967	0.96	0.00362649
FAM49B	8.21419e-06	-0.354165	0.822	0.817	0.213479
RPS7	4.70475e-08	-0.35503	0.967	0.982	0.00122272
JAZF1	4.03112e-06	-0.355259	0.189	0.427	0.104765
RNF149	0.000841908	-0.356153	0.644	0.664	1
HSP90AB1	0.0935931	-0.357849	1	0.99	1
RPL37	1.62689e-09	-0.358456	0.978	0.994	4.22811e-05
ATF3	0.363524	-0.359217	0.633	0.565	1
FCN1	0.834624	-0.360837	0.244	0.241	1
RBM39	7.70187e-06	-0.361692	0.9	0.895	0.200164
SRSF3	0.00135318	-0.362178	0.878	0.783	1
RPL8	7.28965e-11	-0.363343	0.967	0.996	1.89451e-06
NDRG2	8.63958e-05	-0.364318	0.178	0.35	1
CLEC12A	0.00268582	-0.368483	0.289	0.39	1
ALOX5	3.45554e-05	-0.3687	0.722	0.765	0.89806
DUSP1	0.193482	-0.369244	0.989	0.956	1
CNTRL	0.000604068	-0.369493	0.378	0.493	1
POU2F2	6.62616e-06	-0.370307	0.1	0.314	0.172207
ADAM28	0.000155588	-0.370521	0.244	0.39	1
RPS24	7.8551e-10	-0.371081	0.989	0.992	2.04146e-05
ST6GAL1	0.00491867	-0.371721	0.4	0.471	1
PMAIP1	0.00393772	-0.372993	0.167	0.292	1
S100A6	1.44427e-06	-0.37315	1	0.986	0.0375351
RPL9	1.68445e-10	-0.37339	0.944	0.992	4.37773e-06
RPS18	1.63026e-09	-0.373552	0.989	0.996	4.23689e-05
2022-03-01	2.36906e-05	-0.373777	0.7	0.751	0.615694
SAP30	0.00174292	-0.374796	0.244	0.366	1
LIMD2	0.000199723	-0.375202	0.389	0.521	1
GADD45B	0.0464322	-0.377304	0.867	0.821	1
FCGR2B	0.0054361	-0.377359	0.8	0.785	1
HCAR3	0.0887646	-0.378453	0.089	0.153	1
C1orf162	3.4362e-05	-0.379092	0.867	0.901	0.893033
RPS2	2.39604e-10	-0.381211	0.989	0.998	6.22707e-06
SH3KBP1	0.000461901	-0.38172	0.567	0.581	1
LPAR6	0.00811409	-0.381737	0.878	0.791	1
RPL32	1.3114e-09	-0.384477	0.978	0.998	3.40821e-05
ACTB	3.41164e-08	-0.384571	1	0.998	0.000886652
RPL27	1.14773e-09	-0.384678	0.978	0.986	2.98283e-05
SGK1	0.356021	-0.385645	0.944	0.895	1
RPL34	1.27224e-11	-0.387004	0.989	1	3.30644e-07
BHLHE41	0.012947	-0.387317	0.5	0.533	1
CMTM3	1.86899e-05	-0.387339	0.633	0.72	0.485731
HLA-DRA	1.18465e-08	-0.387361	1	1	0.00030788
RPL3	2.2894e-10	-0.389997	1	0.988	5.94992e-06
TPT1	2.39701e-13	-0.390293	1	0.998	6.22958e-09
RPS5	5.90923e-09	-0.392337	0.956	0.964	0.000153575
FILIP1L	0.000616727	-0.392537	0.278	0.449	1
CD93	0.000160668	-0.393428	0.311	0.469	1
DOCK8	2.56114e-06	-0.393718	0.556	0.672	0.0665614
RPL31	9.74818e-12	-0.394985	1	0.998	2.53346e-07
EEF1A1	3.51648e-14	-0.395784	1	1	9.13898e-10
ALDH2	0.000308567	-0.396452	0.733	0.763	1
RPL14	1.02111e-09	-0.396946	1	0.994	2.65376e-05
ATP2B1-AS1	0.0295583	-0.39721	0.256	0.324	1
RPS16	7.16815e-12	-0.397535	1	0.994	1.86293e-07
PTPRC	6.06627e-08	-0.401877	0.922	0.934	0.00157656
HNRNPA1	6.43328e-09	-0.402263	0.911	0.934	0.000167194
PKIB	0.00400202	-0.402452	0.289	0.394	1
RPL11	2.13728e-13	-0.403955	0.989	0.996	5.55459e-09
RPLP2	1.42641e-14	-0.403985	1	1	3.70709e-10
ANKRD22	1.79195e-05	-0.404084	0.111	0.312	0.465711
MYC	0.0100921	-0.41261	0.356	0.433	1
DDX5	8.39286e-09	-0.415283	1	0.996	0.000218122
RPL6	1.81671e-11	-0.418546	0.967	0.976	4.72144e-07
TSC22D3	1.13225e-05	-0.418733	0.822	0.877	0.294259
FCGR2C	1.57076e-05	-0.419204	0.189	0.38	0.408226
RPS23	9.24088e-12	-0.421683	0.989	0.992	2.40161e-07
KLF4	0.0281855	-0.422701	0.656	0.642	1
RPS19	8.96533e-13	-0.423246	0.978	0.992	2.33e-08
PTGER4	0.00556175	-0.423591	0.411	0.489	1
TUBA1A	0.000379863	-0.427153	0.7	0.702	1
PYCARD	3.29674e-06	-0.42932	0.778	0.811	0.0856789
RPL7	8.37188e-12	-0.429538	0.978	0.962	2.17577e-07
PABPC1	1.78028e-14	-0.429791	1	0.998	4.62678e-10
VCAN	0.252382	-0.430899	0.222	0.26	1
PLP2	3.95057e-06	-0.431246	0.5	0.64	0.102671
ARHGDIB	1.1819e-09	-0.43363	0.9	0.962	3.07165e-05
RPL30	1.78892e-15	-0.433746	1	0.996	4.64922e-11
RHOB	0.00236711	-0.436137	0.667	0.66	1
RPL35A	8.51586e-11	-0.437293	0.978	0.992	2.21319e-06
RPS3	6.46814e-14	-0.438188	1	0.992	1.681e-09
CORO1A	1.67813e-05	-0.4421	0.378	0.539	0.436128
MCEMP1	0.00351915	-0.442205	0.067	0.191	1
FOSB	0.329449	-0.443697	0.644	0.592	1
NR4A1	0.155684	-0.444023	0.444	0.425	1
RPL13	4.16756e-17	-0.445807	0.989	1	1.08311e-12
IL13RA1	2.06281e-06	-0.446678	0.778	0.813	0.0536103
TWISTNB	0.818978	-0.446879	0.422	0.378	1
RPLP0	3.30368e-12	-0.44876	0.967	0.99	8.58595e-08
BAG3	0.735769	-0.449663	0.289	0.27	1
FGL2	5.1836e-06	-0.449772	0.789	0.859	0.134717
HPGDS	0.0199424	-0.449851	0.311	0.366	1
HACD4	0.000100063	-0.449867	0.478	0.573	1
TNFAIP3	0.00935682	-0.450958	0.567	0.626	1
KLF2	0.00833944	-0.454896	0.256	0.36	1
CCNL1	0.000949312	-0.456516	0.833	0.763	1
SNHG8	3.33383e-05	-0.457931	0.522	0.642	0.866429
PLAC8	0.0103586	-0.459741	0.111	0.215	1
RPL29	3.15006e-13	-0.459761	0.978	0.986	8.18669e-09
RGS10	6.35369e-08	-0.459863	0.889	0.887	0.00165126
BTG2	0.00372467	-0.462472	0.589	0.622	1
RPL13A	4.27483e-14	-0.462861	1	0.996	1.11099e-09
RPS27	3.27184e-14	-0.46313	0.989	1	8.5032e-10
ID2	3.67436e-05	-0.465528	0.856	0.879	0.95493
COMMD6	4.50494e-09	-0.466837	0.833	0.857	0.000117079
PNRC1	7.23559e-07	-0.46757	0.878	0.909	0.0188046
RHOC	3.74174e-07	-0.468127	0.511	0.66	0.00972442
S100A8	0.739246	-0.46835	0.356	0.322	1
FCGR1A	3.17898e-06	-0.47238	0.6	0.726	0.0826185
HLA-DRB6	0.0955994	-0.475325	0.278	0.328	1
RPL10	6.68831e-16	-0.475419	1	0.998	1.73822e-11
RPL15	3.24252e-17	-0.475626	0.978	0.996	8.427e-13
IFNGR1	5.17066e-08	-0.481184	0.922	0.942	0.0013438
RPS13	1.86562e-14	-0.481555	0.967	0.998	4.84857e-10
AIF1	5.29662e-10	-0.481853	0.956	0.97	1.37654e-05
OGFRL1	7.86478e-05	-0.484815	0.722	0.757	1
LPCAT2	4.31268e-08	-0.485806	0.667	0.753	0.00112082
CCL17	0.990892	-0.486072	0.2	0.179	1
LTC4S	2.13855e-05	-0.486999	0.178	0.372	0.555787
RPS27A	5.02788e-17	-0.49315	1	1	1.30669e-12
RPS3A	4.11334e-14	-0.493253	0.978	0.994	1.06902e-09
SNHG5	3.18266e-07	-0.494197	0.744	0.785	0.00827142
PLK2	0.00150946	-0.494488	0.133	0.272	1
FN1	0.0544904	-0.496614	0.856	0.797	1
HSPB1	0.206852	-0.498237	0.989	0.863	1
NR4A2	0.0791412	-0.499128	0.233	0.288	1
USP53	9.70148e-07	-0.502206	0.111	0.356	0.0252132
CLEC10A	0.00348604	-0.505462	0.333	0.417	1
FCER1A	0.0693591	-0.51214	0.1	0.163	1
SRSF7	5.48087e-05	-0.512629	0.822	0.857	1
PAK1	1.31344e-07	-0.516356	0.533	0.658	0.0034135
BTG1	1.44031e-09	-0.522174	0.844	0.92	3.74322e-05
STK17B	2.49196e-07	-0.524092	0.367	0.557	0.00647634
NFKBIA	1.6265e-05	-0.52517	0.967	0.97	0.422712
PTGS2	0.00803954	-0.525848	0.1	0.207	1
GLIPR1	1.21009e-09	-0.531343	0.722	0.859	3.14489e-05
ZFAND2A	0.148106	-0.534315	0.267	0.302	1
ITGA4	1.69493e-06	-0.535507	0.367	0.531	0.0440495
IGHG3	0.339569	-0.535755	0.222	0.167	1
FOS	0.00727916	-0.537163	0.956	0.986	1
RPS14	1.20375e-19	-0.538254	0.978	0.996	3.12844e-15
RPL23A	2.61313e-18	-0.542315	0.956	0.988	6.79127e-14
LAT2	3.11535e-10	-0.543744	0.356	0.61	8.09648e-06
RPL5	4.27257e-18	-0.544687	1	0.992	1.1104e-13
DDIT4	1.96027e-05	-0.544996	0.356	0.513	0.509455
KLF6	0.000359283	-0.54657	0.944	0.938	1
CCR2	4.74815e-09	-0.547125	0.033	0.336	0.0001234
GPR34	0.000338614	-0.547466	0.656	0.668	1
HSPA6	0.636377	-0.554248	0.3	0.286	1
HERPUD1	3.35877e-05	-0.555235	0.811	0.855	0.872912
TRA2B	0.00377383	-0.559069	0.756	0.706	1
RPL21	3.86983e-17	-0.560183	0.956	0.994	1.00573e-12
NFKBIZ	0.00719364	-0.561731	0.367	0.443	1
RAC2	4.77793e-10	-0.564022	0.411	0.644	1.24174e-05
SERPINA1	5.66508e-11	-0.566373	0.878	0.942	1.4723e-06
COTL1	2.65842e-10	-0.567929	0.9	0.907	6.90897e-06
JAML	1.08319e-07	-0.568659	0.511	0.67	0.00281511
FPR1	4.81525e-07	-0.569247	0.544	0.704	0.0125144
MNDA	9.9731e-09	-0.569822	0.922	0.901	0.000259191
HSP90AA1	0.296583	-0.572518	1	0.99	1
IGHG1	0.102952	-0.57624	0.544	0.402	1
RPL18A	2.86162e-19	-0.579394	0.956	0.992	7.43706e-15
EGR2	0.0721388	-0.585615	0.444	0.465	1
EEF1B2	9.96773e-15	-0.592516	0.867	0.96	2.59051e-10
CXCR4	2.6653e-05	-0.593851	0.656	0.72	0.692686
CD83	0.0630578	-0.597024	0.6	0.592	1
SORL1	1.78551e-09	-0.599977	0.344	0.61	4.64037e-05
FCGR2A	8.8769e-09	-0.605451	0.889	0.907	0.000230702
HLA-DPB1	5.88852e-12	-0.607238	1	0.99	1.53037e-07
HLA-DPA1	6.05821e-11	-0.607437	1	1	1.57447e-06
PPP1R15A	0.00309049	-0.622393	0.711	0.71	1
PEA15	4.99731e-12	-0.625855	0.622	0.795	1.29875e-07
GAPT	8.55421e-10	-0.626673	0.144	0.459	2.22315e-05
VSIG4	3.70309e-07	-0.645151	0.567	0.753	0.00962396
RGS2	0.114119	-0.652936	0.767	0.742	1
RGS1	0.117374	-0.665101	0.956	0.855	1
PLD4	3.53241e-08	-0.671889	0.2	0.477	0.000918039
MEF2C	7.89723e-09	-0.678396	0.533	0.684	0.000205241
VSIR	1.27736e-10	-0.700672	0.467	0.672	3.31972e-06
LST1	2.40041e-16	-0.713672	0.678	0.881	6.23843e-12
IER3	2.21948e-05	-0.716141	0.633	0.757	0.57682
EGR1	0.00208021	-0.72537	0.789	0.759	1
FCGBP	0.000199462	-0.733768	0.122	0.284	1
IER5	0.000936421	-0.749467	0.622	0.632	1
NAPSB	8.31017e-08	-0.765001	0.422	0.594	0.00215973
FCGR3A	5.95228e-09	-0.775268	0.667	0.813	0.000154694
CKLF	3.09888e-14	-0.777075	0.411	0.73	8.05367e-10
CLEC5A	1.10676e-10	-0.817517	0.278	0.583	2.87637e-06
HSPH1	0.535172	-0.831411	0.8	0.7	1
TNF	0.000169628	-0.869589	0.2	0.38	1
CCL3	0.00352514	-0.879565	0.744	0.73	1
OLR1	7.97093e-13	-0.893853	0.578	0.767	2.07157e-08
ALOX5AP	1.20146e-12	-0.903912	0.756	0.891	3.12247e-08
JUN	1.47911e-09	-0.911912	0.989	0.988	3.84406e-05
IER2	1.3896e-06	-0.923975	0.756	0.801	0.0361143
CX3CR1	1.90138e-13	-0.962732	0.033	0.449	4.94149e-09
CLDN1	2.7976e-07	-0.987634	0.222	0.459	0.00727068
HSPA1B	0.000418273	-1.02895	0.767	0.757	1
HSPA1A	2.02881e-05	-1.05433	0.944	0.928	0.527268
YWHAH	1.8766e-16	-1.06305	0.756	0.851	4.87709e-12
DNAJB1	0.0306694	-1.07794	0.911	0.793	1
C3	6.76052e-11	-1.11313	0.378	0.648	1.75699e-06
CXCL8	0.063737	-1.16258	0.544	0.539	1
P2RY13	2.59517e-10	-1.18297	0.444	0.666	6.74458e-06
CCL4	0.0145061	-1.38478	0.733	0.674	1
S100A4	1.52449e-23	-1.39024	0.822	0.936	3.962e-19
CCL3L1	6.12575e-05	-1.4937	0.444	0.571	1
IL1B	5.04125e-06	-1.58571	0.322	0.499	0.131017
CCL4L2	2.35783e-06	-1.61066	0.4	0.598	0.0612776

## Sheet: P21120201.clusterMacrophages4_d
gene_id	p_val	avg_logFC	pct.1	pct.2	p_val_adj
ALOX5AP	2.2e-23	0.891799	1	0.848	5.72e-19
CX3CR1	1.24e-26	0.880476	0.886	0.299	3.22e-22
PLD4	5.88e-23	0.864819	0.841	0.364	1.53e-18
C3	1.99e-16	0.836953	0.92	0.552	5.18e-12
YWHAH	6.77e-23	0.825432	0.977	0.812	1.76e-18
S100B	1.14e-05	0.793806	0.341	0.17	0.296361
CCL17	0.266328	0.727589	0.216	0.176	1
HPGDS	1.71e-14	0.699214	0.682	0.301	4.44e-10
FCGBP	5.24e-06	0.657654	0.443	0.228	0.136158
CKLF	6.86e-17	0.623662	0.909	0.642	1.78e-12
NDRG2	2.05e-24	0.623219	0.761	0.248	5.33e-20
MEF2C	1.5e-16	0.621638	0.932	0.614	3.91e-12
CD1C	0.000258183	0.60767	0.295	0.15	1
CD93	1.05e-13	0.602579	0.75	0.392	2.72e-09
HLA-DRB5	8.36e-11	0.592291	0.818	0.691	2.17e-06
HLA-DPA1	4.85e-20	0.581667	1	1	1.26e-15
OLFML3	4.57e-14	0.57688	0.591	0.228	1.19e-09
PAK1	5.51e-17	0.561642	0.92	0.59	1.43e-12
STMN1	4.55e-07	0.557478	0.659	0.457	0.011822
PKIB	6.42e-10	0.557468	0.625	0.335	1.67e-05
S100A4	2.09e-12	0.552627	1	0.905	5.43e-08
MS4A6A	1.11e-14	0.550054	1	0.851	2.9e-10
MNDA	1.52e-15	0.541827	1	0.887	3.95e-11
HLA-DQA1	5.95e-12	0.541164	1	0.984	1.55e-07
IFNGR1	1.85e-14	0.53781	1	0.929	4.81e-10
NAPSB	5.64e-13	0.528985	0.875	0.515	1.46e-08
F13A1	1.02e-10	0.524576	0.875	0.552	2.65e-06
ARHGDIB	4.79e-18	0.511087	1	0.945	1.24e-13
LPAR6	1.3e-14	0.509133	0.977	0.774	3.37e-10
FCGR2A	1.17e-12	0.497232	0.977	0.891	3.05e-08
FCER1A	0.0144559	0.496136	0.239	0.139	1
ITGA4	2.28e-07	0.495368	0.682	0.475	0.00592526
CD74	6.48e-22	0.491933	1	1	1.68e-17
RGS19	1.47e-11	0.486895	0.83	0.558	3.83e-07
PYCARD	2.34e-12	0.484669	0.955	0.78	6.08e-08
GAPT	4.8e-12	0.476558	0.727	0.356	1.25e-07
CST3	1.54e-12	0.470258	1	1	4e-08
ST6GAL1	2.75e-10	0.466308	0.75	0.41	7.13e-06
ACTB	8.78e-14	0.466172	1	0.998	2.28e-09
OGFRL1	1.11e-09	0.46549	0.909	0.725	2.9e-05
CORO1A	1.2e-11	0.465127	0.807	0.463	3.11e-07
CLEC5A	1.46e-10	0.464976	0.818	0.487	3.8e-06
COTL1	4.08e-10	0.459417	0.977	0.893	1.06e-05
CLDN1	1.81e-13	0.458759	0.795	0.358	4.7e-09
JAZF1	2.96e-10	0.456006	0.636	0.349	7.7e-06
DDIT4	1.24e-06	0.453903	0.636	0.463	0.0321902
HLA-DPB1	1.72e-15	0.453431	1	0.99	4.46e-11
GPR34	4.27e-07	0.450231	0.818	0.64	0.0111066
HLA-DRB1	1.98e-16	0.449551	1	1	5.15e-12
VSIR	8.2e-10	0.448664	0.852	0.604	2.13e-05
TMEM14C	1.52e-08	0.444652	0.886	0.786	0.000394306
P2RY12	7.02e-14	0.444353	0.568	0.194	1.83e-09
PLEK2	7.35e-07	0.443075	0.42	0.196	0.0191036
RHOC	6.46e-11	0.443029	0.852	0.6	1.68e-06
RAB31	4.5e-11	0.438276	0.92	0.857	1.17e-06
AIF1	2.7e-13	0.429608	1	0.962	7e-09
HACD4	2.59e-06	0.428393	0.739	0.527	0.0672636
HLA-DRA	3.12e-15	0.427662	1	1	8.1e-11
CCR2	2.84e-10	0.427263	0.568	0.242	7.38e-06
RAB32	3.73e-07	0.426787	0.841	0.743	0.0096991
C1QC	3.53e-08	0.422959	0.966	0.863	0.000918118
RGS10	3.23e-10	0.419157	0.943	0.877	8.39e-06
SKIL	1.51e-06	0.416616	0.784	0.636	0.0393562
AL138899.1	6.99e-07	0.413003	0.227	0.067	0.0181771
CLEC10A	8.64e-05	0.412176	0.58	0.374	1
MILR1	1.61e-08	0.409388	0.648	0.384	0.000417684
SPINT2	4.45e-11	0.407927	0.955	0.768	1.16e-06
PFN1	8.03e-14	0.407252	1	0.998	2.09e-09
TLR7	5.34e-07	0.404716	0.636	0.4	0.0138782
ETS2	2.93e-06	0.403739	0.864	0.778	0.0760256
TRPM4	9.66e-12	0.403222	0.341	0.091	2.51e-07
PEA15	5.19e-08	0.402203	0.864	0.752	0.00134839
LST1	6.66e-10	0.400343	0.966	0.83	1.73e-05
ACTR2	2.56e-13	0.39444	0.989	0.935	6.65e-09
GSN	6.04e-08	0.393825	0.943	0.883	0.00157072
IL13RA1	8.87e-08	0.393787	0.886	0.794	0.00230471
FGL2	7.35e-10	0.391376	0.955	0.83	1.91e-05
RHOG	7.74e-09	0.390619	0.898	0.818	0.000201279
LAT2	6.06e-09	0.388278	0.761	0.539	0.000157448
ARL6IP5	1.44e-12	0.386768	0.989	0.915	3.74e-08
CTNND1	3.77e-08	0.386578	0.716	0.477	0.000980161
RB1	5.6e-07	0.38616	0.784	0.62	0.01455
PICALM	4.91e-08	0.385291	0.943	0.851	0.00127629
CSF1R	9.28e-08	0.380947	0.943	0.804	0.00241303
CD1E	1.34e-08	0.375756	0.273	0.077	0.000348063
ZNF791	3.33e-08	0.373828	0.466	0.22	0.00086452
GLIPR1	1.43e-08	0.372285	0.943	0.82	0.000372864
C1orf162	1.18e-06	0.370516	0.966	0.883	0.0305662
ALOX5	4.02e-07	0.367334	0.841	0.745	0.0104404
H1FX	9.57e-05	0.366697	0.648	0.473	1
FAM49B	2.88e-10	0.362491	0.932	0.798	7.49e-06
AXL	1.37e-07	0.360307	0.602	0.36	0.00356057
TGFBR1	0.000911287	0.357688	0.648	0.531	1
CMTM3	4.16e-08	0.356634	0.875	0.677	0.00108185
ITM2B	1e-10	0.35614	1	0.996	2.6e-06
PTPRC	1.27e-09	0.354836	1	0.921	3.3e-05
GIMAP7	6.71e-08	0.353129	0.693	0.402	0.00174434
JAML	9.63e-07	0.352679	0.818	0.616	0.025021
LTC4S	2.62e-05	0.348339	0.511	0.313	0.679944
HLA-DMA	4.39e-10	0.344313	1	0.98	1.14e-05
PTAFR	6.39e-07	0.343773	0.886	0.812	0.0166196
TM6SF1	1.15e-06	0.341655	0.739	0.55	0.0300117
MYL12A	5.24e-10	0.340777	0.966	0.931	1.36e-05
RNASE6	4.34e-07	0.337024	0.875	0.626	0.0112737
LPCAT2	1.22e-06	0.336811	0.864	0.719	0.031767
GDI2	1.52e-06	0.3351	0.875	0.802	0.0394375
HLA-DQB1	8.72e-10	0.331258	1	0.994	2.27e-05
GPRIN3	2.49e-08	0.33057	0.92	0.709	0.00064815
DNMT1	0.000108727	0.330116	0.784	0.695	1
CISH	0.000191925	0.329954	0.534	0.384	1
ARPC2	6.23e-10	0.328756	1	0.976	1.62e-05
HTRA1	0.00131774	0.32852	0.386	0.228	1
PLIN3	5.52e-05	0.328449	0.648	0.499	1
UBAC1	5.89e-06	0.327271	0.591	0.386	0.15304
GNAI2	2.44e-10	0.326859	0.977	0.96	6.34e-06
SPI1	3.49e-07	0.324807	0.966	0.905	0.00907394
CAMK1D	3.22e-07	0.324253	0.648	0.404	0.00836963
TBXAS1	1.23e-05	0.324107	0.761	0.63	0.320915
C3AR1	1.05e-06	0.323128	0.932	0.739	0.0273906
2022-03-01	2.58e-06	0.322939	0.83	0.729	0.0670378
HSD17B11	0.000173771	0.322349	0.739	0.628	1
SERPINF1	3.1e-06	0.32201	0.693	0.467	0.080612
ARHGAP9	1.39e-06	0.321988	0.568	0.329	0.0361306
COMMD6	1.16e-05	0.320453	0.92	0.842	0.301346
LRRC8C	1.26e-06	0.319944	0.568	0.345	0.0326712
PLXDC2	6.32e-05	0.31921	0.898	0.867	1
PLA2G16	0.000594552	0.317128	0.545	0.376	1
SORL1	0.000128694	0.316934	0.682	0.55	1
LY86	1.89e-06	0.315788	0.932	0.772	0.0491143
FFAR4	6.64e-07	0.315083	0.455	0.226	0.0172455
RNASET2	8.25e-07	0.312994	0.955	0.887	0.0214465
APAF1	8.47e-07	0.31155	0.511	0.275	0.0220208
CIB1	3.41e-07	0.311549	0.852	0.749	0.00886576
ENPP2	1.63e-05	0.311143	0.534	0.321	0.424215
RAC1	6.85e-07	0.31098	0.989	0.911	0.0178051
TTC1	4.77e-05	0.309583	0.636	0.461	1
GAPDH	1.35e-09	0.308863	0.989	0.984	3.5e-05
PTTG1IP	2.99e-05	0.30715	0.898	0.836	0.775919
APOL4	6.57e-06	0.307026	0.5	0.291	0.170861
NUCKS1	2.61e-05	0.306163	0.886	0.873	0.678829
BROX	0.000422048	0.305778	0.682	0.596	1
SMAD5	6.38e-07	0.303369	0.477	0.25	0.0165814
SLC8A1	0.000589996	0.303097	0.659	0.529	1
PTGS1	2.01e-06	0.301827	0.648	0.446	0.0522289
SEMA4D	5.21e-08	0.301449	0.545	0.275	0.00135532
CLEC4F	3.44e-08	0.301305	0.216	0.05	0.00089449
CD86	4.41e-06	0.301102	0.92	0.824	0.114553
DBNL	8.5e-06	0.300087	0.727	0.57	0.220805
ABI3	4.73e-05	0.299873	0.636	0.436	1
CPED1	1.48e-05	0.299331	0.511	0.297	0.38492
CCND2	0.000170757	0.299283	0.466	0.289	1
PCED1B-AS1	1.47e-05	0.29743	0.659	0.453	0.38131
PLP2	4.87e-05	0.297152	0.761	0.594	1
DHRS7	7.73e-06	0.296661	0.875	0.721	0.200836
DCK	5.22e-07	0.296083	0.602	0.35	0.0135652
APBB1IP	3.16e-07	0.295782	0.909	0.731	0.00822399
P2RY6	5.21e-05	0.294889	0.5	0.301	1
FAM105A	2.49e-06	0.294654	0.727	0.511	0.0647129
HEBP2	0.000860287	0.294275	0.614	0.507	1
LCP2	0.000157792	0.293851	0.807	0.679	1
CFL1	1.51e-07	0.292451	1	0.984	0.00393284
CSF2RA	6.78e-05	0.292011	0.75	0.582	1
RARRES3	0.0364842	0.290476	0.466	0.394	1
SLC4A7	0.000318347	0.289902	0.489	0.311	1
FILIP1L	4.13e-06	0.289446	0.648	0.384	0.107211
LSP1	1.13e-05	0.288549	0.864	0.648	0.294235
HLA-DMB	4.63e-07	0.287804	0.977	0.945	0.012021
LPXN	0.000274486	0.287319	0.716	0.644	1
CLIC1	4.22e-06	0.287077	0.977	0.96	0.109761
MBNL1	1.12e-05	0.286757	0.898	0.859	0.291946
FPR1	1.61e-06	0.2867	0.886	0.644	0.0419666
CPVL	6.07e-05	0.286484	0.886	0.885	1
SYK	0.000100738	0.285879	0.807	0.731	1
STK17A	1.97e-06	0.285872	0.58	0.331	0.0512432
H2AFZ	0.0216538	0.28481	0.727	0.685	1
TMSB4X	1.23e-12	0.28436	1	1	3.19e-08
TUBA1B	0.000350589	0.284159	0.966	0.943	1
GIMAP4	3.62e-06	0.284142	0.852	0.673	0.0939598
ELOVL1	0.00070279	0.283118	0.67	0.558	1
LMO2	2.25e-05	0.281783	0.58	0.364	0.58557
ZFP36L2	3.4e-07	0.280068	0.977	0.903	0.00883477
LPAR5	3.24e-07	0.279499	0.443	0.208	0.00843094
CORO1B	2.19e-05	0.279018	0.75	0.588	0.570046
CAP1	2.03e-07	0.278	0.977	0.933	0.00527596
XRCC5	2.61e-05	0.277508	0.875	0.85	0.678237
SLC1A5	0.00135701	0.27681	0.466	0.325	1
NUDT3	8.97e-07	0.276659	0.602	0.36	0.0233008
RAB14	4.69e-05	0.275929	0.773	0.628	1
FMNL3	0.00316277	0.275918	0.466	0.317	1
CD58	0.00298742	0.275754	0.716	0.638	1
H2AFV	0.00138707	0.27527	0.795	0.754	1
ICAM3	2.22e-07	0.273557	0.409	0.18	0.00577946
YWHAB	2.07e-07	0.272579	0.989	0.925	0.00537764
BRK1	1.2e-05	0.272377	0.932	0.82	0.312317
ABCC4	5.62e-08	0.27186	0.375	0.147	0.00146137
EID1	0.00010192	0.271182	0.852	0.749	1
RHOA	1.83e-08	0.271113	0.966	0.978	0.000475107
WAPL	0.000825168	0.270265	0.705	0.6	1
FIBP	0.000257109	0.270163	0.614	0.446	1
HMGN3	0.00142758	0.269248	0.727	0.612	1
SELENOW	0.000741651	0.268963	0.818	0.741	1
RNF167	0.000738162	0.268547	0.523	0.39	1
CDC123	0.000546594	0.268488	0.557	0.444	1
TWF2	1.02e-05	0.268452	0.841	0.679	0.264606
TNFAIP8L2	0.00335216	0.267692	0.568	0.451	1
CLNS1A	0.00409877	0.266887	0.614	0.511	1
2022-09-07	1.8e-05	0.26635	0.898	0.814	0.468026
CAPZA2	6.7e-05	0.265889	0.886	0.77	1
HLA-DOA	3.27e-05	0.264588	0.818	0.651	0.849373
BIN2	0.00175092	0.264402	0.58	0.489	1
SUMO2	5.71e-05	0.26386	0.92	0.824	1
P2RY13	2.35e-09	0.26358	0.92	0.582	6.11e-05
BAZ2B	0.00957712	0.262989	0.659	0.594	1
TGFBR2	4.07e-05	0.262667	0.761	0.586	1
ERCC1	4.26e-06	0.262307	0.636	0.408	0.110784
SMU1	0.000261959	0.261648	0.591	0.41	1
RTN1	0.000185972	0.261351	0.489	0.303	1
ADD1	0.000537886	0.261039	0.614	0.485	1
RGS18	0.000988709	0.260832	0.455	0.297	1
CAPZB	1.26e-06	0.260816	0.955	0.937	0.0328642
COPS3	0.00180245	0.259919	0.5	0.37	1
ARPC5L	5.16e-06	0.259333	0.557	0.331	0.134142
PPIB	0.00224518	0.258776	0.955	0.931	1
ACTR3	5.8e-05	0.258428	0.955	0.903	1
SNX7	0.000294551	0.256648	0.318	0.166	1
TMEM51	6.9e-05	0.256276	0.602	0.426	1
ZNF618	0.000234506	0.256066	0.295	0.15	1
FLOT1	5.99e-05	0.255457	0.727	0.556	1
VASH1	2.73e-06	0.255327	0.534	0.299	0.070956
WFDC21P	0.0117271	0.254892	0.193	0.105	1
LINC00963	0.00390225	0.254806	0.489	0.386	1
RTF2	0.000214337	0.254422	0.716	0.596	1
LTB	0.000112674	0.253995	0.386	0.218	1
PPA1	3.84e-05	0.253868	0.693	0.495	0.999155
ZNF580	0.00129504	0.253549	0.318	0.184	1
SAMHD1	4.16e-06	0.253032	0.989	0.95	0.108134
APPL1	5.17e-05	0.252944	0.705	0.531	1
SNX17	0.000475631	0.252872	0.648	0.491	1
ETV5	1.65e-06	0.252665	0.489	0.253	0.0427587
HERPUD1	0.000598879	0.252512	0.898	0.84	1
FLOT2	2.19e-05	0.252137	0.5	0.301	0.568966
BLNK	0.00198281	0.25132	0.534	0.41	1
UQCC3	0.000167796	0.251228	0.364	0.208	1
MRPL58	0.00399071	0.250658	0.386	0.269	1
ACE	1.68e-05	-0.25056	0.057	0.269	0.437482
GBP1	0.0189252	-0.250911	0.398	0.523	1
MT-ND4	0.0607404	-0.251465	1	1	1
COLEC12	0.00133792	-0.252778	0.148	0.315	1
DPEP2	8.83e-06	-0.253478	0.08	0.305	0.229595
TMEM30A	0.00403833	-0.253645	0.489	0.624	1
THBS1	0.0394731	-0.254174	0.045	0.117	1
GADD45A	0.060111	-0.254414	0.193	0.271	1
IRF1	0.0150353	-0.254445	0.261	0.406	1
PLPP3	0.000288103	-0.254758	0.239	0.44	1
ADA2	0.00333475	-0.255257	0.591	0.703	1
RPS27L	0.0172401	-0.256749	0.807	0.838	1
IFRD1	0.00128814	-0.259537	0.148	0.321	1
PMAIP1	0.00841315	-0.259633	0.159	0.293	1
STAT1	0.0181757	-0.260056	0.636	0.721	1
HK3	8.48e-06	-0.261141	0.068	0.303	0.220316
TTYH3	0.000480985	-0.261827	0.25	0.432	1
NEU1	5.27e-05	-0.263783	0.375	0.586	1
MT-CO2	0.0540267	-0.265649	1	0.996	1
MSR1	0.0277026	-0.26601	0.739	0.786	1
LAMP2	0.000351318	-0.266601	0.773	0.84	1
GPX4	0.00319314	-0.267106	0.932	0.935	1
HTRA4	3.25e-05	-0.268036	0.011	0.188	0.843997
ARRDC3	0.0833492	-0.26842	0.58	0.644	1
SIGLEC1	0.00562912	-0.269609	0.284	0.436	1
DNASE2	0.0297068	-0.271143	0.591	0.657	1
SLC1A3	0.000664795	-0.271707	0.341	0.535	1
MALAT1	0.00249786	-0.272348	1	1	1
FNDC3B	0.000423405	-0.272948	0.352	0.549	1
MAFB	0.0305201	-0.273788	0.841	0.883	1
CPEB4	5.6e-05	-0.277177	0.239	0.467	1
MGAT1	0.000102806	-0.277996	0.648	0.804	1
FAM198B	7.86e-06	-0.279237	0.159	0.408	0.204309
SAT1	0.00372102	-0.279871	0.966	0.992	1
OTUD1	0.000501128	-0.280523	0.17	0.37	1
ZFAS1	0.0125249	-0.280643	0.636	0.723	1
RMDN3	0.000939486	-0.280702	0.17	0.349	1
PLXND1	8.75e-05	-0.282021	0.261	0.499	1
NOP10	0.00426266	-0.282846	0.818	0.826	1
GADD45G	0.118912	-0.283324	0.284	0.37	1
TIMP1	0.244889	-0.284271	0.773	0.772	1
PHACTR1	0.0359498	-0.284817	0.375	0.469	1
SLC3A2	0.000221949	-0.286898	0.534	0.703	1
IFIT1	0.481331	-0.287194	0.364	0.366	1
TUBA1C	0.0159137	-0.287773	0.614	0.689	1
APLP2	0.00083894	-0.28996	0.955	0.931	1
TUBB4B	2.88e-05	-0.290055	0.261	0.515	0.7497
CYSTM1	0.000228021	-0.290472	0.295	0.501	1
GRINA	0.000532904	-0.290603	0.636	0.745	1
TKT	0.0051355	-0.294624	0.795	0.814	1
CSF1	0.00052772	-0.294812	0.011	0.145	1
MRC1	0.168122	-0.294897	0.727	0.739	1	TAM
SMPDL3A	2.16e-06	-0.296042	0.023	0.248	0.0561249
PLK2	0.0564655	-0.298832	0.17	0.265	1
KCNMA1	4.58e-06	-0.299391	0.057	0.289	0.119113
NR1H3	6.44e-06	-0.300054	0.057	0.281	0.167282
LGALS2	0.00342246	-0.300595	0.148	0.289	1
FGR	0.000721539	-0.300725	0.33	0.517	1
IGLC2	0.95946	-0.301759	0.148	0.156	1
FTLP3	1.48e-05	-0.302088	0.227	0.457	0.383411
SGK1	0.000665436	-0.302578	0.795	0.921	1
TXNRD1	0.0225262	-0.303046	0.477	0.547	1
TPP1	0.000192186	-0.304113	0.716	0.816	1
IDH1	0.0199293	-0.307669	0.477	0.562	1
FNIP2	0.000154313	-0.308836	0.17	0.36	1
RAP2B	0.00057639	-0.309579	0.477	0.63	1
UGCG	0.000366322	-0.310305	0.227	0.418	1
SDC4	2.5e-05	-0.311508	0.114	0.329	0.65022
GPCPD1	0.000382074	-0.311629	0.466	0.64	1
AQP9	4.2e-06	-0.313146	0	0.202	0.109029
SDS	0.000867177	-0.313797	0.136	0.313	1
DNAJA4	0.000118746	-0.31385	0.034	0.202	1
PPP1R15B	0.000498338	-0.314191	0.295	0.481	1
CXCL16	0.000417098	-0.314542	0.875	0.885	1
TGM2	4.39e-05	-0.314611	0.034	0.222	1
LRPAP1	0.000535182	-0.314892	0.705	0.743	1
POR	6.85e-05	-0.316042	0.227	0.45	1
SDC2	0.0019559	-0.317953	0.284	0.444	1
CH25H	0.0128781	-0.318976	0.114	0.232	1
WARS	0.00361778	-0.32001	0.409	0.578	1
IGHG4	0.343023	-0.321518	0.273	0.234	1
ABCA1	0.00326069	-0.324063	0.341	0.463	1
ICAM1	0.00136719	-0.325198	0.432	0.578	1
SRSF7	0.134072	-0.32895	0.795	0.861	1
GSTO1	0.000348792	-0.328978	0.784	0.855	1
SCD	0.000686432	-0.329762	0.193	0.376	1
SOAT1	0.00459778	-0.332708	0.659	0.705	1
FOLR2	0.976579	-0.334536	0.443	0.39	1
CA2	0.000861543	-0.334919	0.114	0.273	1
CLK1	0.00250484	-0.336315	0.5	0.622	1
FCHO2	4.89e-06	-0.337892	0.364	0.638	0.127152
CCRL2	2.53e-05	-0.338133	0.148	0.38	0.656508
IER2	0.342752	-0.338276	0.784	0.796	1
ALAS1	3.2e-06	-0.338407	0.182	0.453	0.0831651
MDM2	0.000673932	-0.339592	0.284	0.481	1
PPDPF	0.0112609	-0.34238	0.761	0.84	1
ATOX1	5.47e-05	-0.342491	0.602	0.739	1
ZFP36	0.00843189	-0.343729	0.898	0.941	1
SLC11A1	0.000214639	-0.344351	0.307	0.533	1
GLMP	0.000337289	-0.349653	0.341	0.499	1
CD163	0.0354405	-0.351714	0.83	0.808	1	M2
JUN	0.0925927	-0.351923	1	0.986	1
SLC15A3	2.72e-05	-0.354407	0.364	0.588	0.705962
RASGEF1B	2.25e-06	-0.358341	0.136	0.406	0.0585857
JUND	0.000274926	-0.360346	0.33	0.533	1
PDK4	0.346955	-0.361715	0.625	0.592	1
ATP2B1-AS1	0.00846231	-0.362272	0.205	0.333	1
IL4I1	5.57e-06	-0.362908	0.102	0.349	0.144688
HCAR3	0.0132361	-0.363726	0.057	0.158	1
PTGER4	0.00551355	-0.364383	0.352	0.499	1
SPARC	0.00390896	-0.366752	0.273	0.404	1
GPR183	0.752373	-0.374266	0.807	0.733	1
SERPING1	0.000803697	-0.374556	0.443	0.602	1
MGLL	7.4e-07	-0.375057	0.034	0.279	0.0192381
DNAJB4	0.00940405	-0.375336	0.239	0.366	1
RSAD2	0.00888015	-0.377049	0.136	0.261	1
EPHX1	0.000427784	-0.379054	0.182	0.366	1
UBC	0.00444212	-0.379651	0.955	0.996	1
IL7R	0.00299082	-0.390499	0.125	0.273	1
CD68	5.43e-06	-0.390939	0.545	0.667	0.141115	M1
ALDH1A1	3.47e-05	-0.404381	0.148	0.368	0.902134
HCAR2	5.77e-05	-0.406722	0.023	0.198	1
TBC1D2	2.74e-08	-0.407944	0.08	0.39	0.000713062
NR4A1	0.00100388	-0.408552	0.273	0.455	1
CTSK	0.00047619	-0.413334	0	0.125	1
CHIT1	0.00236642	-0.413979	0.011	0.117	1
DDIT3	1.1e-05	-0.414084	0.159	0.414	0.286178
MS4A4A	0.00672734	-0.414147	0.591	0.646	1
DMXL2	3.15e-08	-0.414153	0.159	0.465	0.000819587
PHLDA1	5.76e-05	-0.417537	0.182	0.4	1
HLA-A	1.36e-08	-0.418177	0.977	0.978	0.0003526
ACSL1	3.4e-06	-0.419287	0.25	0.489	0.0883728
PPARG	8.47e-07	-0.420114	0.068	0.323	0.0220038
HSPE1	0.00193268	-0.421652	0.739	0.851	1
TIPARP	1.31e-06	-0.422039	0.227	0.475	0.0339333
IFI6	0.503281	-0.424698	0.875	0.844	1
NFKBIA	0.0687922	-0.426413	0.989	0.966	1
IER3	0.851588	-0.433082	0.807	0.727	1
LYZ	0.0579223	-0.433249	0.989	0.984	1
RHOB	2.24e-05	-0.433433	0.443	0.699	0.581727
TNFAIP2	1.23e-06	-0.438754	0.25	0.517	0.0318786
CTSA	9.27e-06	-0.443293	0.682	0.784	0.240919
IGLC3	0.0550871	-0.445083	0.102	0.051	1
CCNL1	0.000868176	-0.445205	0.682	0.79	1
ADM	5.18e-06	-0.446049	0.091	0.349	0.13467
TIMP2	3.48e-06	-0.447036	0.477	0.655	0.0903618
ISG15	0.191739	-0.448514	0.67	0.632	1
TSPAN4	5e-07	-0.453626	0.227	0.491	0.013003
DUSP2	0.000346084	-0.456355	0.136	0.321	1
CCL2	0.40461	-0.45832	0.386	0.404	1
ZFAND5	5.8e-07	-0.458472	0.716	0.85	0.0150828
CTSZ	0.00166065	-0.458815	0.92	0.939	1
IFIT3	0.0336678	-0.463786	0.432	0.515	1
NAMPT	7.92e-07	-0.467358	0.33	0.598	0.0205814
VAT1	8.65e-07	-0.469173	0.307	0.537	0.0224708
SDCBP	3.3e-09	-0.472014	0.864	0.913	8.58e-05
TRIB1	4.23e-06	-0.473002	0.261	0.523	0.110003
HEXB	1.41e-07	-0.478799	0.818	0.879	0.00366776
ITGAX	2.07e-07	-0.480533	0.295	0.564	0.00539143
CFD	0.000799362	-0.480534	0.341	0.487	1
UBB	8.21e-06	-0.48172	1	0.992	0.213285
LAMP1	4.9e-08	-0.482395	0.5	0.717	0.00127425
KLF2	0.0011164	-0.483698	0.216	0.366	1
TNF	0.323034	-0.484107	0.307	0.36	1	M1
CD36	0.000137724	-0.484408	0.125	0.311	1
DNAJA1	0.000469391	-0.48519	0.739	0.85	1
G0S2	0.0189445	-0.486585	0.091	0.186	1
EMP1	1.99e-05	-0.486679	0.17	0.402	0.518005
CCL8	0.00586981	-0.488575	0.011	0.103	1
MCEMP1	0.00154053	-0.488991	0.057	0.192	1
TWISTNB	0.0342599	-0.489767	0.273	0.404	1
TRA2B	0.0027936	-0.491127	0.602	0.733	1
SLAMF7	0.000612252	-0.493781	0.068	0.224	1
CDKN1A	0.000404766	-0.494012	0.489	0.648	1
DUSP1	2.66e-05	-0.498263	0.92	0.968	0.690828
CPM	4.51e-05	-0.505056	0.466	0.622	1
EGR2	0.034487	-0.507027	0.375	0.477	1
CREG1	3.07e-05	-0.508148	0.727	0.826	0.798542
RIPK2	8.65e-08	-0.513413	0.205	0.509	0.00224916
BLVRB	4.3e-08	-0.518349	0.386	0.663	0.00111704
FUCA1	0.0088844	-0.528025	0.466	0.57	1
EGR1	0.0104232	-0.530067	0.67	0.78	1
PLTP	1.39e-05	-0.535416	0.193	0.416	0.362079
BRI3	3.21e-05	-0.535511	0.818	0.883	0.83378
IGHG3	0.959838	-0.539401	0.17	0.176	1
SQSTM1	8.23e-07	-0.541437	0.761	0.838	0.0213946
GDF15	7.34e-05	-0.54281	0.034	0.21	1
NPL	8.42e-07	-0.543729	0.25	0.523	0.0218757
HSP90AB1	0.000837319	-0.550563	1	0.99	1
ASAH1	2.35e-07	-0.551319	0.909	0.879	0.00610421
ZFAND2A	0.0033915	-0.556523	0.17	0.319	1
FCN1	0.0347556	-0.558783	0.159	0.255	1
GCHFR	3.47e-05	-0.559873	0.193	0.408	0.901846
HSPD1	0.00901441	-0.56027	0.773	0.842	1
NR4A2	0.000509984	-0.564673	0.136	0.305	1
TFRC	2.48e-06	-0.565367	0.136	0.376	0.0645304
RGS2	0.00190522	-0.568382	0.67	0.758	1
PLAUR	0.000223682	-0.572565	0.602	0.677	1
HBEGF	0.000521758	-0.573185	0.216	0.39	1
IGHG1	0.543273	-0.57651	0.455	0.418	1
FOS	1.1e-05	-0.581662	0.977	0.982	0.286988
ARL4A	1.94e-08	-0.588402	0.182	0.485	0.000505435
GADD45B	5.99e-10	-0.610782	0.614	0.865	1.56e-05
PLEK	3.2e-06	-0.619514	0.682	0.848	0.0830865
MT2A	0.00189324	-0.619629	0.67	0.76	1
SOD2	6.25e-06	-0.62033	0.398	0.614	0.162357
KLF4	5.01e-08	-0.621921	0.398	0.687	0.00130191
C5AR1	4.53e-09	-0.622005	0.284	0.616	0.000117823
HSPA6	0.849225	-0.62212	0.295	0.287	1
CTSS	8.02e-10	-0.626957	0.989	0.996	2.08e-05
IFIT2	0.0102958	-0.645252	0.352	0.475	1
IL1B	0.345384	-0.651768	0.455	0.475	1	TAM
C15orf48	0.000107217	-0.659502	0.193	0.41	1
PSAP	4.32e-09	-0.663137	1	1	0.000112196
SMIM25	1.14e-10	-0.666068	0.102	0.469	2.97e-06
LPL	6.03e-05	-0.667338	0.068	0.259	1
PPP1R15A	0.000276237	-0.677997	0.557	0.737	1
HSPB1	8.54e-05	-0.681946	0.83	0.891	1
GM2A	1.89e-05	-0.684406	0.534	0.659	0.491198
BAG3	0.00171872	-0.69039	0.148	0.295	1
FABP5	1.77e-06	-0.694429	0.364	0.6	0.0460917
VCAN	0.00810157	-0.717145	0.148	0.273	1
RNASE1	0.00296513	-0.72416	0.057	0.178	1
NFKBIZ	4.62e-06	-0.726624	0.216	0.469	0.120177
KLF6	0.000562478	-0.728586	0.92	0.943	1
FBP1	0.000113949	-0.744432	0.511	0.628	1
MARCO	8.26e-07	-0.758637	0.011	0.246	0.0214584
GLUL	1.45e-11	-0.762043	0.898	0.945	3.76e-07
CTSB	6.91e-10	-0.774317	1	0.99	1.79e-05
TNFAIP3	0.00252904	-0.779028	0.534	0.632	1
IER5	1.49e-05	-0.779329	0.443	0.663	0.388472
FOSB	3.28e-06	-0.789805	0.398	0.636	0.0852395
RGCC	1.31e-06	-0.790283	0.216	0.489	0.0340698
LTA4H	7.86e-10	-0.798156	0.42	0.683	2.04e-05
LIPA	6.88e-07	-0.80437	0.636	0.75	0.0178825
IL1RN	0.00128358	-0.816463	0.17	0.329	1
PLA2G7	8.29e-10	-0.821358	0.114	0.457	2.15e-05
S100A8	0.00010738	-0.837302	0.159	0.356	1
CHI3L1	0.00409422	-0.843637	0.091	0.218	1
CXCL3	0.00114738	-0.847574	0.102	0.251	1	M1
PLD3	3.81e-08	-0.865842	0.591	0.756	0.000990505
CD52	0.0020055	-0.867193	0.602	0.711	1
HSPA1B	1.15e-05	-0.875755	0.614	0.784	0.298088
MMP9	0.0173796	-0.913371	0.125	0.23	1
LGALS3	9.38e-10	-0.91721	0.773	0.873	2.44e-05
HSP90AA1	9.68e-07	-0.939655	0.977	0.994	0.0251654
NUPR1	1.01e-06	-0.955694	0.25	0.485	0.0263377
TXN	5.18e-08	-0.967362	0.761	0.826	0.00134751
FTH1	6.66e-21	-1.00564	1	1	1.73e-16
FTL	6.46e-14	-1.02623	1	1	1.68e-09
CYP27A1	5.29e-13	-1.03482	0.068	0.483	1.37e-08
CCL3L1	0.00298495	-1.0484	0.432	0.572	1
HMOX1	0.000391803	-1.05006	0.614	0.735	1
CCL4	2.06e-05	-1.06225	0.5	0.715	0.535057
CSTB	1.03e-06	-1.07855	0.989	0.933	0.0268819
BCL2A1	2.19e-11	-1.10586	0.33	0.673	5.7e-07
CXCL10	0.642304	-1.11137	0.114	0.127	1
HSPA1A	3.2e-07	-1.12489	0.818	0.95	0.00830483
CD83	4.48e-11	-1.15146	0.295	0.646	1.16e-06
CCL4L2	0.0085212	-1.16654	0.477	0.584	1
SPP1	0.311192	-1.18093	0.511	0.509	1
ACP5	7.16e-08	-1.18745	0.455	0.644	0.00186145
CXCL2	2.81e-06	-1.19077	0.17	0.402	0.0729236
LGMN	4.78e-06	-1.20773	0.375	0.554	0.124355
CCL13	0.000900906	-1.21619	0.114	0.263	1
S100A9	1.36e-09	-1.21901	0.216	0.529	3.53e-05
DNAJB1	8.53e-06	-1.21968	0.693	0.832	0.221639
CTSD	5.86e-10	-1.23525	0.864	0.909	1.52e-05
ATF3	1.71e-10	-1.25705	0.273	0.628	4.43e-06
SELENOP	0.00179398	-1.26107	0.148	0.299	1
CCL3	3.23e-07	-1.26686	0.545	0.764	0.00840508
APOE	8.86e-08	-1.27693	0.693	0.796	0.00230326
PLIN2	1.55e-11	-1.30684	0.693	0.859	4.02e-07
CXCL8	1.15e-06	-1.35402	0.318	0.578	0.029966
APOC1	4.87e-08	-1.36041	0.67	0.788	0.00126657
HSPH1	4.38e-08	-1.41404	0.534	0.747	0.00113838
CTSL	9.83e-12	-1.60051	0.534	0.733	2.55e-07
GPNMB	3.18e-11	-1.63386	0.557	0.729	8.25e-07
CCL18	0.000319495	-1.97902	0.182	0.345	1

## Sheet: P21120201.clusterMacrophages5_d
gene_id	p_val	avg_logFC	pct.1	pct.2	p_val_adj
SELENOP	2.28e-22	2.05519	0.701	0.222	5.94e-18
SLC40A1	4.95e-20	1.08766	0.791	0.335	1.29e-15
FOLR2	1e-15	1.07678	0.746	0.354	2.61e-11
RNASE1	1.08e-06	1.04628	0.343	0.137	0.0280942
STAB1	2.26e-21	0.897547	0.821	0.342	5.87e-17
PDK4	5.57e-11	0.853933	0.881	0.561	1.45e-06
C1QB	1.96e-16	0.816866	1	0.863	5.08e-12
C1QC	1.02e-17	0.802092	1	0.863	2.65e-13
PLTP	3.96e-11	0.780759	0.672	0.346	1.03e-06
GAL3ST4	3.15e-19	0.754161	0.672	0.213	8.19e-15
CCL13	2.22e-05	0.737789	0.433	0.217	0.577009
A2M	1.96e-12	0.713565	0.97	0.84	5.08e-08
GPR34	7.5e-10	0.684275	0.836	0.644	1.95e-05
C1QA	2.15e-14	0.660822	1	0.886	5.58e-10
MRC1	1.4e-06	0.631613	0.881	0.719	0.036319
F13A1	7.19e-06	0.629629	0.791	0.576	0.186758
HLA-DRB5	9.76e-09	0.620858	0.851	0.692	0.000253687
CTSC	1.16e-11	0.619698	1	0.935	3e-07
MSR1	1.87e-10	0.60765	0.94	0.759	4.86e-06
NRP1	1.52e-06	0.602586	0.672	0.471	0.0393767
SLCO2B1	4.48e-11	0.58592	0.866	0.646	1.16e-06
CD14	1.22e-06	0.566894	0.97	0.892	0.0317407
APOE	0.000116903	0.545063	0.791	0.779	1
MAF	4.05e-07	0.539509	0.672	0.422	0.0105368
FCGR2A	2.05e-08	0.535071	0.97	0.895	0.000532371
HLA-DQA1	2.27e-09	0.533051	1	0.985	5.9e-05
GYPC	0.000135371	0.524021	0.433	0.257	1
ADAP2	1.02e-08	0.517893	0.836	0.633	0.000265151
MS4A7	7.21e-11	0.515767	0.985	0.895	1.87e-06
MARCKS	1.53e-10	0.515275	0.97	0.844	3.97e-06
GGTA1P	3.77e-08	0.507286	0.806	0.557	0.000979285
IGSF21	3.81e-07	0.50078	0.284	0.087	0.00989897
MERTK	3.91e-09	0.497974	0.552	0.251	0.000101568
SPRED1	0.00150189	0.490355	0.627	0.57	1
C3AR1	1.48e-09	0.488635	0.925	0.747	3.86e-05
PLD3	1.35e-10	0.488467	0.94	0.705	3.51e-06
SNX6	2.97e-06	0.479346	0.791	0.747	0.0772443
MAFB	5.82e-08	0.467303	0.925	0.871	0.00151313
MS4A4A	1.35e-07	0.466878	0.851	0.61	0.00351802
PMP22	0.00131405	0.457722	0.657	0.515	1
TMEM176B	1.24e-06	0.454536	0.955	0.749	0.0321996
CD84	1.61e-07	0.449895	0.881	0.692	0.00418037
CD74	4.2e-13	0.446318	1	1	1.09e-08
ITPR2	2.06e-05	0.442848	0.746	0.584	0.535652
GPR155	4.85e-08	0.44231	0.418	0.163	0.00126073
ITGAV	1.77e-07	0.441589	0.597	0.356	0.00461293
HLA-DPA1	1.53e-09	0.437501	1	1	3.97e-05
IFI44L	4.14e-06	0.436734	0.731	0.502	0.107479
HLA-DRB1	2.44e-11	0.431103	1	1	6.35e-07
CD163	3.41e-06	0.427643	0.91	0.798	0.0886613
ITM2B	1.22e-09	0.426475	1	0.996	3.17e-05
ADORA3	2.98e-06	0.425394	0.552	0.319	0.0775627
ME1	1.31e-08	0.424009	0.433	0.162	0.000340813
ABCA1	3.22e-05	0.422442	0.612	0.424	0.835782
FYB1	3.99e-07	0.421647	0.97	0.865	0.0103653
FCHO2	4.19e-08	0.420947	0.866	0.563	0.00108829
GIMAP8	9.87e-06	0.418751	0.493	0.266	0.256468
ANTXR2	1.91e-07	0.404393	0.448	0.2	0.00497251
CXCL12	1.46e-05	0.395233	0.164	0.042	0.379342
LPAR6	5.14e-07	0.39506	0.955	0.785	0.013349
TNFRSF11A	1.04e-09	0.395018	0.403	0.127	2.7e-05
HGF	3.75e-08	0.394792	0.433	0.167	0.000975204
DAB2	4.62e-05	0.394263	0.881	0.785	1
MS4A6A	2.17e-06	0.386348	1	0.857	0.0563164
HLA-DQB1	8.4e-10	0.385455	1	0.994	2.18e-05
CSF1R	1.23e-07	0.384541	0.925	0.812	0.00320665
SLC4A7	1.05e-05	0.379335	0.537	0.312	0.2734
ADAM9	0.000896752	0.377585	0.657	0.546	1
IL2RA	1.78e-06	0.373838	0.343	0.125	0.0461744
ITSN1	3.12e-07	0.371572	0.403	0.169	0.00809794
HLA-DPB1	1.75e-07	0.370673	1	0.99	0.00454674
GIMAP4	5.22e-06	0.370573	0.896	0.675	0.135785
HLA-DOA	7.21e-05	0.363794	0.821	0.658	1
CH25H	0.157636	0.363655	0.269	0.207	1
ARHGAP18	2.35e-06	0.360094	0.925	0.861	0.0609564
MMP14	3.35e-05	0.359179	0.716	0.51	0.871426
CMKLR1	4.96e-08	0.357625	0.582	0.27	0.00128796
ENG	0.00222789	0.354987	0.701	0.567	1
SDCCAG8	0.00099276	0.35219	0.701	0.576	1
SLAMF8	0.00091975	0.351252	0.776	0.618	1
SYNGR2	0.000271681	0.350922	0.97	0.848	1
CREBL2	3.22e-05	0.34932	0.672	0.506	0.836224
LAPTM4A	2.97e-06	0.347891	0.925	0.844	0.0770829
DOCK1	0.000558521	0.347714	0.358	0.198	1
CPM	0.000120756	0.347654	0.776	0.576	1
LGMN	6.05e-07	0.344185	0.791	0.494	0.0157363
DRAM2	5.07e-05	0.338959	0.806	0.625	1
HLA-E	3.18e-09	0.337197	1	0.979	8.27e-05
SESN1	0.00163438	0.335911	0.537	0.397	1
FCGR3A	1.35e-05	0.335629	0.955	0.77	0.350266
LMBRD1	0.000472031	0.334479	0.642	0.508	1
OLFML2B	1.28e-08	0.333576	0.507	0.202	0.000332678
SELPLG	0.000237746	0.327998	0.597	0.432	1
ADAM28	0.00313576	0.325825	0.493	0.352	1
TSPAN15	3.16e-08	0.325077	0.403	0.15	0.00082117
ZNF331	0.00693469	0.324135	0.433	0.298	1
AP1B1	4.79e-05	0.323884	0.672	0.452	1
IFITM2	0.0011693	0.323267	0.896	0.776	1
ST8SIA4	7.1e-05	0.322661	0.582	0.378	1
LACC1	9.51e-06	0.321856	0.388	0.175	0.247061
TMEM37	5.43e-05	0.3195	0.358	0.171	1
ANKH	0.000200466	0.31885	0.493	0.285	1
SCARB2	0.000581815	0.317501	0.776	0.641	1
CCDC170	0.00023073	0.315068	0.448	0.259	1
HLA-DRA	8.85e-07	0.313448	1	1	0.0229997
TNFRSF1A	0.00260792	0.312577	0.687	0.582	1
CD302	6.76e-05	0.311263	0.806	0.622	1
AKR1B1	0.00141586	0.310978	0.791	0.698	1
ABI1	0.000284934	0.310977	0.672	0.508	1
EBI3	1.95e-07	0.310116	0.239	0.059	0.00505565
ARL4C	6.7e-05	0.30965	0.403	0.207	1
FPR3	0.000110272	0.308312	0.851	0.679	1
IDH1	7.76e-05	0.307945	0.716	0.529	1
ENPP2	0.00228668	0.306267	0.493	0.335	1
GNPTAB	6.65e-05	0.303517	0.746	0.629	1
PILRA	0.000121756	0.301935	0.851	0.747	1
HLA-DMA	3.53e-07	0.301782	1	0.981	0.00916888
TMEM176A	0.00111825	0.301122	0.836	0.66	1
ARRDC2	0.00329351	0.300669	0.343	0.209	1
SIGLEC1	0.00127978	0.300667	0.567	0.394	1
GCNT1	0.000850297	0.300563	0.358	0.209	1
IGFBP4	8.23e-05	0.300499	0.373	0.184	1
USP9X	9.36e-05	0.300449	0.642	0.449	1
APPL1	0.000624516	0.299735	0.716	0.536	1
SAMSN1	0.00517473	0.298695	0.627	0.477	1
ASPH	0.0508424	0.297868	0.582	0.54	1
RB1	9.78e-05	0.294595	0.821	0.622	1
MPEG1	0.00190778	0.292607	0.672	0.565	1
CD81	0.0066354	0.290341	0.866	0.84	1
IGF1	4.67e-07	0.290022	0.224	0.055	0.0121418
TNFAIP2	0.0363007	0.286583	0.567	0.466	1
AP2A2	0.000244685	0.285831	0.478	0.295	1
TNFSF13B	0.00181846	0.285017	0.791	0.667	1
SWAP70	8.37e-05	0.284951	0.761	0.605	1
CD209	2.62e-06	0.283611	0.269	0.086	0.0681534
TRAM1	0.00100792	0.283005	0.851	0.806	1
BMP2K	0.000787013	0.282952	0.746	0.605	1
ABCA6	0.00127675	0.282537	0.239	0.11	1
PRNP	0.000283833	0.281599	0.761	0.561	1
CEBPD	0.00126775	0.281146	0.896	0.873	1
NCKAP1L	0.000118169	0.280224	0.761	0.62	1
RNASE6	0.000654515	0.278737	0.836	0.641	1
HLA-DMB	5.66e-05	0.277273	1	0.943	1
GIMAP2	0.00633628	0.276804	0.507	0.38	1
FAM105A	0.000315056	0.275634	0.701	0.523	1
IFI16	0.00136014	0.275004	0.925	0.865	1
FCHSD2	0.190361	0.274896	0.433	0.392	1
ISCU	0.00137442	0.274749	0.806	0.7	1
IFIT2	0.0186923	0.274026	0.567	0.443	1
FCGRT	2.16e-05	0.273802	0.985	0.92	0.560806
CD163L1	4.83e-12	0.273545	0.239	0.034	1.25e-07
ARRDC3	0.0725915	0.273174	0.687	0.627	1
MEF2C	0.0142488	0.272983	0.836	0.639	1
HCLS1	4.21e-05	0.272237	0.896	0.795	1
RPRD2	0.000165254	0.271214	0.403	0.219	1
TXNIP	0.000195564	0.270122	1	0.983	1
VPS36	0.0020663	0.269719	0.582	0.439	1
PPP4R3B	0.00948692	0.267856	0.582	0.466	1
EPSTI1	0.0077598	0.267346	0.731	0.601	1
EPHB2	0.0188912	0.266805	0.224	0.133	1
TLR7	0.0035029	0.266316	0.567	0.418	1
SNX9	0.0133655	0.265299	0.537	0.401	1
CPED1	5.84e-07	0.264403	0.597	0.295	0.0151851
TPCN1	0.00836567	0.262354	0.373	0.251	1
LY86	0.00206847	0.261597	0.851	0.789	1
SLC1A3	0.00628385	0.261072	0.627	0.49	1
C6orf62	0.0019971	0.260323	0.746	0.591	1
LTC4S	0.00197929	0.259761	0.507	0.321	1
ZSWIM6	0.00838603	0.259446	0.328	0.202	1
ID3	0.0897258	0.259098	0.552	0.517	1
DDIT4	0.0442482	0.258714	0.567	0.479	1
TFEC	0.000615968	0.258579	0.791	0.692	1
TBXAS1	0.000112679	0.25618	0.836	0.625	1
SESN3	0.173318	0.256165	0.358	0.302	1
EVA1B	0.0681691	0.256126	0.373	0.298	1
VAMP3	0.0254274	0.255497	0.672	0.587	1
ATP2B1	0.00359094	0.255301	0.716	0.612	1
GAA	0.000195528	0.255117	0.746	0.584	1
RASD1	0.677995	0.254819	0.104	0.131	1
PDGFC	4.97e-07	0.253031	0.463	0.202	0.0129101
CAPZB	7.67e-05	0.252068	0.97	0.935	1
MRPL18	0.0052455	-0.250358	0.433	0.595	1
MNDA	0.0185443	-0.250649	0.881	0.907	1
CYCS	0.002493	-0.251708	0.567	0.715	1
LDHA	0.00841718	-0.25253	0.657	0.787	1
TIMM8B	0.00158571	-0.253644	0.328	0.532	1
RHOC	0.0193879	-0.253878	0.493	0.656	1
IL17RA	0.00948793	-0.254132	0.433	0.578	1
RAB1A	0.000564513	-0.254169	0.522	0.745	1
HTRA4	0.00052214	-0.254756	0.015	0.181	1
IER2	0.039577	-0.254984	0.731	0.802	1
GPAT3	0.000740464	-0.255116	0.104	0.306	1
RPL35A	0.000191212	-0.255496	0.97	0.992	1
HCST	0.0487275	-0.255684	0.642	0.762	1
EMP1	0.163036	-0.255987	0.313	0.375	1
SCD	0.0325953	-0.257447	0.239	0.363	1
HSP90AB1	0.00979652	-0.257901	0.97	0.994	1
RAN	0.000972446	-0.259173	0.746	0.842	1
GADD45B	0.326178	-0.259444	0.821	0.829	1
HSPE1	0.000755828	-0.259858	0.687	0.854	1
SPN	0.00211629	-0.259995	0.254	0.466	1
TMEM138	0.000916755	-0.261493	0.149	0.348	1
RPS18	0.000134441	-0.261844	0.985	0.996	1
GM2A	0.23846	-0.262057	0.597	0.646	1
TUBB4B	0.00137227	-0.262622	0.328	0.496	1
ARL4A	0.0343263	-0.263779	0.328	0.454	1
OGFRL1	0.0478464	-0.263791	0.687	0.76	1
AQP9	0.00103831	-0.264435	0.03	0.19	1
ACOT13	0.000935959	-0.264766	0.224	0.424	1
TXNDC17	0.000854527	-0.265188	0.418	0.631	1
SPARC	0.334805	-0.265989	0.373	0.386	1
ZFAND2A	0.538881	-0.266152	0.269	0.3	1
TMA7	0.000256069	-0.2663	0.672	0.871	1
CCT5	0.000319096	-0.266812	0.493	0.747	1
GLIPR2	0.00317749	-0.2671	0.328	0.487	1
PLD4	0.0466987	-0.268439	0.328	0.449	1
SOX4	0.118243	-0.268914	0.134	0.207	1
ZFAND5	0.0057715	-0.269432	0.746	0.84	1
TPI1	0.00103195	-0.269793	0.866	0.933	1
MAPK1IP1L	8.13e-05	-0.270327	0.328	0.568	1
KIAA0930	0.00033189	-0.271423	0.194	0.416	1
TRA2B	0.270715	-0.272334	0.672	0.719	1
ELOC	0.00144665	-0.272841	0.463	0.675	1
ACTB	0.000472252	-0.273338	1	0.998	1
SNRPF	0.000819977	-0.274966	0.269	0.479	1
ACSL1	0.0369394	-0.27723	0.373	0.464	1
MGST1	0.00556679	-0.277731	0.284	0.445	1
ELOB	0.000992467	-0.277817	0.746	0.856	1
NR4A3	0.00749309	-0.280133	0.06	0.184	1
NDUFB9	0.0102778	-0.280189	0.642	0.74	1
AREG	0.424844	-0.280584	0.104	0.137	1
CORO1C	0.000912668	-0.281339	0.522	0.671	1
SH3BGRL3	0.00202839	-0.281784	0.985	0.985	1
TIMM17A	0.000393237	-0.281887	0.284	0.525	1
NCF1C	0.0130517	-0.282952	0.239	0.395	1
COX5A	0.00141097	-0.283171	0.687	0.831	1
CCL17	0.505042	-0.283648	0.209	0.179	1
TIMP1	0.0779996	-0.283701	0.716	0.779	1
C3	0.542567	-0.28436	0.627	0.605	1
RAC2	0.000309979	-0.284501	0.388	0.637	1
VASP	0.000162341	-0.285609	0.478	0.715	1
TMSB10	4.72e-07	-0.286676	1	1	0.0122561
CLEC10A	0.0142838	-0.291239	0.254	0.424	1
NDUFA2	0.00108071	-0.292403	0.597	0.728	1
PIM1	0.00199757	-0.292925	0.149	0.329	1
PHACTR1	0.00602395	-0.29582	0.284	0.477	1
CSF1	0.00358481	-0.2962	0.015	0.139	1
RPL10A	0.000476661	-0.296747	0.925	0.918	1
NOP10	0.0014076	-0.296806	0.701	0.84	1
CLEC12A	0.00159826	-0.298255	0.194	0.397	1
NCF2	0.00931346	-0.298371	0.657	0.722	1
SEC61B	0.000205255	-0.298684	0.612	0.795	1
FTL	0.755378	-0.298951	1	1	1
HCAR2	0.0108108	-0.299755	0.06	0.186	1
GAPT	0.0275792	-0.300842	0.299	0.426	1
CD55	0.0005252	-0.301983	0.269	0.489	1
APRT	1e-05	-0.302002	0.597	0.814	0.260129
S100B	0.780816	-0.302378	0.194	0.196	1
DCXR	0.0122826	-0.303181	0.358	0.508	1
PRKCD	2.09e-05	-0.303211	0.284	0.565	0.542046
JUN	0.0469142	-0.305455	0.955	0.992	1
SRSF7	0.0403782	-0.30926	0.746	0.865	1
IFI6	0.491745	-0.309337	0.851	0.848	1
SIRPB1	0.000147215	-0.313328	0.164	0.39	1
DNAJA1	0.000615935	-0.315489	0.746	0.844	1
COTL1	0.0014587	-0.315793	0.806	0.918	1
RGS16	0.0316713	-0.316081	0.104	0.213	1
PLK2	0.112667	-0.318033	0.179	0.26	1
GPNMB	0.409072	-0.319056	0.806	0.69	1
TRIB1	0.0112624	-0.321044	0.358	0.5	1
HLA-DQA2	0.0010265	-0.321339	0.104	0.3	1
TAF9	5.63e-05	-0.321913	0.299	0.534	1
LPL	0.551376	-0.323022	0.209	0.234	1
CLK1	0.000259027	-0.323364	0.403	0.629	1
ENO1	1.14e-05	-0.324185	0.836	0.947	0.29503
TUBA1B	0.000283489	-0.325894	0.896	0.952	1
CSTA	7.02e-05	-0.326049	0.448	0.683	1
KLF10	0.0020922	-0.327398	0.254	0.443	1
IFIT1	0.354316	-0.327448	0.328	0.371	1
BCAS2	0.0011218	-0.334151	0.254	0.449	1
HSPA1A	0.104231	-0.334162	0.94	0.93	1
CKLF	0.0168541	-0.33529	0.597	0.692	1
MYADM	0.000661205	-0.337274	0.373	0.601	1
BAG3	0.182339	-0.340081	0.209	0.281	1
DDIT3	0.0123609	-0.340179	0.239	0.394	1
HSPA8	0.000140287	-0.340339	0.866	0.977	1
CCL4L2	0.387931	-0.340666	0.537	0.572	1
PPP1R15A	0.0339541	-0.34135	0.612	0.722	1
LSP1	0.000725322	-0.341516	0.507	0.702	1
NR4A1	0.12066	-0.341541	0.343	0.439	1
SQOR	2.97e-05	-0.341577	0.493	0.709	0.770883
IER5	0.119011	-0.34239	0.537	0.643	1
CAPG	0.000925323	-0.345623	0.851	0.958	1
RPL39	4.69e-06	-0.346417	0.91	0.975	0.121767
BLOC1S2	1.45e-05	-0.34916	0.269	0.549	0.375923
TAGAP	0.00186902	-0.350313	0.254	0.435	1
EMP3	0.0109682	-0.351289	0.806	0.924	1
TWISTNB	0.0440418	-0.351387	0.284	0.397	1
BHLHE41	8.9e-07	-0.352421	0.239	0.565	0.023119
PPDPF	0.00308072	-0.354144	0.776	0.835	1
FOSB	0.0573895	-0.3543	0.522	0.61	1
GLRX	0.00369489	-0.355453	0.716	0.816	1
IFI27	0.43168	-0.360131	0.328	0.386	1
FTH1	0.0658515	-0.361011	1	1	1
TXNRD1	0.00337541	-0.364738	0.403	0.553	1
SERPINA1	0.000518157	-0.364799	0.851	0.943	1
ANXA1	0.0408382	-0.364991	0.955	0.943	1
BRI3	0.00963734	-0.366408	0.821	0.88	1
VIM	2.67e-05	-0.37137	0.985	0.996	0.693236
OTUD1	0.0345714	-0.372625	0.239	0.354	1
DUSP1	0.00336734	-0.373836	0.955	0.962	1
PLAUR	0.00438807	-0.374663	0.507	0.686	1
CYTIP	2.52e-05	-0.375901	0.209	0.506	0.653947
PKM	1.52e-06	-0.376103	0.776	0.954	0.039536
TFRC	0.00673904	-0.377151	0.194	0.359	1
TSPO	3.61e-06	-0.377541	0.821	0.956	0.0936925
EGR1	0.00918619	-0.378953	0.627	0.781	1
WARS	0.000221234	-0.382549	0.343	0.58	1
CCR2	0.000165569	-0.384745	0.09	0.316	1	TAM
FABP5	0.0066928	-0.386683	0.418	0.584	1
ANXA2	1.51e-05	-0.388771	0.955	0.979	0.391498
FPR1	0.000567259	-0.389027	0.507	0.702	1
PPARG	4.71e-05	-0.389306	0.075	0.312	1
ADM	0.0024374	-0.389386	0.149	0.331	1
PPA1	0.000238202	-0.390738	0.328	0.549	1
CDKN1A	0.0111316	-0.392128	0.522	0.637	1
EGR2	0.0224417	-0.396585	0.343	0.477	1
CTSL	0.119545	-0.400265	0.821	0.688	1
IGLC2	0.705479	-0.403691	0.134	0.158	1
SOD2	0.00281126	-0.40446	0.418	0.603	1
NR4A2	0.00971756	-0.408765	0.149	0.297	1
CHIT1	0.00364588	-0.411089	0	0.114	1
CCL4	0.653714	-0.411145	0.746	0.675	1
HBEGF	0.00300279	-0.414905	0.194	0.386	1
HSPA1B	0.00683188	-0.42308	0.627	0.776	1
P2RY13	0.259112	-0.42335	0.627	0.633	1
PSMA7	5.67e-07	-0.42545	0.91	0.968	0.0147391
GBP1	0.0549473	-0.427996	0.418	0.515	1
IGHG4	0.0718187	-0.428979	0.149	0.251	1
HSP90AA1	0.0295571	-0.431564	0.985	0.992	1
ALOX5AP	0.00745161	-0.435248	0.836	0.875	1
AP1S2	1.33e-05	-0.438283	0.493	0.719	0.346769
BASP1	1.95e-06	-0.439068	0.149	0.449	0.0506163
TALDO1	2.23e-05	-0.44696	0.731	0.829	0.578353
IGHG1	0.254496	-0.44864	0.478	0.416	1
LGALS3	0.330289	-0.451551	0.896	0.854	1
HSPD1	0.0291678	-0.454011	0.761	0.84	1
HMOX1	0.134415	-0.454718	0.791	0.707	1
SLAMF7	0.00614284	-0.458191	0.075	0.217	1
FLNA	7.4e-06	-0.463547	0.388	0.625	0.192334
GCHFR	0.00303516	-0.466199	0.224	0.395	1
FGR	9.58e-06	-0.475878	0.254	0.519	0.248954
CCL20	0.0213251	-0.477867	0.015	0.101	1
CD69	0.00446355	-0.478224	0.269	0.437	1
SLC11A1	0.000387465	-0.478462	0.313	0.523	1
TNF	0.0397581	-0.478787	0.239	0.367	1
IER3	0.138615	-0.480308	0.701	0.743	1
CLDN1	0.0270223	-0.482999	0.313	0.437	1
DUSP2	0.00648648	-0.484945	0.164	0.31	1
SNX10	1.37e-05	-0.488652	0.612	0.812	0.354983
DNAJB1	0.0183139	-0.491006	0.761	0.817	1
HCAR3	0.00164487	-0.491522	0.015	0.16	1
LYZ	0.0679933	-0.494077	1	0.983	1
SMIM25	4.94e-05	-0.496252	0.209	0.441	1
S100A11	1.8e-10	-0.49883	0.985	0.998	4.69e-06
SGK1	0.0117817	-0.500967	0.896	0.903	1
NAPSB	0.000972542	-0.50402	0.403	0.589	1
LTA4H	0.00773799	-0.514088	0.552	0.656	1
PTGS2	0.0397288	-0.515444	0.104	0.202	1
MCEMP1	0.00253985	-0.516325	0.045	0.188	1
IGHG3	0.246483	-0.517712	0.119	0.183	1
UPP1	5.16e-06	-0.523027	0.418	0.703	0.134042
GDF15	0.00144241	-0.523138	0.045	0.202	1
MARCO	0.00347097	-0.523921	0.075	0.228	1
CD83	1.77e-05	-0.525444	0.358	0.624	0.460606
PLEK	0.000853187	-0.526034	0.746	0.833	1
PLAC8	0.000213344	-0.527003	0.03	0.221	1
NUPR1	0.0424286	-0.531395	0.343	0.464	1
PHLDA1	0.000299837	-0.536737	0.164	0.394	1
FCER1A	0.00262648	-0.537073	0.03	0.169	1
KLF6	0.000525794	-0.54133	0.896	0.945	1
RETN	0.000199695	-0.572219	0.06	0.262	1
HSPH1	0.00851416	-0.574415	0.597	0.73	1
TNFAIP3	0.00626878	-0.579797	0.493	0.633	1
S100A10	4.35e-06	-0.580252	0.821	0.951	0.113172
CLEC5A	2e-05	-0.59428	0.328	0.563	0.520235
KLF4	3.89e-05	-0.597455	0.433	0.671	1
NFKBIZ	0.000428036	-0.605689	0.239	0.456	1
CCL3L1	0.622331	-0.6096	0.582	0.548	1
NFKBIA	0.00172125	-0.6316	0.91	0.977	1
CXCL2	0.022996	-0.665659	0.239	0.384	1
S100A6	1.99e-11	-0.680047	0.97	0.99	5.18e-07
FBP1	0.000347764	-0.681356	0.463	0.629	1
G0S2	0.000320998	-0.7158	0.015	0.192	1
S100A4	2.71e-06	-0.723387	0.896	0.922	0.0704404
C15orf48	0.00231638	-0.750161	0.239	0.395	1
CXCL8	0.000408834	-0.75458	0.313	0.568	1
VCAN	0.0135165	-0.767492	0.149	0.268	1
CYP27A1	0.000143119	-0.787959	0.254	0.443	1
CCL3	0.0119578	-0.818149	0.642	0.743	1
IL1RN	0.000104202	-0.830957	0.104	0.331	1
CHI3L1	0.00510687	-0.840485	0.075	0.215	1
FCN1	0.000259463	-0.84815	0.06	0.264	1
RGCC	5.93e-05	-0.856064	0.254	0.473	1
TXN	8.34e-06	-0.868735	0.672	0.835	0.216729
ATF3	1.52e-05	-0.881419	0.328	0.606	0.395481
S100A8	8.65e-06	-0.910382	0.09	0.357	0.224807
PLIN2	3.4e-05	-0.913983	0.746	0.846	0.884006
CSTB	3.95e-06	-0.998341	0.881	0.949	0.102649
S100A9	5.9e-06	-1.17778	0.269	0.51	0.153338
BCL2A1	3.28e-12	-1.17822	0.239	0.671	8.53e-08
IL1B	0.00147491	-1.37018	0.313	0.492	1	TAM
CXCL10	0.354896	-1.40888	0.09	0.129	1
CD52	2.46e-09	-1.67845	0.463	0.724	6.39e-05
CCL18	0.011935	-1.77403	0.209	0.335	1

## Sheet: P21120201.clusterMacrophages6_d
gene_id	p_val	avg_logFC	pct.1	pct.2	p_val_adj
FCN1	1.37739e-39	2.12678	0.873	0.177	3.57971e-35
VCAN	4.07384e-29	1.66347	0.818	0.197	1.05875e-24
LYZ	1.37846e-23	1.39735	1	0.983	3.58248e-19
S100A8	4.19798e-21	1.39297	0.836	0.275	1.09101e-16
S100A9	2.97059e-14	1.30117	0.855	0.444	7.72026e-10
IFITM3	8.64624e-16	0.985186	0.982	0.935	2.24707e-11
IFITM2	3.22348e-11	0.879531	0.891	0.779	8.37751e-07
CCL17	0.0204135	0.83464	0.291	0.171	1
THBS1	4.71723e-10	0.832273	0.345	0.082	1.22596e-05
AREG	0.000711511	0.806605	0.273	0.119	1
TNFSF10	1.40365e-14	0.803355	0.836	0.418	3.64796e-10
LGALS2	1.14304e-16	0.793082	0.691	0.225	2.97064e-12
MX1	2.71705e-10	0.771581	0.891	0.615	7.06135e-06
IFI44L	1.55835e-11	0.771212	0.873	0.493	4.04999e-07
ISG15	3.59318e-09	0.760028	0.855	0.615	9.33831e-05
JAML	4.40596e-12	0.75241	0.891	0.621	1.14507e-07
XAF1	3.70282e-12	0.725421	0.927	0.671	9.62326e-08
CLEC10A	2.86838e-10	0.711051	0.745	0.37	7.45463e-06
CCR2	1.36624e-11	0.689727	0.655	0.253	3.55072e-07
F13A1	3.3592e-11	0.687996	0.909	0.569	8.73023e-07
CD36	4.08109e-19	0.678226	0.782	0.232	1.06063e-14
FN1	0.0162283	0.671299	0.873	0.799	1
CST3	8.92579e-14	0.658745	1	1	2.31972e-09
OAS2	1.59429e-09	0.656237	0.818	0.491	4.1434e-05
LY6E	1.62274e-11	0.652854	0.964	0.751	4.21733e-07
IFIT1	1.02977e-08	0.641914	0.673	0.335	0.000267626
MX2	2.82314e-13	0.639552	0.818	0.372	7.33707e-09
GIMAP7	1.3716e-11	0.621193	0.8	0.409	3.56466e-07
TMEM176A	1.62504e-09	0.611294	0.927	0.654	4.22333e-05
CLEC12A	3.14873e-13	0.606021	0.8	0.331	8.18323e-09
S100A4	3.29435e-10	0.598146	1	0.911	8.5617e-06
CSTA	7.50172e-11	0.594704	0.927	0.628	1.94962e-06
EIF2AK2	3.9749e-08	0.594062	0.836	0.58	0.00103304
TMEM176B	2.85189e-08	0.592347	0.873	0.762	0.000741179
NRG1	4.46285e-26	0.591664	0.382	0.028	1.15985e-21
RNASE6	1.72856e-11	0.587197	0.964	0.632	4.49235e-07
MS4A6A	4.48897e-12	0.587075	1	0.861	1.16664e-07
FPR1	6.32836e-08	0.573305	0.873	0.66	0.00164468
IFI44	2.80648e-10	0.570796	0.891	0.554	7.29377e-06
CPVL	1.35482e-09	0.568957	1	0.874	3.52104e-05
IFIT3	2.79545e-07	0.563246	0.745	0.478	0.00726509
RNASE2	1.5166e-17	0.562421	0.491	0.095	3.94149e-13
NRGN	3.81316e-19	0.55834	0.491	0.091	9.91003e-15
HRH2	1.41041e-14	0.555398	0.582	0.167	3.66552e-10
SAMD9	0.000152641	0.554222	0.636	0.452	1
OAS3	5.09103e-07	0.551694	0.636	0.333	0.0132311
AOAH	1.7555e-13	0.540591	0.764	0.336	4.56238e-09
CD2	3.61344e-23	0.532917	0.473	0.061	9.39098e-19
CLEC7A	5.38311e-08	0.530628	0.909	0.796	0.00139902
EPSTI1	2.34007e-09	0.518036	0.891	0.587	6.08162e-05
RGS18	2.6877e-10	0.512792	0.673	0.284	6.98505e-06
MNDA	8.51976e-10	0.508372	0.982	0.896	2.2142e-05
PARP9	2.22123e-07	0.503662	0.818	0.546	0.00577276
CD302	8.02178e-10	0.503002	0.891	0.617	2.08478e-05
TYMP	2.11939e-08	0.491753	0.964	0.818	0.000550808
LST1	1.62258e-10	0.487078	1	0.835	4.21691e-06
DDX58	2.11432e-10	0.481143	0.709	0.322	5.4949e-06
NCF2	4.37927e-09	0.479829	0.964	0.69	0.000113813
BST1	1.36753e-09	0.477458	0.6	0.255	3.55407e-05
MXD1	1.18881e-07	0.476561	0.509	0.219	0.00308961
LIMD2	6.23829e-07	0.47549	0.727	0.478	0.0162127
OSM	0.00110672	0.470525	0.255	0.11	1
GCA	7.38566e-08	0.469579	0.818	0.543	0.00191946
CST6	2.90432e-06	0.468201	0.509	0.243	0.0754805
SAMHD1	4.24786e-09	0.466235	0.982	0.954	0.000110398
P2RY6	3.77514e-10	0.463463	0.673	0.296	9.81121e-06
GLIPR1	1.21834e-07	0.463035	0.982	0.823	0.00316635
HIST1H1E	1.06279e-05	0.462968	0.564	0.31	0.276208
IFI6	1.89324e-08	0.459954	1	0.833	0.000492033
ASGR2	2.18142e-23	0.458974	0.382	0.033	5.6693e-19
IRF7	1.78461e-08	0.458618	0.727	0.379	0.000463803
SERPINA1	2.09161e-08	0.451886	0.982	0.928	0.00054359
AP1S2	1.34549e-05	0.450569	0.836	0.678	0.349679
UBE2D1	2.01408e-06	0.448318	0.764	0.532	0.0523438
SULT1A1	2.81123e-08	0.44637	0.527	0.23	0.00073061
TNFSF13B	1.79336e-08	0.446321	0.891	0.66	0.000466077
GSTP1	1.14431e-07	0.442631	0.964	0.946	0.00297394
THBD	0.00141973	0.440817	0.455	0.284	1
IFI16	2.96885e-07	0.439154	0.982	0.861	0.00771575
PTPRE	1.79512e-06	0.43861	0.782	0.545	0.0466532
MIF4GD	5.18366e-07	0.438554	0.691	0.414	0.0134718
PARP14	0.000840049	0.436854	0.8	0.68	1
HLA-DRB5	8.13074e-06	0.43666	0.964	0.684	0.21131
FGL2	1.14812e-07	0.432896	0.982	0.835	0.00298384
CD48	2.50435e-09	0.430166	0.855	0.476	6.50855e-05
MRC1	1.36564e-06	0.429089	0.909	0.719	0.0354916
MPEG1	5.11258e-06	0.428836	0.818	0.552	0.132871
SH3BGRL3	8.62148e-10	0.428565	1	0.983	2.24064e-05
RNF213	1.40258e-05	0.427535	0.873	0.686	0.364517
IL17RA	0.000359939	0.418419	0.727	0.545	1
ELK3	4.80082e-07	0.417331	0.582	0.292	0.0124769
PKIB	1.3481e-06	0.409554	0.673	0.348	0.0350359
VSIR	1.27524e-06	0.40827	0.836	0.621	0.0331423
IGFBP7	1.57569e-05	0.408184	0.745	0.563	0.409507
RPS9	1.81865e-12	0.407158	1	0.985	4.72649e-08
STAT1	1.90663e-06	0.395473	0.909	0.688	0.0495515
CRYBG1	1.00951e-05	0.39066	0.618	0.383	0.26236
FKBP5	8.9552e-06	0.390363	0.909	0.693	0.232737
OAS1	1.72175e-06	0.390176	0.836	0.524	0.0447467
IFI35	8.83795e-06	0.38987	0.691	0.422	0.22969
IL10RA	9.50536e-06	0.389018	0.764	0.519	0.247035
TMEM123	4.03314e-06	0.387559	0.909	0.764	0.104817
ATG3	1.74225e-07	0.387254	0.891	0.623	0.00452792
NAAA	1.86361e-05	0.384799	0.655	0.426	0.484333
SAMD9L	3.05705e-05	0.38108	0.836	0.639	0.794497
CMPK2	1.66774e-08	0.381037	0.509	0.197	0.000433429
CD180	3.68919e-06	0.377942	0.509	0.236	0.0958785
CNBP	5.8957e-08	0.37732	0.964	0.874	0.00153223
IFIH1	0.000409141	0.374372	0.636	0.422	1
HAUS1	5.77635e-06	0.374039	0.509	0.243	0.150122
SSR2	2.81578e-07	0.372847	0.945	0.762	0.00731793
SNX20	5.88615e-09	0.372077	0.564	0.23	0.000152975
TET2	1.75573e-06	0.366285	0.727	0.442	0.0456297
PHACTR2	1.78031e-08	0.365606	0.709	0.361	0.000462685
SUPT4H1	4.21215e-05	0.364789	0.782	0.673	1
AIF1	2.30385e-07	0.364405	1	0.965	0.00598749
UBE2L6	0.000179803	0.364117	0.8	0.665	1
SORL1	0.000106966	0.362584	0.764	0.55	1
RARA	2.68341e-06	0.361526	0.473	0.227	0.0697391
CD1D	9.54739e-08	0.360272	0.509	0.203	0.00248127
TXNIP	8.50657e-07	0.360096	1	0.983	0.0221077
SLFN5	0.00063421	0.359808	0.618	0.394	1
ARHGDIB	7.14047e-08	0.357556	0.982	0.95	0.00185574
DPYD	9.98635e-06	0.355729	0.764	0.537	0.259535
GAPDH	3.63821e-07	0.35305	1	0.983	0.00945534
GAPT	6.08341e-07	0.351987	0.745	0.377	0.0158102
STAB1	1.50759e-05	0.351015	0.673	0.368	0.391807
ADA2	6.81636e-05	0.349264	0.855	0.669	1
DDX60	0.000355285	0.348906	0.6	0.405	1
COTL1	2.46092e-06	0.348289	1	0.896	0.0639567
MT-TE	0.000936851	0.348145	0.618	0.429	1
CSF3R	2.24834e-05	0.346729	0.655	0.396	0.58432
CPPED1	8.11231e-05	0.346463	0.655	0.448	1
SNHG5	7.49986e-05	0.346302	0.945	0.762	1
2022-03-01	1.36433e-05	0.346038	0.891	0.729	0.354576
PRKCB	5.11445e-05	0.345664	0.436	0.225	1
AC020656.1	3.22995e-06	0.34418	0.673	0.387	0.0839432
DDX60L	0.000964522	0.343692	0.618	0.429	1
UQCRFS1	0.000142948	0.341857	0.727	0.548	1
BAZ2B	0.00111806	0.341853	0.764	0.587	1
RABGAP1L	0.000273067	0.340857	0.582	0.366	1
PABPC1	4.81626e-08	0.339738	1	0.998	0.0012517
PYCARD	3.45687e-06	0.339346	0.964	0.79	0.0898405
AKAP9	9.26339e-05	0.335296	0.873	0.615	1
DTX3L	0.000589644	0.334988	0.673	0.448	1
ANPEP	6.30299e-08	0.333949	0.618	0.26	0.00163808
APOL6	0.00298833	0.333065	0.673	0.494	1
CCR5	0.000239522	0.331812	0.564	0.325	1
CAPN2	0.00020599	0.330884	0.655	0.442	1
CYBB	1.44449e-05	0.329357	1	0.944	0.375407
MYCBP2	0.000287342	0.328638	0.727	0.535	1
BLVRA	3.7508e-05	0.3285	0.709	0.48	0.974797
DYNLT1	0.000199924	0.327954	0.782	0.593	1
CRTAP	7.17024e-05	0.325401	0.891	0.755	1
PTAFR	7.43718e-05	0.325367	0.964	0.809	1
RPS13	2.03156e-06	0.324721	0.982	0.994	0.0527982
ATF7IP	0.0160078	0.324519	0.582	0.446	1
JUP	3.83938e-09	0.32235	0.491	0.173	9.97816e-05
HACD4	0.000248998	0.317901	0.782	0.535	1
MAP3K1	5.24851e-06	0.317599	0.6	0.329	0.136403
SRGN	7.41976e-05	0.315747	1	0.987	1
ATP5IF1	0.0031408	0.315712	0.873	0.758	1
H2AFV	0.00020294	0.314459	0.873	0.749	1
ABRAXAS1	7.54485e-05	0.313624	0.236	0.08	1
HBEGF	0.0510403	0.313361	0.473	0.353	1
FBXL5	0.000400287	0.312983	0.727	0.567	1
HIST1H1D	0.000189999	0.311277	0.327	0.143	1
MYD88	4.88644e-05	0.310687	0.691	0.441	1
TPMT	0.000606052	0.310216	0.6	0.444	1
C4orf3	0.000388481	0.308228	0.855	0.749	1
SERP1	1.42079e-05	0.307398	0.909	0.851	0.369248
HCST	7.08575e-05	0.306629	0.927	0.73	1
PECAM1	0.000197567	0.306581	0.909	0.701	1
STXBP2	2.1159e-06	0.306122	0.818	0.53	0.0549902
IKZF1	4.18949e-05	0.305204	0.6	0.338	1
SIGLEC1	0.00020933	0.304102	0.655	0.388	1
MRPS34	0.000174312	0.303692	0.691	0.444	1
ZMYM4	0.000379325	0.303301	0.527	0.327	1
ENO1	0.00016542	0.303164	1	0.928	1
CDA	0.000105303	0.302829	0.273	0.106	1
C19orf38	1.06904e-06	0.302562	0.345	0.119	0.0277834
CD4	0.000551884	0.302481	0.855	0.723	1
ERP29	0.000218581	0.302126	0.891	0.719	1
MAX	7.4854e-05	0.301664	0.727	0.524	1
ABI3	1.37719e-05	0.300336	0.745	0.437	0.357918
TRABD	0.00209341	0.29871	0.509	0.322	1
PPA1	0.00144092	0.298643	0.673	0.509	1
STK17B	9.67604e-05	0.298396	0.764	0.504	1
PSMB9	0.000206183	0.298012	0.855	0.686	1
ATP5F1A	0.00110441	0.297915	0.964	0.822	1
EIF3M	0.000356729	0.297567	0.818	0.658	1
SH3KBP1	0.000470671	0.296932	0.782	0.558	1
AP002954.1	8.87547e-05	0.296638	0.2	0.061	1
EIF3F	0.000334292	0.296413	0.764	0.578	1
MBNL2	0.00330512	0.295422	0.527	0.355	1
KCNE3	0.0025638	0.295053	0.527	0.368	1
NEXN	1.49464e-07	0.294984	0.327	0.095	0.00388442
SAT2	9.44649e-05	0.294907	0.727	0.476	1
GIMAP4	0.00576255	0.294878	0.836	0.686	1
CEACAM4	2.7055e-11	0.294782	0.364	0.078	7.03132e-07
SECTM1	2.23333e-06	0.294752	0.382	0.143	0.058042
RNF7	0.000570748	0.294652	0.782	0.649	1
APAF1	5.2695e-06	0.294609	0.564	0.284	0.136949
CSF1R	2.94372e-05	0.293215	0.964	0.81	0.765044
SPECC1	0.000193089	0.292949	0.527	0.301	1
CTSH	3.13765e-05	0.29279	1	0.968	0.815444
BAG1	0.000692157	0.292521	0.564	0.381	1
PLSCR1	0.000325155	0.292228	0.855	0.768	1
DOK2	0.000258142	0.291719	0.673	0.446	1
SHISA5	0.000307123	0.290953	0.764	0.582	1
PRR13	0.000289118	0.290749	0.836	0.721	1
CD14	0.000701517	0.289735	0.982	0.892	1
SELL	1.38365e-06	0.289198	0.382	0.138	0.0359598
GSTK1	2.22931e-05	0.288544	0.909	0.812	0.579376
PKM	0.000268885	0.288444	0.982	0.929	1
PID1	3.02082e-08	0.287309	0.345	0.091	0.000785082
RPL21	5.07996e-06	0.286996	1	0.987	0.132023
ABRACL	0.00055061	0.286952	0.709	0.554	1
APRT	0.000291818	0.286894	0.855	0.783	1
NAGK	8.25724e-05	0.286107	0.855	0.665	1
PSMB8	0.000387955	0.285235	0.873	0.777	1
NUDT16	0.00535287	0.285178	0.6	0.468	1
RPL18A	3.74448e-06	0.285036	1	0.985	0.0973152
PAIP2	0.000173525	0.284732	0.891	0.73	1
CARD16	0.00103878	0.28467	0.709	0.524	1
FAM105A	0.00111725	0.283824	0.745	0.522	1
LAP3	0.000334798	0.283546	0.909	0.779	1
TRIM22	0.000400561	0.283419	0.782	0.626	1
CMIP	0.000759206	0.282896	0.564	0.375	1
ITGA5	0.000647827	0.282086	0.491	0.281	1
MLEC	0.00297317	0.280958	0.691	0.519	1
DOCK8	0.00176323	0.280795	0.8	0.639	1
TLN1	0.000151758	0.280722	0.982	0.862	1
PPT1	0.00010016	0.279797	0.982	0.931	1
STAT2	0.000218573	0.279344	0.6	0.396	1
GOLGA2	0.00425079	0.277649	0.545	0.361	1
NDUFB10	1.7744e-05	0.277426	0.836	0.625	0.461148
IGKC	0.000274153	0.276507	0.764	0.532	1
PRCP	0.00292903	0.275641	0.8	0.656	1
TKT	1.26842e-05	0.275361	0.982	0.794	0.329649
GNAI2	6.01852e-05	0.275073	0.982	0.961	1
WAS	0.00315519	0.274998	0.709	0.541	1
RACK1	3.5336e-06	0.274996	1	0.976	0.0918349
CPT2	0.000648441	0.274787	0.364	0.19	1
GLRX	5.26214e-05	0.274786	0.945	0.79	1
TMSB10	4.97562e-08	0.274099	1	1	0.00129311
PLAC8	6.27993e-09	0.274078	0.509	0.167	0.000163209
MT-TP	0.00423555	0.274039	0.382	0.242	1
SETX	0.00175862	0.27381	0.727	0.612	1
ZDHHC20	0.000140959	0.273526	0.636	0.392	1
MRPL28	0.000471445	0.273211	0.545	0.32	1
IFNAR2	0.000754395	0.272295	0.345	0.18	1
SPTLC2	0.00217878	0.272027	0.545	0.374	1
ATP5MC2	0.000329677	0.27202	1	0.946	1
SIRPB1	2.86906e-05	0.271915	0.6	0.34	0.745639
EIF4EBP1	0.00090286	0.271834	0.691	0.5	1
UQCRQ	0.000118322	0.271729	0.836	0.76	1
RNF130	0.000170297	0.2714	0.909	0.898	1
S100A10	4.71918e-05	0.271183	0.945	0.935	1
ANP32A	0.00143614	0.270821	0.818	0.686	1
PDLIM2	0.000150661	0.270626	0.382	0.186	1
SP110	0.00181732	0.269844	0.764	0.578	1
ZNF467	0.00302399	0.269243	0.218	0.091	1
LDHA	0.00834477	0.269096	0.855	0.764	1
ARMT1	0.000258758	0.268862	0.564	0.338	1
PDHB	0.0081968	0.268562	0.527	0.387	1
SRP9	0.000199987	0.268532	0.891	0.719	1
LYAR	0.00718408	0.267817	0.473	0.31	1
APOBEC3A	1.99895e-05	0.266507	0.218	0.061	0.519508
PSMB8-AS1	0.000217043	0.265913	0.545	0.297	1
PLBD1	0.000112455	0.265527	0.873	0.669	1
GRSF1	0.000661964	0.265337	0.764	0.602	1
IL27RA	0.000580325	0.264936	0.418	0.225	1
HNRNPA1	2.28604e-05	0.264863	0.982	0.926	0.594119
XRN2	0.00525387	0.264738	0.745	0.636	1
RNF181	0.000420532	0.264724	0.836	0.671	1
MYO1G	2.92694e-07	0.264615	0.4	0.134	0.00760684
SOCS3	7.54712e-05	0.264359	0.582	0.32	1
CD69	0.00415518	0.26399	0.6	0.4	1
CFP	7.74466e-10	0.262577	0.309	0.065	2.01276e-05
MKRN1	2.26233e-05	0.262467	0.636	0.344	0.587957
ITGAM	0.012738	0.262363	0.709	0.574	1
GIMAP1	0.000468156	0.262045	0.564	0.366	1
FES	2.15895e-05	0.261948	0.582	0.303	0.561089
AGTRAP	0.00280998	0.261469	0.6	0.45	1
PSMB6	0.00388718	0.260703	0.855	0.721	1
CALCOCO2	0.000513638	0.260329	0.655	0.459	1
RPL29	0.000135999	0.260141	1	0.983	1
SCAND1	0.0142715	0.260137	0.727	0.634	1
DNM1L	0.00965065	0.260079	0.509	0.349	1
HIGD2A	0.00226107	0.259961	0.855	0.777	1
ACPP	5.88992e-14	0.25879	0.364	0.061	1.53073e-09
LAMTOR2	0.000583381	0.258637	0.8	0.747	1
STX10	2.55986e-06	0.257776	0.655	0.362	0.0665281
TMEM70	0.107371	0.25739	0.509	0.422	1
BST2	0.00437665	0.256757	0.855	0.775	1
ZC3HAV1	0.00563797	0.256349	0.491	0.325	1
OXR1	0.00296422	0.255877	0.455	0.275	1
ISOC2	0.0153149	0.254174	0.436	0.31	1
TSPO	0.000915257	0.25396	0.964	0.939	1
TGFBI	5.00178e-05	0.253872	1	0.913	1
CD1C	3.9816e-05	0.253872	0.364	0.152	1
MSRB1	0.0599787	0.253851	0.364	0.258	1
CLEC4E	1.09325e-07	0.253493	0.582	0.238	0.00284125
CWC27	0.000644774	0.252696	0.382	0.193	1
SLC16A3	0.00196307	0.252317	0.836	0.658	1
HELZ2	0.0032075	0.252042	0.182	0.072	1
TES	1.8648e-05	0.25107	0.709	0.413	0.484643
ARHGAP9	0.000260592	0.251051	0.582	0.342	1
SMCHD1	0.0112645	0.250668	0.655	0.465	1
CHRAC1	0.0178538	0.250572	0.364	0.23	1
DNAJC8	0.0221432	0.250207	0.782	0.695	1
SLC15A3	0.0151771	-0.250105	0.436	0.567	1
CCND1	0.00245544	-0.250696	0.091	0.273	1
FRMD4A	0.000526034	-0.250812	0.055	0.26	1
MT-ND2	0.00782874	-0.251337	1	1	1
TBC1D2	0.00743354	-0.251638	0.182	0.361	1
CD276	0.00151864	-0.251769	0.145	0.351	1
CRYAB	0.142354	-0.251898	0.364	0.418	1
AKR1B1	0.0210393	-0.254494	0.636	0.716	1
HTRA4	0.00207942	-0.254866	0.018	0.177	1
SLC20A1	0.0241401	-0.256921	0.327	0.47	1
BCL2	0.00772237	-0.257277	0.127	0.284	1
IGHG4	0.934445	-0.257599	0.236	0.24	1
CITED2	0.562041	-0.257802	0.745	0.688	1
DNAJA4	0.0265994	-0.258006	0.073	0.188	1
SCPEP1	0.0244447	-0.258043	0.818	0.827	1
GADD45B	0.281709	-0.258059	0.855	0.825	1
S100B	0.172433	-0.258438	0.127	0.203	1
SGPP1	0.000537711	-0.258802	0.127	0.361	1
TUBA1C	0.0839243	-0.259556	0.636	0.682	1
TGM2	0.0170222	-0.262953	0.073	0.206	1
NCEH1	0.0120574	-0.265445	0.327	0.448	1
BASP1	0.0819542	-0.268794	0.345	0.422	1
DDAH2	0.000468408	-0.268805	0.291	0.546	1
SCARB2	0.00680264	-0.268965	0.545	0.667	1
C2	0.00237113	-0.270372	0.073	0.258	1
BCAP31	0.0132324	-0.270731	0.745	0.784	1
SNHG8	0.309618	-0.272355	0.655	0.621	1
SPARC	0.131231	-0.272597	0.327	0.39	1
MRPL18	0.0444357	-0.273094	0.473	0.587	1
TSC22D1	0.0296572	-0.273145	0.309	0.416	1
FABP3	0.000495331	-0.27379	0	0.186	1
ALCAM	0.0265851	-0.273885	0.782	0.792	1
EIF4A3	0.143207	-0.275728	0.527	0.61	1
DRAM1	0.0102097	-0.275793	0.218	0.362	1
ATOX1	0.0461189	-0.275806	0.709	0.719	1
ARL4A	0.0250687	-0.276008	0.291	0.455	1
ATP1A1	0.000727369	-0.277809	0.673	0.773	1
HIF1A	0.0468556	-0.278256	0.709	0.74	1
DUSP1	0.181913	-0.278266	0.945	0.963	1
CYTIP	0.146861	-0.278532	0.436	0.476	1
TIPARP	0.0176341	-0.278894	0.309	0.452	1
P3H2	0.00171019	-0.280081	0.036	0.208	1
KCNMA1	0.000167858	-0.280401	0.036	0.277	1
DCXR	0.325968	-0.280483	0.491	0.491	1
ALAS1	0.0137122	-0.281768	0.309	0.424	1
DUSP6	0.0191752	-0.284774	0.418	0.559	1
HERPUD1	0.101495	-0.284899	0.818	0.851	1
GADD45A	0.0105617	-0.286345	0.127	0.273	1
SPRED1	0.0116616	-0.28729	0.436	0.591	1
RIPK2	0.0562935	-0.289161	0.382	0.472	1
CSF1	0.0109633	-0.289999	0.018	0.136	1
ALDH1A1	0.0820785	-0.290651	0.255	0.344	1
RPS27L	0.0127447	-0.29071	0.745	0.842	1
CNDP2	0.00583403	-0.290916	0.545	0.652	1
NR4A1	0.0397236	-0.291084	0.327	0.439	1
CTSZ	0.282688	-0.291202	0.982	0.931	1
HCAR2	0.0392556	-0.293158	0.073	0.182	1
VMO1	0.00176307	-0.295285	0.036	0.214	1
RNASE1	0.030945	-0.295428	0.273	0.149	1
ZBTB10	0.00245345	-0.295772	0.018	0.173	1
NR4A3	0.00470997	-0.297683	0.036	0.184	1
IGHG3	0.00469999	-0.298106	0.309	0.162	1
ZFYVE16	0.0121031	-0.298816	0.327	0.468	1
RGS16	0.0657127	-0.29882	0.109	0.21	1
B3GNT2	0.00200935	-0.299766	0.164	0.34	1
P2RX7	0.0135538	-0.300135	0.218	0.364	1
PELI1	0.00332498	-0.300605	0.127	0.299	1
MT-ND4	0.000931384	-0.301615	1	1	1
NRP1	0.031328	-0.304455	0.4	0.504	1
UGCG	0.0151907	-0.304833	0.273	0.401	1
RAB42	0.00114242	-0.304984	0.055	0.24	1
MGLL	0.00371562	-0.305391	0.091	0.258	1
FNIP2	0.00430939	-0.305949	0.182	0.348	1
G0S2	0.31931	-0.306802	0.127	0.177	1
SLC3A2	0.0010959	-0.308616	0.564	0.69	1
STMN1	0.0603455	-0.309626	0.382	0.498	1
OGFRL1	0.101549	-0.310177	0.764	0.751	1
LILRB4	0.00716601	-0.310232	0.764	0.758	1
CA2	0.0331122	-0.311014	0.145	0.26	1
NRP2	6.42395e-05	-0.312092	0.145	0.444	1
RASGEF1B	0.0178739	-0.313357	0.255	0.377	1
LAMP1	0.027627	-0.31396	0.673	0.686	1
PPP1R15B	0.0366555	-0.315106	0.345	0.465	1
SMIM25	0.0261104	-0.315558	0.291	0.428	1
CAPG	0.00526855	-0.31617	0.964	0.944	1
PLAU	0.0850514	-0.3164	0.6	0.647	1
ISCU	0.00713276	-0.316765	0.618	0.721	1
PTGER4	0.185356	-0.319231	0.455	0.48	1
DOCK4	0.00021048	-0.319984	0.2	0.435	1
TXNRD1	0.03117	-0.325999	0.455	0.545	1
JUND	0.0310085	-0.326576	0.418	0.511	1
GLUL	0.12724	-0.329336	0.982	0.933	1
MT-CYB	0.000224854	-0.329631	1	1	1
TCP1	0.00202982	-0.329948	0.473	0.628	1
CLK1	0.0232546	-0.329952	0.491	0.615	1
MT-RNR1	0.00356989	-0.33034	1	1	1
KLF4	0.64099	-0.331029	0.691	0.639	1
FCGR3A	0.224435	-0.331408	0.909	0.779	1
MARCKS	0.002847	-0.332742	0.8	0.864	1
SOX4	0.0220699	-0.335536	0.091	0.21	1
EPHX1	0.0931657	-0.33778	0.273	0.346	1
CACYBP	0.000876191	-0.338231	0.564	0.697	1
EPB41L2	0.00395863	-0.343995	0.327	0.485	1
MGST3	0.00192259	-0.344435	0.618	0.758	1
CD63	0.000625347	-0.34711	1	0.981	1
EMP1	0.0235355	-0.347381	0.236	0.381	1
GNB4	0.000314415	-0.348294	0.473	0.651	1
MT1G	0.235392	-0.348706	0.236	0.294	1
DDIT3	0.0212884	-0.351332	0.255	0.388	1
ASAH1	0.0141802	-0.353464	0.891	0.883	1
PMAIP1	0.049303	-0.354336	0.182	0.283	1
MT-CO3	1.40611e-05	-0.355883	1	1	0.365435
RMDN3	0.000598863	-0.356626	0.127	0.342	1
DNAJB4	0.0126074	-0.358052	0.2	0.362	1
CH25H	0.369011	-0.358452	0.182	0.217	1
SDS	0.0119695	-0.359288	0.145	0.301	1
VAT1	0.00280663	-0.361683	0.364	0.517	1
BRD2	0.00204783	-0.362132	0.6	0.738	1
FUCA1	0.909746	-0.363666	0.618	0.548	1
ICAM1	0.00585351	-0.363886	0.418	0.571	1
MPC2	9.56604e-05	-0.367885	0.364	0.586	1
MDM2	0.00198655	-0.367887	0.273	0.47	1
ARID5B	0.00417452	-0.367999	0.164	0.34	1
TREM2	0.000355829	-0.368404	0.8	0.896	1
LHFPL2	0.00234514	-0.36897	0.509	0.647	1
FCER1A	0.0763943	-0.370361	0.073	0.162	1
C5AR1	0.00380771	-0.371171	0.418	0.582	1
SAT1	0.00151139	-0.37321	1	0.987	1
HLA-DOA	0.00318315	-0.373224	0.6	0.684	1
CREG1	0.139677	-0.373265	0.855	0.807	1
HSPA8	0.0026755	-0.382073	0.982	0.963	1
PLTP	0.0331728	-0.383689	0.273	0.394	1
OLFML3	0.000903039	-0.385906	0.091	0.301	1
FMNL2	3.98332e-06	-0.387416	0.218	0.559	0.103523
PTMS	0.000452931	-0.388565	0.455	0.63	1
CTSK	0.00745614	-0.392349	0	0.117	1
SNX10	0.00357889	-0.392494	0.691	0.799	1
SUCNR1	1.29712e-05	-0.39706	0.018	0.29	0.337109
PLD4	0.02814	-0.397794	0.327	0.446	1
IFRD1	5.38605e-05	-0.397817	0.055	0.32	1
FCGR2A	0.0142625	-0.400499	0.927	0.901	1
PPARG	0.000192846	-0.402218	0.073	0.307	1
CHIT1	0.00920335	-0.403542	0	0.112	1
MT-ND3	6.08405e-06	-0.403941	0.964	0.994	0.158118
CCL13	0.357544	-0.404309	0.309	0.234	1
NPL	0.024257	-0.404929	0.4	0.491	1
PRDX1	0.000121464	-0.40727	0.945	0.959	1
ACSL1	0.000273657	-0.408102	0.236	0.476	1
PLD3	0.186434	-0.408976	0.782	0.727	1
PLAUR	0.0416889	-0.412093	0.636	0.669	1
CPM	0.0289195	-0.415607	0.545	0.604	1
UBC	0.00739806	-0.419226	1	0.989	1
NR4A2	0.564146	-0.423472	0.273	0.281	1
KLF2	0.00184748	-0.424221	0.164	0.362	1
CD59	0.000196128	-0.428022	0.364	0.58	1
IER2	0.666373	-0.428311	0.855	0.788	1
C3AR1	0.000169223	-0.431398	0.582	0.786	1
IL1RN	0.862804	-0.431947	0.309	0.305	1
TRIB1	0.00770999	-0.434804	0.364	0.496	1
SLCO2B1	0.000270667	-0.43688	0.582	0.68	1
FOLR2	0.776703	-0.438549	0.473	0.39	1
CCNL1	0.00354712	-0.439301	0.673	0.784	1
PLK2	0.0626923	-0.441031	0.164	0.26	1
USP53	0.000829034	-0.443152	0.127	0.338	1
GCHFR	0.198683	-0.443611	0.345	0.379	1
HTRA1	0.00160858	-0.444754	0.073	0.27	1
FILIP1L	0.0101066	-0.448081	0.309	0.435	1
IGLC2	0.731639	-0.448262	0.145	0.156	1
PLEK	0.0566314	-0.45946	0.891	0.816	1
CDKN1A	0.00634046	-0.46105	0.491	0.638	1
CX3CR1	0.200451	-0.471558	0.382	0.387	1
MMP14	3.3913e-05	-0.472647	0.273	0.559	0.881364
B3GNT5	0.000139061	-0.475265	0.382	0.634	1
MARCO	0.377239	-0.476056	0.182	0.214	1
MYADM	4.19066e-05	-0.476272	0.327	0.6	1
TFRC	0.0124512	-0.47636	0.218	0.353	1
NINJ1	0.00106598	-0.477136	0.509	0.688	1
CXCL3	0.271265	-0.478805	0.182	0.234	1
MS4A7	6.63881e-05	-0.481949	0.873	0.909	1
EGR2	0.0174492	-0.492786	0.309	0.478	1
PTGS2	0.0404552	-0.492796	0.091	0.201	1
ALOX5AP	0.0226493	-0.493426	0.945	0.862	1
SCD	3.35285e-06	-0.501901	0.073	0.377	0.0871372
GADD45G	0.00307883	-0.507163	0.2	0.374	1
HCAR3	0.0167605	-0.50969	0.036	0.154	1
DNAJA1	0.00426697	-0.511511	0.745	0.842	1
ADM	0.000787265	-0.513501	0.109	0.331	1
C1QA	2.22946e-05	-0.514811	0.691	0.92	0.579415
TWISTNB	0.370036	-0.516594	0.345	0.388	1
HLA-DQA2	0.000118237	-0.519479	0.055	0.301	1
DAB2	1.93137e-05	-0.52121	0.727	0.803	0.501945
LITAF	1.34215e-07	-0.522319	0.8	0.911	0.00348811
TRA2B	0.0216905	-0.525772	0.636	0.721	1
UBB	7.56373e-06	-0.527706	1	0.993	0.196574
CTSB	0.00626207	-0.531321	0.982	0.993	1
GM2A	0.00714057	-0.531838	0.564	0.649	1
P2RY13	0.352247	-0.534195	0.636	0.632	1
SOAT1	2.63637e-05	-0.535239	0.564	0.712	0.685167
SLAMF7	0.000417186	-0.540515	0.018	0.219	1
PHLDA1	0.00709369	-0.5454	0.218	0.383	1
SQSTM1	4.39828e-05	-0.551245	0.782	0.831	1
GDF15	0.000246364	-0.551963	0	0.203	1
PDK4	0.00889944	-0.552575	0.436	0.613	1
HSPA6	0.126759	-0.554851	0.218	0.296	1
GPR34	2.83305e-05	-0.563876	0.473	0.686	0.736282
OTUD1	2.71123e-05	-0.567052	0.091	0.366	0.70462
CD9	1.73972e-07	-0.568058	0.727	0.911	0.00452135
CXCL2	0.125547	-0.575315	0.291	0.375	1
FTL	0.0474992	-0.579311	1	1	1
LGALS3	0.0819812	-0.586751	0.873	0.857	1
PLA2G7	0.0253848	-0.592999	0.327	0.414	1
ACP5	0.546926	-0.598563	0.727	0.604	1
PHACTR1	5.78172e-05	-0.598713	0.236	0.478	1
ZFAND2A	0.025355	-0.609323	0.182	0.309	1
BAG3	0.030636	-0.633091	0.164	0.284	1
FABP5	0.00610539	-0.64111	0.473	0.574	1
HSPE1	1.21609e-05	-0.641481	0.673	0.851	0.316049
CXCL16	7.3996e-10	-0.643253	0.618	0.911	1.92308e-05
TXN	0.128899	-0.652068	0.927	0.805	1
IER5	0.0171507	-0.653575	0.564	0.638	1
C3	0.0168639	-0.654045	0.564	0.612	1
NFKBIZ	0.0167694	-0.658925	0.327	0.442	1
HPGDS	5.25424e-07	-0.666852	0.055	0.388	0.0136552
MT-RNR2	1.31937e-08	-0.671759	1	1	0.000342892
NFKBIA	0.0394049	-0.673779	1	0.967	1
TNFAIP3	0.00326776	-0.699148	0.491	0.63	1
HSPB1	0.000907467	-0.70809	0.764	0.894	1
FTH1	4.57875e-07	-0.712239	1	1	0.0118997
LPL	8.72414e-05	-0.719912	0.018	0.253	1
EGR1	0.101041	-0.720843	0.745	0.766	1
FCGBP	0.000422176	-0.741753	0.073	0.279	1
MMP9	0.0192408	-0.748238	0.091	0.227	1
HSP90AB1	5.14034e-06	-0.748855	0.982	0.993	0.133592
CYP27A1	0.00123414	-0.749156	0.273	0.437	1
A2M	3.55525e-09	-0.751254	0.618	0.879	9.23974e-05
C15orf48	0.00166973	-0.766664	0.2	0.396	1
HSPD1	1.71811e-05	-0.771048	0.745	0.84	0.446521
SOD2	7.37179e-07	-0.771546	0.327	0.608	0.0191585
LIPA	5.95469e-05	-0.77755	0.636	0.743	1
SPP1	0.00067295	-0.78672	0.345	0.526	1
BHLHE41	6.55279e-09	-0.79304	0.182	0.563	0.0001703
HLA-DRB6	3.48504e-05	-0.797918	0.055	0.348	0.905727
FOSB	9.26378e-05	-0.810344	0.382	0.623	1
SGK1	3.37341e-10	-0.83806	0.745	0.918	8.76715e-06
RGCC	0.0006909	-0.841361	0.273	0.467	1
C1QC	1.51652e-08	-0.852626	0.709	0.896	0.00039413
KLF6	6.56162e-07	-0.868863	0.836	0.95	0.017053
IER3	0.17935	-0.869149	0.782	0.734	1
CHI3L1	0.00809049	-0.875357	0.073	0.212	1
CSTB	0.00664399	-0.880236	0.945	0.941	1
C1QB	4.2571e-09	-0.881592	0.636	0.903	0.000110638
MSR1	5.11265e-11	-0.90593	0.455	0.812	1.32873e-06
NUPR1	0.000201845	-0.957262	0.273	0.468	1
JUN	7.52387e-07	-0.974853	1	0.987	0.0195538
CLDN1	5.11147e-07	-1.00594	0.109	0.455	0.0132842
SLC40A1	0.0229353	-1.01376	0.309	0.394	1
PPP1R15A	4.59026e-07	-1.0267	0.436	0.738	0.0119296
TNF	0.00282551	-1.047	0.2	0.368	1
HMOX1	0.0029086	-1.05891	0.618	0.727	1
CCL2	0.288065	-1.11358	0.382	0.403	1
CTSD	0.00011125	-1.1525	0.945	0.898	1
GPNMB	0.000266796	-1.18496	0.618	0.712	1
LGMN	0.00152413	-1.19062	0.436	0.537	1
CD83	3.93079e-08	-1.2205	0.291	0.625	0.00102157
ATF3	6.6653e-05	-1.22189	0.418	0.591	1
IL1B	0.174287	-1.23169	0.455	0.474	1
SELENOP	0.0113771	-1.24429	0.145	0.29	1
HSP90AA1	1.34293e-10	-1.28434	0.964	0.994	3.49015e-06
BCL2A1	4.68746e-11	-1.30075	0.236	0.662	1.21822e-06
PLIN2	2.97563e-07	-1.32751	0.745	0.844	0.00773335
RGS1	2.32972e-08	-1.33203	0.727	0.885	0.000605471
HSPH1	0.000442542	-1.34398	0.6	0.727	1
CTSL	5.81335e-05	-1.402	0.636	0.71	1
APOE	2.24359e-09	-1.40978	0.509	0.809	5.83087e-05
HSPA1B	1.23815e-07	-1.4182	0.564	0.779	0.00321782
APOC1	5.8278e-09	-1.52517	0.582	0.79	0.000151459
CXCL10	0.0407674	-1.55408	0.036	0.134	1
HSPA1A	8.28419e-09	-1.69198	0.891	0.935	0.000215298
CCL18	0.000635464	-1.84641	0.127	0.34	1
CCL3L1	2.52238e-05	-1.89407	0.327	0.574	0.655541
CCL4L2	0.000108186	-1.97901	0.382	0.587	1
CCL3	2.33304e-09	-2.13269	0.455	0.76	6.06333e-05
DNAJB1	1.20549e-12	-2.23803	0.527	0.84	3.13294e-08
CXCL8	9.75453e-07	-2.50591	0.291	0.565	0.0253511
CCL4	1.36892e-06	-2.86365	0.473	0.704	0.035577

## Sheet: P21120201.clusterMacrophages7_d
gene_id	p_val	avg_logFC	pct.1	pct.2	p_val_adj
CXCL10	1.68803e-14	3.92155	0.619	0.107	4.38702e-10
CXCL9	5.56412e-24	2.87014	0.429	0.021	1.44606e-19
CXCL11	1.32969e-23	2.65135	0.333	0.01	3.45572e-19
C15orf48	2.15972e-16	2.01351	1	0.355	5.6129e-12
GBP1	9.26388e-07	1.96097	0.81	0.493	0.0240759
GBP5	2.42217e-12	1.58935	0.81	0.245	6.29499e-08
SOD2	1.33764e-08	1.5594	0.905	0.57	0.000347641
SLAMF7	1.70878e-16	1.25629	0.857	0.177	4.44095e-12
WARS	1.03653e-06	1.23603	0.857	0.542	0.0269383
GBP4	9.32448e-05	1.23372	0.714	0.4	1
CCL8	0.00867471	1.1019	0.238	0.084	1
IRF1	3.07425e-06	1.10028	0.714	0.372	0.0798966
IL7R	0.00187905	1.05431	0.476	0.243	1
TAP1	3.87898e-07	1.04445	0.857	0.46	0.0100811
NINJ1	1.33927e-06	1.03858	1	0.659	0.0348062
IL4I1	1.38549e-12	1.03457	0.905	0.29	3.60074e-08
VAMP5	0.000101299	1.02775	0.667	0.369	1
CD40	0.000281282	1.02287	0.667	0.465	1
NUB1	0.000432688	1.02135	0.81	0.58	1
IDO1	6.3982e-22	0.899707	0.333	0.012	1.66283e-17
PLEK	1.75748e-07	0.862244	1	0.816	0.00456751
APOBEC3A	2.26305e-10	0.852635	0.429	0.063	5.88144e-06
ICAM1	8.46871e-06	0.841469	0.857	0.545	0.220093
S100A10	3.85346e-05	0.813663	1	0.934	1
PPA1	0.00033889	0.811694	0.81	0.514	1
P2RX7	0.000283481	0.791191	0.619	0.341	1
CCL22	7.47116e-08	0.766756	0.286	0.038	0.00194168
BIRC3	5.29279e-08	0.75986	0.667	0.21	0.00137554
EMP3	2.04621e-07	0.749255	1	0.907	0.00531788
PSTPIP2	4.21917e-05	0.739527	0.524	0.203	1
HMOX1	0.070038	0.733149	0.571	0.722	1
FCGR1B	0.00731743	0.731253	0.571	0.381	1
DRAM1	3.06778e-06	0.728413	0.762	0.334	0.0797285
NFKB1	8.21728e-06	0.717069	0.667	0.288	0.213559
PSME2	1.94773e-05	0.716308	0.952	0.771	0.506195
LAP3	5.87204e-05	0.6919	0.952	0.785	1
LAMP3	9.77126e-12	0.683769	0.286	0.023	2.53945e-07
IFIT2	0.358421	0.681336	0.286	0.463	1
KYNU	0.011606	0.681153	0.619	0.493	1
TGFBI	0.00938809	0.661771	0.905	0.921	1
NMB	0.657935	0.660588	0.143	0.119	1
EBI3	0.00440773	0.640632	0.238	0.073	1
FCGR1A	0.00299782	0.634795	0.905	0.699	1
GADD45G	0.0249045	0.626457	0.524	0.351	1
TNFAIP8	0.000369565	0.61437	0.762	0.535	1
PTPN1	0.00253877	0.612532	0.714	0.442	1
FLNA	4.34245e-05	0.594845	0.857	0.589	1
ARFGAP3	0.00158219	0.592723	0.714	0.449	1
YWHAZ	1.86956e-06	0.59037	0.952	0.921	0.0485879
CCL13	0.707622	0.589186	0.19	0.243	1
LITAF	0.000286589	0.58429	0.952	0.899	1
SUB1	1.40421e-05	0.577454	0.952	0.827	0.364941
STAT1	0.000722285	0.575702	0.952	0.699	1
SLAMF8	0.0113699	0.570587	0.762	0.631	1
ANKRD22	2.13235e-05	0.567972	0.667	0.267	0.554178
ATF5	4.55053e-05	0.561549	0.619	0.248	1
TNFAIP2	0.0334153	0.554938	0.619	0.472	1
SDF2L1	5.12215e-05	0.554288	0.857	0.507	1
EIF5A	0.00320755	0.547466	0.762	0.659	1
STEAP4	3.79867e-09	0.547097	0.238	0.021	9.87236e-05
HNRNPM	1.13376e-05	0.545183	0.952	0.691	0.294652
ACSL1	0.0121995	0.540125	0.667	0.446	1
RARRES3	0.000491029	0.539679	0.714	0.393	1
PSMD7	0.000659676	0.53615	0.905	0.607	1
PEA15	0.00035221	0.529914	0.905	0.764	1
NFKB2	3.24495e-07	0.524661	0.619	0.185	0.0084333
NBN	0.0344045	0.524113	0.714	0.594	1
TNFSF10	0.11092	0.522976	0.524	0.455	1
MREG	5.73385e-07	0.520045	0.476	0.119	0.0149017
DDX21	0.00409005	0.516175	0.667	0.565	1
CSF2RA	0.00498602	0.515664	0.714	0.603	1
OLR1	0.002301	0.51292	0.952	0.731	1
ADGRE5	0.00143484	0.512109	0.714	0.516	1
CD58	0.000433835	0.510323	0.857	0.642	1
CD80	0.0114472	0.50223	0.286	0.121	1
FPR1	0.10852	0.501032	0.762	0.677	1
AC005515.1	4.00329e-17	0.49955	0.19	0.003	1.04041e-12
ENO1	0.000214129	0.494706	1	0.932	1
GADD45GIP1	5.34085e-05	0.494446	0.857	0.589	1
FABP5	0.00253079	0.493751	0.81	0.556	1
ARHGDIA	2.46155e-05	0.493419	0.905	0.715	0.639733
SQOR	0.000713219	0.48641	0.905	0.677	1
TIMP1	0.00977473	0.484099	0.905	0.767	1
TAPBP	8.37233e-06	0.483117	0.952	0.71	0.217588
EML4	0.0016148	0.481536	0.905	0.664	1
GRINA	0.00465032	0.481044	0.857	0.724	1
SDC4	0.0330377	0.475876	0.476	0.29	1
SPHK1	0.000263323	0.474791	0.381	0.129	1
CD274	6.64008e-06	0.474614	0.429	0.112	0.172569
CFLAR	0.0165357	0.473138	0.81	0.661	1
GK	0.00304287	0.472436	0.571	0.318	1
TWISTNB	0.0866238	0.472215	0.524	0.379	1
RALA	0.00680029	0.472185	0.667	0.516	1
LMNA	0.431492	0.469842	0.429	0.381	1
PDIA3	6.24706e-05	0.469669	0.952	0.914	1
CLEC4E	0.8519	0.468593	0.286	0.269	1
APOL3	0.0502457	0.46588	0.286	0.156	1
MT2A	0.010079	0.464493	0.857	0.743	1
ISG20	0.026403	0.462737	0.286	0.131	1
GPR84	7.18226e-08	0.460578	0.667	0.192	0.0018666
MIEN1	0.00114182	0.460251	0.762	0.549	1
PHB2	0.0187533	0.459542	0.714	0.58	1
BID	0.0571541	0.456991	0.619	0.491	1
BASP1	0.182365	0.455968	0.476	0.413	1
NMI	0.007486	0.454498	0.81	0.535	1
SERPING1	0.145893	0.453589	0.619	0.577	1
SAMD9L	0.0501863	0.453342	0.81	0.652	1
ADGRE2	8.06728e-05	0.451106	0.619	0.247	1
CHCHD2	3.00258e-05	0.450286	1	0.899	0.780341
CYTOR	0.00026978	0.449944	0.524	0.224	1
IFNGR2	0.0125152	0.449236	0.762	0.747	1
PTAFR	0.025342	0.445386	0.857	0.822	1
FKBP5	0.00235409	0.444771	0.857	0.708	1
OSTC	0.00383882	0.4434	0.905	0.698	1
CALR	0.000509475	0.442831	0.952	0.904	1
LSM6	0.0281873	0.442559	0.619	0.512	1
ARNTL2	2.13269e-06	0.442311	0.381	0.084	0.0554264
BHLHE40	0.0394255	0.438549	0.667	0.507	1
UPP1	0.0281351	0.437617	0.81	0.666	1
SMCO4	0.00294187	0.436883	0.714	0.465	1
VIM	0.00114656	0.436368	1	0.995	1
HAPLN3	5.14932e-09	0.435701	0.381	0.059	0.000133826
HMGA1	0.0278653	0.431119	0.619	0.476	1
RDX	0.0751037	0.42881	0.524	0.418	1
GLIPR2	0.000170612	0.428648	0.762	0.458	1
G0S2	0.00493105	0.428129	0.381	0.164	1
RPN1	0.000984642	0.428041	0.857	0.668	1
SNRPG	0.0103544	0.427749	0.857	0.666	1
HSPA5	0.000316396	0.427445	0.905	0.907	1
CST6	0.00255958	0.426111	0.524	0.259	1
TFEC	0.0096847	0.421783	0.857	0.698	1
ARAP2	0.507432	0.421722	0.286	0.241	1
PFN1	9.79681e-06	0.42071	1	0.998	0.254609
METTL1	2.94743e-09	0.420317	0.571	0.126	7.66008e-05
PDCD5	0.00134672	0.418442	0.714	0.448	1
SLC2A6	2.64937e-06	0.417379	0.381	0.087	0.0688544
TRIM69	0.00658499	0.416332	0.571	0.311	1
MANF	0.0129737	0.414904	0.571	0.346	1
ARPC4	0.00190294	0.414231	0.857	0.74	1
PARP14	0.0957484	0.413766	0.762	0.689	1
BAZ1A	0.000551263	0.412355	0.762	0.483	1
CUL1	0.0043421	0.409847	0.667	0.411	1
NOP58	0.00174762	0.409247	0.714	0.458	1
TIMM17A	0.0884463	0.409075	0.619	0.493	1
TUBA1C	0.000690509	0.404771	0.952	0.668	1
TRAF1	3.33914e-05	0.404456	0.286	0.061	0.867809
RASGEF1B	1.38827e-05	0.402868	0.81	0.35	0.360797
RASSF5	0.000180825	0.397902	0.619	0.274	1
CALHM6	0.341929	0.396486	0.286	0.236	1
CD47	0.00411493	0.393962	0.762	0.617	1
VEGFA	0.0125556	0.393031	0.476	0.287	1
SCAMP3	0.000699077	0.392745	0.762	0.407	1
EIF4G1	0.00148995	0.392445	0.667	0.477	1
APOL6	0.00370467	0.391967	0.762	0.502	1
PTPN2	0.00653277	0.390124	0.667	0.521	1
CD44	0.000422015	0.389877	0.952	0.878	1
IER3	0.240212	0.389754	0.762	0.738	1
PRELID1	0.00242632	0.389425	0.81	0.699	1
ARHGAP31	0.0127278	0.389211	0.476	0.287	1
PSMA3	0.0191121	0.388799	0.762	0.675	1
NRP2	0.0496492	0.388585	0.571	0.411	1
SOCS1	0.225285	0.387921	0.429	0.355	1
RBM8A	0.00825709	0.387312	0.762	0.724	1
FNDC3B	0.0972988	0.386838	0.667	0.514	1
NEXN	0.573792	0.386038	0.143	0.115	1
ELOC	0.102089	0.386016	0.762	0.647	1
SAMSN1	0.877385	0.383123	0.476	0.495	1
SEC61B	0.000775398	0.3825	0.952	0.767	1
TOR3A	0.02667	0.382251	0.524	0.344	1
ALAS1	0.267344	0.381086	0.476	0.411	1
CST7	0.0473425	0.380301	0.238	0.112	1
CASP7	0.000143132	0.379147	0.429	0.152	1
PRDM1	0.0163363	0.378838	0.524	0.304	1
TMSB10	0.00035054	0.37804	1	1	1
PHLDA2	0.189282	0.376756	0.238	0.156	1
JAK2	0.0104627	0.375558	0.667	0.421	1
SELENOS	0.056422	0.375264	0.667	0.5	1
IL32	0.00844719	0.37492	0.19	0.056	1
RNF213	0.00436679	0.374618	0.952	0.694	1
SERPINB9	0.000221368	0.373242	0.667	0.309	1
FPR3	0.00967086	0.368507	0.81	0.694	1
PDIA4	0.303678	0.367809	0.571	0.537	1
UBE2A	0.0321358	0.367587	0.714	0.566	1
LGALS1	0.00287288	0.3671	1	0.946	1
CASP4	0.0626168	0.366933	0.619	0.495	1
CA2	0.232554	0.366494	0.333	0.247	1
RHOQ	0.00952183	0.365815	0.619	0.374	1
MT-ND4L	0.148142	0.365083	0.952	0.942	1
EIF2S1	0.00438648	0.364913	0.667	0.462	1
CD53	0.000123282	0.364683	1	0.953	1
PRDX1	0.00554709	0.363935	1	0.956	1
SERPINF1	0.142763	0.362929	0.619	0.497	1
GCH1	3.77852e-06	0.362516	0.333	0.068	0.0981999
RGS1	0.0157165	0.361931	0.905	0.869	1
IRF8	0.526658	0.360989	0.524	0.469	1
FBL	0.00579835	0.360217	0.667	0.409	1
PPIB	0.00113429	0.360054	0.952	0.934	1
IL2RG	0.0109844	0.359615	0.619	0.428	1
CISD3	0.0298229	0.359422	0.667	0.528	1
PPHLN1	0.00173291	0.357247	0.857	0.547	1
RIF1	0.0285631	0.355663	0.524	0.33	1
CCDC167	0.00614143	0.354424	0.381	0.178	1
HCK	0.000559104	0.354109	0.905	0.747	1
RELB	0.0049164	0.353531	0.381	0.171	1
PSMB5	0.018063	0.352467	0.714	0.521	1
P2RX4	0.496651	0.352303	0.476	0.437	1
HLA-DQA1	0.180149	0.352225	1	0.986	1
NHP2	0.0152082	0.351348	0.667	0.498	1
CIITA	0.00412486	0.350059	0.667	0.397	1
MYL6	0.00108535	0.348987	0.952	1	1
UBE2L6	0.0211619	0.348374	0.762	0.675	1
RIPK2	0.00238058	0.347123	0.714	0.455	1
WFDC21P	0.240167	0.345858	0.19	0.115	1
ADAM8	0.0994373	0.345251	0.381	0.267	1
TP53BP2	0.0157718	0.344743	0.476	0.257	1
KCNN4	2.28193e-05	0.344505	0.571	0.196	0.593052
LMNB1	0.00943741	0.343886	0.381	0.173	1
SSNA1	0.0272493	0.342747	0.619	0.474	1
COMTD1	0.00266512	0.340913	0.381	0.154	1
KIFC3	0.00716698	0.340427	0.333	0.136	1
CHMP4B	0.0170306	0.33929	0.762	0.633	1
MARCKS	0.0227317	0.337797	0.952	0.855	1
EFHD2	0.402637	0.335532	0.81	0.743	1
MYO1E	0.0966305	0.334959	0.429	0.299	1
TNFRSF18	1.96763e-06	0.334177	0.19	0.021	0.0511366
ARL8B	0.00675029	0.333663	0.762	0.601	1
FSCN1	0.0421455	0.332402	0.19	0.075	1
FTH1	0.000489237	0.332212	1	1	1
IGSF6	0.0782782	0.332174	0.952	0.93	1
CRELD2	0.0902916	0.331863	0.381	0.234	1
NT5DC2	0.000961793	0.330458	0.286	0.084	1
VOPP1	0.00161262	0.329956	0.619	0.343	1
PHLDA1	0.0450982	0.329832	0.571	0.36	1
EDF1	0.00406559	0.329382	1	0.809	1
TMEM150A	0.000594199	0.329033	0.524	0.22	1
GNG5	0.0094037	0.32783	0.905	0.963	1
IFIT5	0.0958407	0.327252	0.333	0.208	1
ATP6V1B2	0.0447419	0.327124	0.81	0.734	1
ANXA2	0.0014182	0.325873	1	0.976	1
GLRX3	0.0104621	0.325199	0.571	0.339	1
LPL	0.0878172	0.32487	0.381	0.226	1
CLIC1	0.00212867	0.324795	1	0.962	1
VASP	0.0043092	0.324423	0.81	0.684	1
SH3BGRL3	0.00634833	0.323869	1	0.984	1
ARF4	0.060661	0.322246	0.762	0.67	1
GSN	0.00739788	0.321751	0.952	0.89	1
IFIT3	0.0801498	0.320683	0.714	0.495	1
S100A6	0.262233	0.320337	1	0.988	1
SF3B6	0.0506609	0.320053	0.857	0.673	1
CSTA	0.838942	0.319917	0.571	0.659	1
WTAP	0.0973972	0.319897	0.619	0.463	1
GBP2	0.0345422	0.319882	0.571	0.386	1
FUS	0.0161732	0.319739	0.857	0.762	1
LDHA	0.0375132	0.319064	0.857	0.769	1
FAM107B	0.00777887	0.318725	0.524	0.288	1
NXT1	0.198885	0.318456	0.333	0.224	1
APOL4	0.082483	0.318202	0.476	0.316	1
GTPBP4	0.0251883	0.317325	0.476	0.295	1
SEC61G	0.0678713	0.317214	0.81	0.626	1
SLC16A10	0.013787	0.317173	0.333	0.145	1
DGUOK	0.339297	0.316586	0.571	0.469	1
PPP4C	0.0611442	0.316577	0.667	0.598	1
DNAAF1	0.000666653	0.315915	0.143	0.023	1
GEM	0.015362	0.315448	0.238	0.087	1
BHLHE41	0.120992	0.315393	0.667	0.523	1
TYMP	0.0100926	0.315382	0.952	0.827	1
B4GALT5	0.00947544	0.315352	0.381	0.184	1
FAM129B	0.000677354	0.31465	0.524	0.217	1
NFKBIE	1.51696e-05	0.314292	0.762	0.299	0.394242
MTHFD2	0.00206111	0.314257	0.81	0.493	1
CDC42SE2	0.229684	0.313924	0.429	0.364	1
SLC39A8	0.00512539	0.313255	0.429	0.185	1
CD226	0.000278988	0.313254	0.381	0.119	1
GTF3C4	0.00592931	0.312887	0.286	0.105	1
NUP62	0.0103238	0.312373	0.714	0.53	1
SLC41A2	4.44166e-07	0.311999	0.429	0.093	0.0115434
PSMB9	0.0131979	0.311892	0.905	0.694	1
LRRC59	0.0311988	0.311204	0.571	0.388	1
MARCKSL1	0.0962818	0.310923	0.238	0.131	1
FMNL2	0.0308757	0.310731	0.714	0.521	1
DERL2	0.00807474	0.310171	0.619	0.409	1
MYDGF	0.289809	0.308987	0.714	0.703	1
SNRPE	0.0031624	0.3077	0.857	0.593	1
CCND2	0.303373	0.307366	0.381	0.313	1
P2RY14	0.0678714	0.307274	0.286	0.149	1
LCP1	0.0159977	0.306132	0.952	0.962	1
TBCA	0.0295145	0.305671	0.81	0.675	1
PPP1R14B	0.00351794	0.305348	0.571	0.285	1
APOL1	0.190416	0.305144	0.286	0.18	1
BCL2A1	0.00423799	0.304475	0.952	0.61	1
CDC42SE1	0.00867278	0.303952	0.714	0.444	1
GPR35	0.000217764	0.303555	0.238	0.052	1
LRG1	2.19175e-07	0.303347	0.238	0.028	0.00569614
TTC1	0.0930999	0.302726	0.619	0.483	1
PML	0.0143359	0.302528	0.476	0.253	1
RHEB	0.0781416	0.301609	0.667	0.64	1
TAP2	0.000533015	0.300666	0.714	0.355	1
EMD	0.00529538	0.298413	0.667	0.414	1
RAN	0.0533094	0.297489	0.81	0.832	1
LACC1	0.539931	0.296901	0.238	0.198	1
GPR137B	0.0579356	0.296116	0.381	0.231	1
DNAJB11	0.0345179	0.295641	0.524	0.369	1
TIMM9	0.00515031	0.295441	0.524	0.29	1
NOC4L	2.03186e-05	0.295407	0.429	0.115	0.528061
LILRB4	0.0713902	0.294231	0.81	0.757	1
PSMB3	0.00367537	0.293636	1	0.806	1
BLOC1S6	0.0112884	0.29337	0.667	0.413	1
EMP1	0.0760332	0.293122	0.476	0.364	1
TNS3	0.0534549	0.292811	0.571	0.437	1
C12orf45	0.0152291	0.291694	0.476	0.267	1
TMEM109	0.0246219	0.291615	0.762	0.573	1
BTN2A2	0.41506	0.291334	0.381	0.297	1
KDM6B	0.000110457	0.291188	0.476	0.157	1
VDAC1	0.0115705	0.291126	0.81	0.696	1
NOL8	0.00499102	0.290688	0.667	0.378	1
OST4	0.186655	0.290378	0.905	0.885	1
SLC15A3	0.0166158	0.289461	0.81	0.545	1
COPS6	0.00306142	0.289386	0.714	0.435	1
GFM1	0.906617	0.289381	0.333	0.374	1
PPIF	0.0696981	0.288771	0.524	0.348	1
C11orf58	0.121759	0.288728	0.857	0.823	1
HYOU1	8.50958e-05	0.287861	0.619	0.236	1
FBXO6	0.0658644	0.28786	0.429	0.304	1
DYNLT1	0.294863	0.287039	0.619	0.61	1
ADM	0.0786597	0.285637	0.476	0.304	1
AMPD3	0.0312511	0.285624	0.476	0.297	1
COMMD1	0.00698851	0.28495	0.619	0.395	1
MRPS16	0.0398541	0.284787	0.619	0.446	1
CISD2	0.00382003	0.284548	0.667	0.411	1
TNFAIP6	0.0359234	0.284298	0.143	0.044	1
KCNJ2	0.0903522	0.283242	0.286	0.171	1
MCUB	0.0224357	0.283053	0.571	0.392	1
MRPL21	0.238797	0.282834	0.524	0.407	1
TNFRSF12A	0.0337555	0.282787	0.381	0.201	1
APOBR	0.0350606	0.281642	0.571	0.355	1
GTF3C6	0.150786	0.281136	0.619	0.51	1
SRSF2	0.00363757	0.280872	0.952	0.795	1
TRPV2	0.153875	0.280443	0.476	0.371	1
DBI	0.0345847	0.280421	1	0.89	1
CTSL	0.399584	0.279999	0.762	0.701	1
MRPS12	0.199072	0.279717	0.476	0.371	1
TLR2	0.13609	0.27957	0.762	0.635	1
ACTB	0.00269747	0.27879	1	0.998	1
ITGB8	0.00286411	0.278764	0.143	0.028	1
CISH	0.145365	0.277796	0.524	0.402	1
CFL1	0.0278913	0.277295	1	0.986	1
EXOSC10	0.0308882	0.277113	0.571	0.322	1
SEC11C	0.0315	0.277015	0.667	0.484	1
CD63	0.01113	0.276882	1	0.983	1
PA2G4	0.308509	0.276605	0.667	0.61	1
COA4	0.0292664	0.276572	0.619	0.4	1
NFE2L2	0.810133	0.276098	0.619	0.738	1
TDG	0.00554379	0.274658	0.571	0.308	1
PRRC2A	0.0229927	0.274024	0.476	0.267	1
SDS	0.0161482	0.273993	0.524	0.278	1
GLS	0.0562346	0.27398	0.571	0.434	1
SRP14	0.0138839	0.273881	1	0.951	1
CCL2	0.0710805	0.273846	0.571	0.395	1
GOSR2	0.0102744	0.273828	0.333	0.15	1
TARS	0.0158169	0.273695	0.667	0.465	1
TGFB1	0.196407	0.273304	0.762	0.666	1
PPP2R3C	0.0225137	0.273265	0.667	0.456	1
TPM3	0.0255278	0.273157	0.952	0.949	1
ILF3	0.0525602	0.272809	0.714	0.621	1
EHBP1L1	0.0161003	0.272549	0.619	0.427	1
TMX2	0.075283	0.272259	0.476	0.325	1
EIF5B	0.242307	0.27194	0.714	0.65	1
HINT1	0.01969	0.271807	0.952	0.841	1
NUP153	0.0062889	0.271727	0.429	0.217	1
TRIM26	0.0864878	0.271549	0.429	0.267	1
ISOC1	0.114095	0.271528	0.286	0.171	1
LINC02345	0.506691	0.269527	0.19	0.142	1
LIMK2	0.0320484	0.269449	0.238	0.105	1
RAPGEF2	0.0522509	0.268943	0.333	0.194	1
CADM1	0.120841	0.26873	0.286	0.18	1
NUDT2	0.0889328	0.268059	0.286	0.164	1
TMEM258	0.0129866	0.268005	0.857	0.705	1
ABL1	0.288121	0.267529	0.19	0.124	1
BCL3	0.0457217	0.267105	0.333	0.18	1
CLEC2B	0.285884	0.266616	0.81	0.755	1
LACTB	0.121242	0.266524	0.81	0.605	1
VRK2	0.0649769	0.266478	0.476	0.334	1
ISCU	0.0115716	0.266042	0.857	0.706	1
SNRPD1	0.0182116	0.265344	0.667	0.505	1
AP2A1	0.000296474	0.264987	0.524	0.199	1
DKC1	0.00392863	0.264839	0.476	0.208	1
SRI	0.105853	0.264771	0.714	0.596	1
WDR75	0.188592	0.263964	0.333	0.224	1
MRPL32	0.0491391	0.263874	0.571	0.369	1
SLC43A2	0.0531402	0.263757	0.571	0.406	1
MSANTD3	0.047394	0.263654	0.19	0.079	1
CREM	0.348551	0.263261	0.381	0.339	1
RRP7A	0.0124243	0.263229	0.571	0.348	1
PIM3	0.11782	0.262929	0.429	0.283	1
LSM2	0.540246	0.262918	0.381	0.381	1
HAVCR2	0.43936	0.262632	0.667	0.687	1
ADAM17	0.0525049	0.262557	0.571	0.42	1
RELA	0.0316281	0.262193	0.429	0.269	1
SLC25A38	0.0517536	0.261673	0.286	0.138	1
ANXA11	0.0467063	0.261052	0.81	0.699	1
PDE4B	0.0689355	0.260857	0.381	0.227	1
GSAP	0.0159368	0.260825	0.619	0.439	1
MB21D2	0.0597191	0.260687	0.19	0.082	1
ATP13A3	0.0786981	0.260426	0.476	0.346	1
TAGLN2	0.0319324	0.25954	1	0.846	1
NFKBIA	0.0183561	0.258692	1	0.969	1
EREG	0.0109249	0.258471	0.143	0.035	1
PPIA	0.00306284	0.257927	1	0.988	1
TMEM126A	0.0372866	0.257861	0.571	0.379	1
TRAPPC2	0.0160896	0.257382	0.238	0.082	1
THUMPD3	0.0446335	0.257197	0.476	0.309	1
FAM49B	0.0704912	0.256972	0.905	0.815	1
FKBP2	0.0287373	0.256958	0.762	0.601	1
VPS4B	0.115821	0.256602	0.667	0.523	1
MLH1	0.0734093	0.256338	0.381	0.238	1
MMP25-AS1	0.00020277	0.255453	0.143	0.019	1
GAPDH	0.0393938	0.255424	1	0.984	1
TAF9	0.0314188	0.255236	0.667	0.502	1
TMEM183A	0.0115296	0.255221	0.429	0.222	1
DDX46	0.00749422	0.254858	0.762	0.479	1
NUP37	0.0109659	0.254535	0.333	0.145	1
DRAP1	0.0536055	0.254379	0.905	0.773	1
MEPCE	0.00167453	0.254282	0.381	0.14	1
SELENOK	0.0649123	0.254084	0.81	0.619	1
PIP5K1A	0.000898689	0.253952	0.381	0.129	1
GPR183	0.588181	0.253918	0.762	0.743	1
PRMT1	0.0423942	0.253808	0.571	0.409	1
BLOC1S1	0.0854221	0.253788	0.714	0.628	1
ACTR3	0.0219228	0.253719	1	0.907	1
ZNF254	0.327501	0.253454	0.19	0.128	1
RDH11	0.14424	0.253387	0.667	0.591	1
OTUB1	0.291465	0.252597	0.571	0.584	1
EIF1	0.00954878	0.252353	1	0.997	1
PLK3	0.0109854	0.252254	0.476	0.236	1
PAPSS1	0.983124	0.251376	0.381	0.467	1
NEK6	0.291728	0.251208	0.619	0.509	1
CCL17	0.0443425	0.251123	0.333	0.177	1
PHRF1	0.388904	0.250806	0.19	0.133	1
MRPL4	0.209052	0.250714	0.476	0.376	1
LONP1	0.0607152	0.250338	0.286	0.157	1
CD70	0.00319887	0.250122	0.143	0.028	1
CUTA	0.108305	-0.250056	0.571	0.76	1
RHOB	0.643837	-0.250115	0.667	0.661	1
HLA-DOA	0.164722	-0.250842	0.571	0.68	1
WDR45B	0.0424187	-0.251082	0.143	0.343	1
GNG2	0.0175746	-0.251224	0	0.217	1
SLC29A1	0.0189675	-0.251352	0.143	0.409	1
AKAP13	0.0877869	-0.251934	0.571	0.752	1
ARL11	0.0146031	-0.251961	0.048	0.311	1
CEP350	0.143356	-0.252071	0.571	0.698	1
PIK3C2A	0.100512	-0.25356	0.238	0.379	1
UTRN	0.0547332	-0.25367	0.333	0.516	1
DCAF5	0.0269096	-0.25375	0.095	0.311	1
ZNF791	0.0714501	-0.253901	0.095	0.262	1
AP1B1	0.223238	-0.254358	0.429	0.479	1
HRH2	0.0187239	-0.254738	0	0.213	1
NPC1	0.0433358	-0.255542	0.095	0.295	1
FAM46A	0.0706876	-0.255925	0.19	0.395	1
CFAP97	0.0632095	-0.255936	0.143	0.323	1
NT5C3A	0.107771	-0.256109	0.19	0.327	1
IRF5	0.04559	-0.25673	0.143	0.334	1
NUMA1	0.0221276	-0.256752	0.095	0.325	1
SNRNP27	0.00693036	-0.257489	0.048	0.334	1
ADAMTSL4	0.0494714	-0.257563	0.19	0.392	1
MRPL36	0.0635816	-0.25813	0.143	0.304	1
RIN3	0.173421	-0.258394	0.476	0.549	1
C6orf62	0.248662	-0.25861	0.571	0.61	1
SIGLEC1	0.267658	-0.259059	0.333	0.416	1
HBP1	0.045221	-0.259348	0.238	0.435	1
LAMTOR4	0.0876064	-0.259498	0.762	0.834	1
FAM13A	0.0309072	-0.259525	0.048	0.247	1
SIRT2	0.042146	-0.259653	0.143	0.332	1
SNX13	0.019702	-0.259724	0.095	0.336	1
CREB3L2	0.0580015	-0.260043	0.238	0.407	1
MEGF9	0.0116689	-0.260265	0.048	0.313	1
OAS1	0.405224	-0.260437	0.571	0.552	1
BTK	0.10364	-0.260459	0.381	0.526	1
LTB	0.0791227	-0.260556	0.095	0.248	1
GLOD4	0.0734658	-0.261452	0.333	0.456	1
KLF9	0.122858	-0.26184	0.381	0.523	1
CEP57	0.038546	-0.263526	0.095	0.304	1
COPB2	0.0601513	-0.263773	0.333	0.528	1
BNIP3L	0.0765825	-0.26405	0.476	0.614	1
PKIB	0.439355	-0.264116	0.333	0.379	1
EPHX1	0.139442	-0.264441	0.19	0.344	1
MOCS2	0.069813	-0.264952	0.19	0.344	1
ALOX5	0.0352054	-0.265083	0.619	0.764	1
CYSLTR1	0.0347698	-0.265235	0.095	0.315	1
DPYD	0.16435	-0.265331	0.476	0.561	1
LMO2	0.13688	-0.265562	0.286	0.4	1
SKAP2	0.0874451	-0.265941	0.571	0.694	1
PREX1	0.0248119	-0.266031	0.19	0.49	1
HSDL2	0.0147669	-0.266047	0.095	0.367	1
VAMP2	0.110919	-0.266067	0.333	0.46	1
STT3B	0.059218	-0.266189	0.429	0.593	1
SOX4	0.0917532	-0.266536	0.048	0.205	1
RPAP3	0.0298834	-0.266583	0.095	0.306	1
ECI2	0.0337215	-0.266738	0.143	0.362	1
GINM1	0.023574	-0.267303	0.19	0.465	1
EMC4	0.0365522	-0.267835	0.429	0.614	1
CD99	0.102484	-0.268197	0.714	0.783	1
ITGB2	0.0569322	-0.268297	0.905	0.963	1
RPL23	0.0385344	-0.269868	1	0.993	1
RABGAP1L	0.0939123	-0.270376	0.238	0.392	1
RPL21	0.056183	-0.270908	1	0.988	1
MBNL2	0.0139234	-0.272427	0.095	0.381	1
CREB5	0.0452129	-0.27243	0.095	0.288	1
KMT5B	0.0198529	-0.272448	0.143	0.365	1
ECH1	0.087954	-0.272711	0.571	0.703	1
SUSD3	0.0387433	-0.273276	0.048	0.243	1
STUB1	0.0282542	-0.27338	0.286	0.517	1
SERPINB6	0.070831	-0.273728	0.476	0.631	1
HMGB2	0.27647	-0.273872	0.571	0.643	1
PGD	0.0999402	-0.273963	0.429	0.621	1
SIGIRR	0.00947959	-0.273994	0	0.25	1
SETX	0.0946695	-0.274358	0.524	0.626	1
KIAA0100	0.0291527	-0.274789	0.19	0.428	1
SRSF7	0.913112	-0.275028	0.857	0.851	1
AC023157.3	0.393938	-0.275354	0.095	0.15	1
SELPLG	0.0274159	-0.275419	0.19	0.46	1
GPRIN3	0.130416	-0.275594	0.667	0.743	1
S100B	0.542141	-0.275662	0.143	0.198	1
NNT	0.00674718	-0.275751	0.048	0.343	1
ALDH1A1	0.166899	-0.276202	0.19	0.341	1
CD300LF	0.0339931	-0.276764	0.143	0.344	1
EIF3E	0.0802542	-0.276905	0.762	0.733	1
TSPAN3	0.0538669	-0.276973	0.381	0.579	1
TSPAN31	0.0132249	-0.277292	0.095	0.369	1
VPS41	0.0326469	-0.277423	0.238	0.442	1
RPL37	0.0205134	-0.277584	1	0.991	1
FKBP8	0.019965	-0.277668	0.286	0.559	1
TMEM131	0.0310328	-0.277879	0.143	0.372	1
CYB5R1	0.0119542	-0.278146	0.095	0.365	1
POLR2G	0.0311117	-0.278239	0.381	0.587	1
GNPTG	0.0478902	-0.278526	0.571	0.664	1
RNF13	0.0947504	-0.279511	0.619	0.748	1
ARHGDIB	0.0532292	-0.280199	0.905	0.955	1
SAMD9	0.194933	-0.2802	0.381	0.472	1
PPP2R5A	0.0103043	-0.280713	0.048	0.302	1
NHLRC3	0.0130525	-0.281013	0.095	0.357	1
HEBP2	0.0878671	-0.281225	0.381	0.528	1
RPS27	0.0210856	-0.281269	1	0.998	1
CLU	0.122503	-0.281318	0.667	0.811	1
P4HA1	0.0375137	-0.281995	0.19	0.399	1
RBM26	0.0318422	-0.282168	0.238	0.439	1
KCNE3	0.0256866	-0.282372	0.143	0.392	1
MAP3K5	0.0185042	-0.282549	0.095	0.339	1
MPEG1	0.059216	-0.283064	0.381	0.584	1
ANAPC13	0.0424542	-0.283123	0.238	0.416	1
DDIT4	0.144109	-0.283871	0.333	0.495	1
BROX	0.0856679	-0.283918	0.476	0.614	1
GIMAP2	0.0431544	-0.284226	0.19	0.402	1
TET2	0.0490163	-0.284661	0.238	0.477	1
HIST1H4C	0.189991	-0.28485	0.238	0.334	1
ASAP1	0.019858	-0.285353	0.286	0.531	1
CTNND1	0.138009	-0.285647	0.429	0.516	1
ZNF518A	0.0266568	-0.28636	0.095	0.306	1
CD302	0.105606	-0.286752	0.476	0.649	1
EIF1B	0.179794	-0.286828	0.667	0.703	1
USP34	0.0340961	-0.286872	0.19	0.404	1
YY1	0.00828532	-0.287147	0.333	0.614	1
CORO1A	0.122692	-0.287335	0.381	0.519	1
ARHGAP18	0.037652	-0.288693	0.857	0.869	1
GGA2	0.0491899	-0.288856	0.286	0.463	1
TLR4	0.0548741	-0.289116	0.429	0.601	1
NEMF	0.0820551	-0.289553	0.381	0.544	1
MANBA	0.0314433	-0.289627	0.238	0.441	1
NUP214	0.14775	-0.289628	0.381	0.474	1
MAPRE2	0.0107024	-0.289874	0.048	0.308	1
PELI1	0.0477289	-0.290234	0.095	0.29	1
SLC46A3	0.0387959	-0.29028	0.143	0.332	1
CALM2	0.0186104	-0.290613	0.952	0.955	1
CNOT1	0.0407407	-0.291681	0.238	0.442	1
GADD45B	0.393711	-0.292611	0.667	0.834	1
SF3B1	0.0231852	-0.293484	0.762	0.948	1
MRPL18	0.0629413	-0.293863	0.333	0.586	1
ZMYM4	0.0280079	-0.294221	0.143	0.353	1
MRPL16	0.0359995	-0.294631	0.238	0.441	1
NDUFS1	0.0205949	-0.295733	0.19	0.423	1
ENPP2	0.0436885	-0.296182	0.143	0.36	1
MT-TW	0.0180432	-0.296285	0.095	0.341	1
GIMAP7	0.227996	-0.296286	0.333	0.449	1
LRRC25	0.0266839	-0.296408	0.19	0.428	1
YIPF3	0.0431354	-0.296898	0.333	0.491	1
GGTA1P	0.038094	-0.296967	0.381	0.593	1
NCKAP1L	0.0164766	-0.297013	0.476	0.642	1
WDR26	0.014044	-0.297078	0.095	0.353	1
DDX42	0.0239436	-0.297209	0.19	0.428	1
MRPL55	0.0423959	-0.297428	0.238	0.425	1
GDE1	0.0248268	-0.298152	0.143	0.348	1
MPC2	0.039808	-0.298352	0.429	0.57	1
LTA4H	0.650883	-0.298608	0.667	0.643	1
FIS1	0.0466851	-0.29873	0.619	0.713	1
CAT	0.102152	-0.299681	0.571	0.603	1
PTEN	0.0233703	-0.299738	0.286	0.514	1
INTS10	0.0198658	-0.299853	0.143	0.383	1
IL18	0.0232473	-0.300419	0.524	0.748	1
STK17A	0.0296467	-0.300477	0.143	0.376	1
FRMD4B	0.0534249	-0.300922	0.333	0.551	1
IQGAP1	0.03267	-0.301538	0.857	0.909	1
PSMB8-AS1	0.0187341	-0.301719	0.095	0.329	1
IFRD1	0.184945	-0.302669	0.19	0.299	1
DNAJC10	0.0242879	-0.30283	0.286	0.551	1
C20orf27	0.0708404	-0.303204	0.286	0.479	1
PPP1CB	0.0359628	-0.303969	0.333	0.544	1
SDCCAG8	0.191229	-0.304584	0.524	0.593	1
TBC1D4	0.00415879	-0.305505	0	0.292	1
ADIPOR1	0.00972878	-0.305537	0.286	0.535	1
DHRS3	0.0219614	-0.306066	0.19	0.43	1
SORT1	0.0200313	-0.306811	0.286	0.563	1
TFRC	0.676766	-0.307509	0.333	0.341	1
KLF3	0.0100045	-0.307587	0.095	0.393	1
HMGN3	0.0553163	-0.307668	0.476	0.635	1
CCDC170	0.0429653	-0.308979	0.095	0.287	1
C5AR1	0.103718	-0.309097	0.381	0.573	1
SYNE1	0.0328948	-0.309971	0.143	0.339	1
RTCB	0.00468837	-0.310608	0.143	0.467	1
ATRX	0.0685245	-0.310641	0.476	0.654	1
LGALS3BP	0.113748	-0.311194	0.619	0.706	1
OLFML2B	0.0104704	-0.31248	0	0.245	1
PEPD	0.0367669	-0.31288	0.429	0.593	1
GIMAP1	0.0354031	-0.312974	0.19	0.392	1
WAC	0.0299557	-0.313422	0.429	0.607	1
NOP53	0.0382829	-0.313549	0.524	0.687	1
ZMYND8	0.00855866	-0.313735	0.048	0.308	1
LY86	0.0359489	-0.313739	0.619	0.802	1
BLVRB	0.148943	-0.313836	0.524	0.626	1
LRRFIP1	0.00538862	-0.314129	0.667	0.888	1
COMMD6	0.0721247	-0.314353	0.667	0.86	1
WBP2	0.0335122	-0.314455	0.381	0.57	1
PIK3R1	0.0564122	-0.314459	0.381	0.563	1
ETV5	0.0319274	-0.315062	0.095	0.295	1
NIPSNAP3A	0.0139578	-0.31613	0.143	0.376	1
SARAF	0.0347409	-0.317391	0.762	0.895	1
SLC11A1	0.17344	-0.317629	0.381	0.503	1
ZNHIT3	0.0177721	-0.317756	0.143	0.39	1
ADORA3	0.16965	-0.317857	0.238	0.35	1
P2RY12	0.0243265	-0.31789	0.048	0.257	1
NDFIP1	0.016644	-0.318401	0.524	0.712	1
TSPAN14	0.0151099	-0.318495	0.286	0.565	1
MCEMP1	0.142003	-0.319487	0.048	0.177	1
PTP4A1	0.0743685	-0.319855	0.429	0.593	1
HSP90AA1	0.738915	-0.320359	1	0.991	1
SNX2	0.0427296	-0.321195	0.762	0.788	1
EIF4A2	0.0807728	-0.32172	0.762	0.914	1
TBC1D15	0.0245678	-0.321912	0.19	0.427	1
LTC4S	0.0213802	-0.323041	0.095	0.351	1
AKAP9	0.094555	-0.323901	0.524	0.643	1
FLI1	0.00269886	-0.324506	0	0.313	1
SIRPB1	0.04157	-0.3247	0.19	0.371	1
RNASE1	0.711652	-0.324744	0.19	0.159	1
TSPAN4	0.0823118	-0.32525	0.286	0.458	1
ATRAID	0.0412035	-0.325481	0.524	0.675	1
HNMT	0.0671987	-0.325771	0.619	0.699	1
SLC4A7	0.0753681	-0.326879	0.19	0.343	1
PEBP1	0.0190607	-0.326894	0.714	0.871	1
CCDC88A	0.114054	-0.328115	0.762	0.832	1
RAB11A	0.0251634	-0.328952	0.429	0.65	1
NTAN1	0.0182747	-0.331107	0.143	0.371	1
PCED1B-AS1	0.0495384	-0.331305	0.333	0.49	1
SCAMP2	0.0270499	-0.331958	0.571	0.767	1
SESN3	0.0219142	-0.332431	0.095	0.316	1
PHF3	0.0127251	-0.332545	0.476	0.673	1
LDHB	0.0339295	-0.33378	0.429	0.696	1
ATXN7L3B	0.00484957	-0.333834	0.095	0.383	1
HIST1H1E	0.0754587	-0.334741	0.19	0.339	1
TECR	0.009631	-0.334944	0.143	0.458	1
SH3KBP1	0.0450358	-0.335737	0.429	0.584	1
CH25H	0.178087	-0.335976	0.095	0.219	1
BMP2K	0.0909174	-0.336152	0.524	0.624	1
PJA2	0.0126624	-0.336164	0.286	0.621	1
IL13RA1	0.0244324	-0.337702	0.667	0.813	1
MT1G	0.170367	-0.33819	0.143	0.294	1
2022-03-01	0.0120773	-0.338216	0.571	0.75	1
PIM1	0.0362839	-0.338543	0.095	0.316	1
IDH1	0.193175	-0.338861	0.476	0.552	1
PLAC8	0.753951	-0.338949	0.19	0.199	1
GNPTAB	0.017488	-0.339363	0.381	0.652	1
PTPRA	0.00619217	-0.339819	0.143	0.423	1
PNKD	0.00509328	-0.340189	0.095	0.404	1
MGST1	0.0389135	-0.340228	0.238	0.434	1
RPS10	0.0120673	-0.341757	0.429	0.6	1
ARMT1	0.00919926	-0.342324	0.095	0.369	1
SAMHD1	0.00829429	-0.342584	0.952	0.956	1
IGHG4	0.979954	-0.34259	0.238	0.24	1
EVI2A	0.0295966	-0.342848	0.429	0.591	1
TM6SF1	0.0272498	-0.342886	0.333	0.587	1
ITPRIPL2	0.0255024	-0.344131	0.19	0.409	1
SBDS	0.0169912	-0.344273	0.286	0.484	1
LRPAP1	0.117195	-0.344453	0.762	0.736	1
TMEM30A	0.0181931	-0.34473	0.333	0.614	1
EIF3G	0.0197636	-0.345796	0.476	0.654	1
CTSK	0.351177	-0.346792	0.048	0.108	1
CPED1	0.017232	-0.347366	0.095	0.337	1
FES	0.00572925	-0.347889	0.048	0.339	1
DDX3X	0.0294543	-0.348182	0.571	0.85	1
CD68	0.0173864	-0.349149	0.381	0.659	1
CD59	0.114961	-0.34988	0.476	0.563	1
CSF1R	0.0782909	-0.352221	0.762	0.827	1
RAB11FIP1	0.00779492	-0.352829	0.143	0.434	1
TNFSF12	0.0214505	-0.354447	0.476	0.64	1
METTL9	0.0643971	-0.354695	0.429	0.502	1
NDUFS4	0.00959441	-0.355425	0.238	0.491	1
TMEM160	0.0284944	-0.355737	0.381	0.558	1
CTBS	0.0149886	-0.360298	0.286	0.517	1
SORL1	0.226625	-0.360843	0.524	0.572	1
CNPY3	0.0242097	-0.361048	0.571	0.743	1
GM2A	0.147199	-0.361234	0.524	0.645	1
ASAH1	0.11407	-0.361521	0.857	0.885	1
CXCL2	0.114995	-0.362656	0.19	0.374	1
ZKSCAN1	0.0066227	-0.362713	0.095	0.383	1
IRF2BP2	0.016458	-0.363119	0.333	0.579	1
SCD	0.134726	-0.36337	0.238	0.353	1
PLPP3	0.00918122	-0.363892	0.143	0.42	1
FCHO2	0.0230962	-0.366679	0.381	0.605	1
CRTAP	0.021214	-0.367362	0.619	0.773	1
CHPT1	0.00148186	-0.368164	0	0.341	1
H1FX	0.145136	-0.369562	0.429	0.502	1
HBEGF	0.573147	-0.369678	0.333	0.365	1
BEST1	0.00680742	-0.370439	0.381	0.657	1
NRBF2	0.00953669	-0.37046	0.238	0.479	1
BOD1L1	0.0172236	-0.371168	0.238	0.491	1
GADD45A	0.0192386	-0.372054	0.048	0.267	1
ZFP36L1	0.0481585	-0.372113	0.714	0.864	1
ESD	0.0113626	-0.372393	0.429	0.647	1
SNX5	0.00714564	-0.372853	0.381	0.712	1
EIF2AK2	0.0337297	-0.373553	0.381	0.612	1
TKT	0.0221619	-0.374776	0.619	0.818	1
CCR2	0.0180212	-0.375462	0.048	0.299	1
CDC42EP3	0.00475539	-0.375728	0.095	0.404	1
APOE	0.218425	-0.375888	0.762	0.781	1
SPCS1	0.00639604	-0.376568	0.667	0.788	1
TBXAS1	0.0435406	-0.377554	0.524	0.654	1
PPIP5K2	0.00642326	-0.378292	0.19	0.477	1
IGLC2	0.359146	-0.378762	0.238	0.152	1
BTG2	0.177817	-0.378817	0.476	0.622	1
GLB1	0.0111118	-0.37982	0.524	0.692	1
YPEL3	0.00419794	-0.38013	0.095	0.434	1
TPP1	0.0106539	-0.380268	0.714	0.804	1
CHIT1	0.118766	-0.383607	0	0.105	1
BAZ2B	0.0472545	-0.383987	0.429	0.61	1
ATP5IF1	0.00670864	-0.384019	0.667	0.773	1
NAPSB	0.21268	-0.384372	0.524	0.57	1
TMBIM1	0.0159834	-0.384727	0.524	0.68	1
GCHFR	0.275271	-0.384838	0.286	0.379	1
H2AFY	0.0121381	-0.385428	0.762	0.85	1
CHD9	0.0108818	-0.386096	0.286	0.591	1
FOLR2	0.126257	-0.387096	0.238	0.404	1
ETS2	0.0205357	-0.389101	0.571	0.799	1
P2RY13	0.161267	-0.390693	0.476	0.638	1
GAPT	0.231631	-0.391048	0.381	0.413	1
ETNK1	0.00808954	-0.391271	0.19	0.448	1
C1orf162	0.0630555	-0.391721	0.905	0.895	1
MCFD2	0.00140812	-0.392707	0.095	0.451	1
DOK2	0.0101139	-0.39378	0.19	0.477	1
DCK	0.00137154	-0.394601	0.048	0.4	1
NDUFA2	0.004758	-0.395146	0.476	0.722	1
BCAP31	0.0237389	-0.396502	0.81	0.78	1
KCTD12	0.0104744	-0.399079	0.81	0.909	1
CD93	0.0881181	-0.40205	0.286	0.451	1
IER2	0.574087	-0.402121	0.714	0.797	1
DNAJB4	0.290566	-0.404111	0.286	0.35	1
PHACTR1	0.074676	-0.404917	0.238	0.463	1
SLTM	0.0100868	-0.406065	0.381	0.614	1
PRCP	0.0072438	-0.407443	0.381	0.68	1
SPARC	0.042541	-0.407457	0.19	0.392	1
LIPA	0.538745	-0.410279	0.714	0.734	1
NPL	0.110055	-0.412477	0.333	0.488	1
STK17B	0.0300862	-0.413924	0.333	0.535	1
CD37	0.00509429	-0.414335	0.762	0.865	1
EVI2B	0.00341428	-0.41443	0.714	0.834	1
FCGR2A	0.054752	-0.416596	0.857	0.906	1
VAT1	0.0303657	-0.417552	0.333	0.509	1
MAF	0.00522556	-0.418183	0.143	0.462	1
FCGR3A	0.0577545	-0.420271	0.619	0.797	1
CD84	0.0599273	-0.421311	0.619	0.717	1
HEXB	0.0116081	-0.421548	0.81	0.872	1
SESN1	0.0241525	-0.422486	0.19	0.421	1
FCN1	0.792775	-0.423829	0.286	0.24	1
DAB2	0.05239	-0.427912	0.714	0.799	1
FN1	0.273385	-0.428682	0.762	0.808	1
TSC22D3	0.0161657	-0.429344	0.714	0.874	1
UBE2R2	0.000490636	-0.432128	0.095	0.49	1
EGR2	0.227275	-0.433344	0.333	0.467	1
PHIP	0.00174855	-0.437548	0.143	0.477	1
CTSS	0.0306798	-0.437895	1	0.995	1
MEF2A	0.0359192	-0.438702	0.714	0.748	1
ID3	0.240452	-0.442015	0.476	0.523	1
IFI44	0.0110804	-0.445821	0.333	0.594	1
ATM	0.00192498	-0.44735	0.143	0.495	1
USP53	0.048594	-0.447757	0.143	0.325	1
TOP2B	0.000494338	-0.448071	0.048	0.439	1
PIK3AP1	0.00353799	-0.449012	0.238	0.551	1
CLDN1	0.789009	-0.451034	0.429	0.423	1
SCP2	0.000885837	-0.451901	0.524	0.759	1
PLBD1	0.0111744	-0.452662	0.476	0.696	1
CD46	0.00281537	-0.453829	0.524	0.78	1
OGFRL1	0.00515326	-0.45596	0.476	0.762	1
APOC1	0.40223	-0.456723	0.762	0.771	1
IQGAP2	0.00665831	-0.456783	0.286	0.603	1
C3AR1	0.0358521	-0.458009	0.762	0.767	1
CTSD	0.451735	-0.459811	0.857	0.904	1
H1F0	0.0325808	-0.460558	0.238	0.456	1
LAMP1	0.00923942	-0.470742	0.476	0.692	1
TUBA1A	0.0233247	-0.471108	0.476	0.71	1
IFI6	0.53504	-0.475393	1	0.843	1
PYCARD	0.00709462	-0.47554	0.619	0.813	1
ASPH	0.00288557	-0.476638	0.238	0.556	1
VSIR	0.00594279	-0.477614	0.333	0.652	1
MS4A7	0.00776185	-0.477996	0.714	0.913	1
STAB1	0.163681	-0.481974	0.333	0.399	1
DHRS7	0.00232319	-0.482474	0.429	0.755	1
PLAU	0.0603184	-0.482697	0.524	0.647	1
S100A9	0.717926	-0.485647	0.619	0.477	1
CLEC7A	0.00336933	-0.486385	0.619	0.813	1
CREG1	0.0602457	-0.48816	0.762	0.813	1
RGS19	0.00578703	-0.491593	0.381	0.607	1
NR4A2	0.4331	-0.49691	0.238	0.281	1
APLP2	0.00218694	-0.498659	0.81	0.939	1
GUSB	0.000406229	-0.499528	0.143	0.535	1
HEXA	0.00194165	-0.504297	0.429	0.664	1
FUCA1	0.0466248	-0.505522	0.381	0.561	1
PMP22	0.0545419	-0.50728	0.381	0.537	1
HSPA1A	0.719866	-0.508511	0.952	0.93	1
RNASET2	0.00121448	-0.508584	0.857	0.899	1
FOSB	0.665553	-0.508929	0.619	0.6	1
RNF149	0.00368021	-0.514824	0.381	0.671	1
YWHAH	0.0674485	-0.514977	0.81	0.837	1
ITM2B	0.000197683	-0.515863	0.952	0.998	1
FCGR2B	0.0119911	-0.516517	0.667	0.792	1
CITED2	0.00314568	-0.516816	0.381	0.705	1
HSPH1	0.219145	-0.522793	0.857	0.71	1
RNASE6	0.0168321	-0.523353	0.524	0.668	1
HSD17B11	0.00225596	-0.525357	0.381	0.654	1
GDF15	0.0280683	-0.526426	0	0.191	1
FCGBP	0.342295	-0.528964	0.19	0.262	1
MNDA	0.00539701	-0.532161	0.81	0.907	1
MARCO	0.184888	-0.534251	0.095	0.215	1
TGFBR2	0.000444545	-0.534757	0.286	0.624	1
IER5	0.170669	-0.537396	0.524	0.635	1
TMEM59	0.000305933	-0.538472	0.476	0.781	1
IFIT1	0.0780149	-0.539325	0.19	0.372	1
PECAM1	0.000649471	-0.539566	0.429	0.731	1
MIS18BP1	0.000646479	-0.548609	0.19	0.586	1
RGS2	0.0309012	-0.549065	0.476	0.755	1
JAML	0.00535899	-0.549732	0.381	0.656	1
JUN	0.186987	-0.556722	0.952	0.99	1
LGMN	0.226834	-0.558311	0.429	0.531	1
PTGS2	0.202153	-0.558424	0.095	0.194	1
CD163	0.00809636	-0.561089	0.619	0.818	1
IGHG3	0.59796	-0.565332	0.143	0.177	1
FCGRT	0.000182942	-0.566639	0.952	0.927	1
CHI3L1	0.498937	-0.570999	0.143	0.201	1
MEF2C	0.00229452	-0.57399	0.286	0.675	1
FTL	0.129679	-0.574792	1	1	1
CD36	0.00401378	-0.582408	0	0.294	1
FOS	0.0152761	-0.584728	0.952	0.983	1
CLK1	0.00290427	-0.589145	0.286	0.615	1
CX3CR1	0.00854128	-0.600082	0.095	0.397	1
GLIPR1	0.000826108	-0.600185	0.667	0.844	1
ZCRB1	5.9382e-05	-0.604403	0.095	0.545	1
TXNIP	0.000225229	-0.604859	0.905	0.988	1
CD69	0.0878404	-0.615628	0.286	0.423	1
CFD	0.0242233	-0.629662	0.286	0.472	1
HSPA1B	0.503275	-0.632792	0.762	0.759	1
MRC1	0.0684739	-0.670437	0.762	0.736	1
TNF	0.769909	-0.679704	0.429	0.35	1
DNAJB1	0.151953	-0.681945	0.667	0.816	1
PLD3	0.0236032	-0.687325	0.571	0.738	1
IGHG1	0.20634	-0.697882	0.286	0.428	1
HSPA6	0.324179	-0.705691	0.19	0.292	1
BAG3	0.0440849	-0.723447	0.095	0.28	1
LPAR6	0.000568251	-0.730137	0.524	0.815	1
MS4A4A	0.00499573	-0.745534	0.429	0.645	1
MS4A6A	0.00170679	-0.747615	0.952	0.871	1
CXCL8	0.221519	-0.757955	0.381	0.545	1
F13A1	0.0451629	-0.759555	0.476	0.605	1
CYP27A1	0.0869043	-0.770568	0.333	0.425	1
GPR34	0.000472554	-0.781245	0.286	0.68	1
EGR1	0.0247422	-0.784696	0.571	0.771	1
CCL3L1	0.940389	-0.800728	0.571	0.551	1
SPP1	0.313719	-0.818752	0.619	0.505	1
ACP5	0.0996626	-0.901785	0.571	0.617	1
IFNGR1	6.42889e-07	-0.945171	0.667	0.949	0.016708
CD14	3.30569e-05	-0.970042	0.619	0.911	0.859117
VSIG4	2.28576e-05	-1.01331	0.238	0.743	0.594046
CEBPD	0.000131178	-1.02785	0.667	0.883	1
ZFP36L2	8.95884e-08	-1.03923	0.619	0.925	0.00232831
NUPR1	0.00194746	-1.04235	0.143	0.462	1
GPNMB	0.134272	-1.07858	0.714	0.703	1
PDK4	9.54924e-05	-1.18526	0.19	0.612	1
SLC40A1	0.00122655	-1.20042	0.048	0.399	1
SELENOP	0.110345	-1.26021	0.143	0.281	1
CCL18	0.161848	-1.58882	0.19	0.325	1
